# Supplementary material for: Dimensional analysis meets AI for non-Newtonian droplet generation
Source: Royal Society of Chemistry journal article supplement (doi:10.1039/d4lc00946k), 2025-01-01
Supplement: d4lc00946k6.pdf [file d4lc00946k6.pdf]

```
# -*- coding: utf-8 -*-
```

```
"""
```

```
Created on Wed Sep 25 11:06:13 2024
```

```
@author: farnoosh
```

```
"""
```

```
# Import necessary libraries
```

```
import numpy as np
```

```
import pandas as pd
```

```
import matplotlib.pyplot as plt
```

```
from sklearn.preprocessing import MinMaxScaler
```

```
from sklearn.metrics import r2_score
```

```
from tensorflow.keras.models import Sequential
```

```
from tensorflow.keras.layers import Dense
```

```
import random
```

```
from tensorflow.keras.models import load_model
```

```
# Load input data
```

```
# Read the input and output CSV files
```

```
X = pd.read_csv('/CSV_InputwithZeroes_crossfitParam_10params.csv')
```

```
y = pd.read_csv('/CSV_YYs_withZEROES.csv')
```

```
# Handle missing data by dropping rows with missing values (blanks)
```

```
X = X.dropna()
```

```
X_temporary = X.iloc[:, 0:4]
```

```
X_cross = X.iloc[:, 4:6]
```

```
ymain = y.loc[X.index] # Keep only the rows corresponding to non-missing input data
```

```
# Extract only the 3rd column (q = Qd/Qc) from the output data
```

```
y = ymain.iloc[:, 1].values # 2 because it's the third column (Python is 0-indexed)
```

```
y2 = ymain.iloc[:, 0:2].values
```

```
# Extract the values for X
```

```
X = X.values
```

```
X_temporary = X_temporary.values
```

```
X_cross = X_cross.values
```

```
# Scale input data to range [0, 1]
```

```
#scaler = MinMaxScaler()
```

```
#X_scaled = scaler.fit_transform(X)
```

```
# Create a list of all indices
```

```
exampleList = list(range(len(X)))
```

```
# Define the function to sample the list
```

```
def sample_list(example_list, sample_size):
```

```
    sampled_list = random.sample(example_list, sample_size)
```

```
    for i in sampled_list:
```

```
        example_list.remove(i)
```

```
    return sampled_list
```

```
# Sample the lists as per the requirements
```

```
sampled_list1 = sample_list(exampleList, 108)
```

```
sampled_list2 = sample_list(exampleList, 108)
```

```
sampled_list3 = sample_list(exampleList, 108)
sampled_list4 = sample_list(exampleList, 108)
sampled_list5 = sample_list(exampleList, 108)
sampled_list6 = sample_list(exampleList, 108)
sampled_list7 = sample_list(exampleList, 108)
sampled_list8 = sample_list(exampleList, 108)
sampled_list9 = sample_list(exampleList, 108)
sampled_list10 = sample_list(exampleList, 107)
```

```
# Combine the sampled lists for training and validation
```

```
FINAL = sampled_list1 + sampled_list2 + sampled_list3 + sampled_list4 + sampled_list5 +
sampled_list7 + sampled_list8 + sampled_list9 + sampled_list10
```

```
#FINAL2 = sampled_list10
```

```
FINAL2 = sampled_list6 + sampled_list8
```

```
# Prepare training and validation datasets
```

```
X_train = X[FINAL]
```

```
X_cross_train = X_cross[FINAL]
```

```
X_cross_val = X_cross[FINAL2]
```

```
y_train = y[FINAL]
```

```
X_val = X[FINAL2]
```

```
y_val = y[FINAL2]
```

```
Ytrainpart2 = y2[FINAL,:]
```

```
Yvalpart2 = y2[FINAL2,:]
```

```
# Create the Neural Network model

model = Sequential()

model.add(Dense(500, input_dim=X_train.shape[1], activation='relu'))
model.add(Dense(300, activation='relu'))
model.add(Dense(100, activation='relu'))
model.add(Dense(1, activation='linear')) # Output layer for regression (predicting q = Qd/Qc)

# Compile the model

model.compile(loss='mean_squared_error', optimizer='adam',
metrics=['mean_squared_error'])

# Train the model

history = model.fit(X_train, y_train, epochs=1000, batch_size=10, validation_data=(X_val,
y_val), verbose=1)

# Predict on validation set

y_pred = model.predict(X_val)
y_predpart2 = model.predict(X_train)

# Calculate R^2 score

r2 = r2_score(y_val, y_pred)

# Plot Q experimental (Qd/Qc) vs Q predicted (Qd/Qc)

plt.figure(figsize=(8, 6))

plt.scatter(y_val, y_pred, color='blue', label='Data points')

plt.plot([min(y_val), max(y_val)], [min(y_val), max(y_val)], color='red', linewidth=2,
label='Perfect Prediction Line')
```

```
plt.xlabel('Qc Experimental')
plt.ylabel('Qc Predicted ')
plt.title(f'Qc Experimental Predicted (R2 = {r2:.3f})')
plt.legend()
plt.show()

#
AA = np.mean(np.abs([y_predpart2-y_train]))

#model.save('C:/Users/farno/OneDrive/Desktop/Secondment/presentations/Claire_ML/26sep
/modelQc.h5')
#model =
load_model('C:/Users/farno/OneDrive/Desktop/Secondment/presentations/Claire_ML/26sep/
modelQcc.h5')

ypredtest_flow2 = model.predict(X_val)
ypredtest_flow3 = model.predict(X_train)

X3_min = ypredtest_flow3 - 40
X3_max = ypredtest_flow3 + 40
X3_mid = (X3_min + X3_max) / 2 # midpoint as a representative

X3val_min = ypredtest_flow2 - 40
X3val_max = ypredtest_flow2 + 40
X3val_mid = (X3val_min + X3val_max) / 2 # midpoint as a representative
```

```

# Calculate U_c, shear_rate, eta_c, Wi, alfa, Ca_c, Re_c using Qc_pred
depth_of_channel = 190 / 1000 # 190 micrometers converted to meters
cross_section_area = (190 / 1000) * (195 / 1000) / 60 # (190µm x 195µm) converted to
m²/60

U_c = y_pred / cross_section_area # Continuous phase velocity
shear_rate = U_c / depth_of_channel # Shear rate

# Calculate eta_c (avoid division by zero by adding a small epsilon)
epsilon = 1e-10
eta_c = X_cross_val[:, 0] / ((1 + X_val[:, 0] * shear_rate.flatten()) ** X_cross_val[:, 1] +
epsilon)

# Calculate Wi, alfa, Ca_c, Re_c (handle potential divisions by zero or near-zero values)
Wi = X_val[:, 3] * shear_rate.flatten()
alfa = 0.029 / (eta_c . flatten() + epsilon)
Ca_c = (eta_c . flatten() * U_c . flatten() / 1000) / (X_val[:, 2] / 1000 + epsilon)# 2 replaced to
y_predpart2
Re_c = (1000 * U_c . flatten() / 1000) * (190 / 10 ** 6) / (eta_c . flatten() + epsilon)

X3 = ypredtest_flow2
X4 = alfa
X5 = Wi
X6 = Re_c

```

```
X7 = Ca_c
```

```
X_val_new = np.hstack([X_val, X7.flatten().reshape(-1, 1),  
                        X3.reshape(-1, 1),  
                        X4.reshape(-1, 1),  
                        X5.reshape(-1, 1),  
                        X6.reshape(-1, 1)])
```

```
U_c_val = ypredtest_flow2 / cross_section_area
```

```
U_c_train = ypredtest_flow3 / cross_section_area
```

```
shear_rate_val = U_c_val / depth_of_channel
```

```
shear_rate_train = U_c_train / depth_of_channel # Shear rate
```

```
eta_c2 = X_cross_train[:, 0] / ((1 + X_train[:, 3] * shear_rate_train.flatten()) **  
X_cross_train[:, 1] + epsilon)
```

```
# Calculate Wi, alfa, Ca_c, Re_c (handle potential divisions by zero or near-zero values)
```

```
Wi2 = X_train[:, 3] * shear_rate_train.flatten()
```

```
alfa2 = 0.029 / (eta_c2.flatten() + epsilon)
```

```
Ca_c2 = (eta_c2.flatten() * U_c_train.flatten() / 1000) / (X_train[:, 2] / 1000 + epsilon) # 2  
replaced to y_predpart2
```

```
Re_c2 = (1000 * U_c_train.flatten() / 1000) * (190 / 10 ** 6) / (eta_c2.flatten() + epsilon)
```

```
X3_2 = ypredtest_flow3
```

```
X4_2 = alfa2
```

```
X5_2 = Wi2
```

```
X6_2 = Re_c2
```

```
X7_2 = Ca_c2
```

```
X_train_new = np.hstack([X_train, X7_2.flatten().reshape(-1, 1),  
                        X3_2.reshape(-1, 1),  
                        X4_2.reshape(-1, 1),  
                        X5_2.reshape(-1, 1),  
                        X6_2.reshape(-1, 1)])
```

```
from sklearn.ensemble import RandomForestRegressor
```

```
# Initialize Random Forest Regressor
```

```
rf = RandomForestRegressor(n_estimators=500, random_state=42)
```

```
# Train the model on your dataset
```

```
rf.fit(X_train_new, Ytrainpart2)
```

```
# Predict on new data
```

```
y_pred = rf.predict(X_val_new)
```

```
plt.figure(figsize=(8, 8))
```

```
plt.scatter( Yvalpart2[:,0]/Yvalpart2[:,1],y_pred[:,0]/y_pred[:,1], c='blue', label='Predicted vs.  
Exp')
```



```
# Values you want to save
```

```
Yval0 = Yvalpart2[:, 0]
```

```
Yval1 = Yvalpart2[:, 1]
```

```
y_pred0 = y_pred[:, 0]
```

```
y_pred1 = y_pred[:, 1]
```

```
Yval_ratio = Yval0 / Yval1
```

```
y_pred_ratio = y_pred0 / y_pred1
```

```
#####Test  
sets#####
```

```
#####peo test 190  
channel#####
```

```
X = pd.read_csv('/CSV_InputwithZeroes_peo.csv')
```

```
y = pd.read_csv('/CSV_YYs_withZEROES_peo.csv')
```

```
# Handle missing data by dropping rows with missing values (blanks)
```

```
X = X.dropna()
```

```
X_temporary = X.iloc[:, 0:4]
```

```
X_cross = X.iloc[:, 4:6]
```

```
ymain = y.loc[X.index] # Keep only the rows corresponding to non-missing input data
```

```
#Extract only the 3rd column (q = Qd/Qc) from the output data
y = ymain.iloc[:, 1].values # 2 because it's the third column (Python is 0-indexed)
y2 = ymain.iloc[:, 0:2].values
```

```
# Extract the values for X
X = X.values
X_temporary = X_temporary.values
X_cross = X_cross.values
```

```
# Prepare training and validation datasets
```

```
X_test_peo = X
X_cross_test_peo = X_cross
y_test_peo = y
```

```
y_test_part2 = y2
```

```
y_predtest_flow3 = model.predict(X_test_peo)
```

```
X3_min = y_predtest_flow3 - 40
```

```
X3_max = y_predtest_flow3 + 40
```

```
X3_mid = (X3_min + X3_max) / 2 # midpoint as a representative
```

```
# Calculate U_c, shear_rate, eta_c, Wi, alfa, Ca_c, Re_c using Qc_pred
```

```
depth_of_channel = 190 / 1000 # 190 micrometers converted to meters
cross_section_area = (190 / 1000) * (195 / 1000) / 60 # (190µm x 195µm) converted to
m²/60
```

```
U_c = y_predtest_flow3 / cross_section_area # Continuous phase velocity
shear_rate = U_c / depth_of_channel # Shear rate
```

```
# Calculate eta_c (avoid division by zero by adding a small epsilon)
```

```
epsilon = 1e-10
```

```
eta_c = X_cross_test_peo[:, 0] / ((1 + X_test_peo[:, 0] * shear_rate.flatten()) **
X_cross_test_peo[:, 1] + epsilon)
```

```
# Calculate Wi, alfa, Ca_c, Re_c (handle potential divisions by zero or near-zero values)
```

```
Wi = X_test_peo[:, 3] * shear_rate.flatten()
```

```
alfa = 0.029 / (eta_c . flatten() + epsilon)
```

```
Ca_c = (eta_c . flatten() * U_c . flatten() / 1000) / (X_test_peo[:, 2] / 1000 + epsilon)# 2
replaced to y_predpart2
```

```
Re_c = (1000 * U_c . flatten() / 1000) * (190 / 10 ** 6) / (eta_c . flatten() + epsilon)
```

```
X3 = y_predtest_flow3
```

```
X4 = alfa
```

```
X5 = Wi
```

```
X6 = Re_c
```

```
X7 = Ca_c
```

```
X_test_new = np.hstack([X_test_peo, X7.flatten().reshape(-1, 1),
                        X3.reshape(-1, 1),
                        X4.reshape(-1, 1),
                        X5.reshape(-1, 1),
                        X6.reshape(-1, 1)])
```

```
y_pred = rf.predict(X_test_new)
```

```
plt.figure(figsize=(8, 8))
```

```
plt.scatter(y_test_part2[:,0]/y_test_part2[:,1],y_pred[:,0]/y_pred[:,1], c='blue',
            label='Predicted vs. Exp')
```

```
Yval0 = y_test_part2[:, 0]
```

```
Yval1 = y_test_part2[:, 1]
```

```
y_pred0 = y_pred[:, 0]
```

```
y_pred1 = y_pred[:, 1]
```

```
Yval_ratio = Yval0 / Yval1
```

```
y_pred_ratio = y_pred0 / y_pred1
```

```
#####peo test 100  
channel#####
```

```
X = pd.read_csv('/CSV_InputwithZeroes_geometry100_peo.csv')
```

```
y = pd.read_csv('/CSV_YYs_withZEROES_geometry100_peo.csv')
```

```
# Handle missing data by dropping rows with missing values (blanks)
```

```
X = X.dropna()
X_temporary = X.iloc[:, 0:4]
X_cross = X.iloc[:, 4:6]

y_main = y.loc[X.index] # Keep only the rows corresponding to non-missing input data

#Extract only the 3rd column (q = Qd/Qc) from the output data
y = y_main.iloc[:, 1].values # 2 because it's the third column (Python is 0-indexed)
y2 = y_main.iloc[:, 0:2].values

# Extract the values for X
X = X.values
X_temporary = X_temporary.values
X_cross = X_cross.values

# Prepare training and validation datasets
X_test_peo = X
X_cross_test_peo = X_cross
y_test_peo = y

y_test_part2 = y2

y_predtest_flow3 = model.predict(X_test_peo)

X3_min = y_predtest_flow3 - 40
```

```

X3_max = y_predtest_flow3 + 40
X3_mid = (X3_min + X3_max) / 2 # midpoint as a representative

# Calculate U_c, shear_rate, eta_c, Wi, alfa, Ca_c, Re_c using Qc_pred
depth_of_channel = 100 / 1000 # 190 micrometers converted to meters
cross_section_area = (100 / 1000) * (105 / 1000) / 60 # (190µm x 195µm) converted to
m²/60

U_c = y_predtest_flow3 / cross_section_area # Continuous phase velocity
shear_rate = U_c / depth_of_channel # Shear rate

# Calculate eta_c (avoid division by zero by adding a small epsilon)
epsilon = 1e-10

eta_c = X_cross_test_peo[:, 0] / ((1 + X_test_peo[:, 0] * shear_rate.flatten()) **
X_cross_test_peo[:, 1] + epsilon)

#

# Calculate Wi, alfa, Ca_c, Re_c (handle potential divisions by zero or near-zero values)
Wi = X_test_peo[:, 3] * shear_rate.flatten()
alfa = 0.029 / (eta_c . flatten() + epsilon)
Ca_c = (eta_c. flatten() * U_c. flatten() / 1000) / (X_test_peo[:, 2] / 1000 + epsilon)# 2
replaced to y_predpart2
Re_c = (1000 * U_c. flatten() / 1000) * (100 / 10 ** 6) / (eta_c. flatten() + epsilon)

```

```
X3 = y_predtest_flow3
```

```
X4 = alfa
```

```
X5 = Wi
```

```
X6 = Re_c
```

```
X7 = Ca_c
```

```
X_test_new = np.hstack([X_test_peo, X7.flatten().reshape(-1, 1),
```

```
    X3.reshape(-1, 1),
```

```
    X4.reshape(-1, 1),
```

```
    X5.reshape(-1, 1),
```

```
    X6.reshape(-1, 1)])
```

```
y_pred = rf.predict(X_test_new)
```

```
plt.figure(figsize=(8, 8))
```

```
plt.scatter(y_test_part2[:,0]/y_test_part2[:,1], y_pred[:,0]/y_pred[:,1], c='blue',  
label='Predicted vs. Exp')
```

```
Yval00 = y_test_part2[:, 0]
```

```
Yval11 = y_test_part2[:, 1]
```

```
y_pred0 = y_pred[:, 0]
```

```
y_pred1 = y_pred[:, 1]
```

```
Yval_ratio = Yval00 / Yval11
```

```
y_pred_ratio = y_pred0 / y_pred1
```

```

#####Geometry 100# HA
#####

X = pd.read_csv('/CSV_InputwithZeroes_geometry_HA100_CROSSparam.csv')
y = pd.read_csv('/CSV_YYs_withZEROES_geometry_HA100.csv')

# Handle missing data by dropping rows with missing values (blanks)
X = X.dropna()
X_temporary = X.iloc[:, 0:4]
X_cross = X.iloc[:, 4:6]

ymain = y.loc[X.index] # Keep only the rows corresponding to non-missing input data

#Extract only the 3rd column (q = Qd/Qc) from the output data
y = ymain.iloc[:, 1].values # 2 because it's the third column (Python is 0-indexed)
y2 = ymain.iloc[:, 0:2].values

# Extract the values for X
X = X.values
X_temporary = X_temporary.values
X_cross = X_cross.values

# Prepare training and validation datasets

```



```
X_test_peo = X
```

```
X_cross_test_peo = X_cross
```

```
y_test_peo = y
```

```
y_test_part2 = y2
```

```
y_predtest_flow3 = model.predict(X_test_peo)
```

```
X3_min = y_predtest_flow3 - 40
```

```
X3_max = y_predtest_flow3 + 40
```

```
X3_mid = (X3_min + X3_max) / 2 # midpoint as a representative
```

```
# Calculate U_c, shear_rate, eta_c, Wi, alfa, Ca_c, Re_c using Qc_pred
```

```
depth_of_channel = 100 / 1000 # 190 micrometers converted to meters
```

```
cross_section_area = (100 / 1000) * (105 / 1000) / 60 # (190µm x 195µm) converted to  
m2/60
```

```
U_c = y_predtest_flow3 / cross_section_area # Continuous phase velocity
```

```
shear_rate = U_c / depth_of_channel # Shear rate
```

```
# Calculate eta_c (avoid division by zero by adding a small epsilon)
```

```
epsilon = 1e-10
```

```
eta_c = X_cross_test_peo[:, 0] / ((1 + X_test_peo[:, 0] * shear_rate.flatten()) **  
X_cross_test_peo[:, 1] + epsilon)
```

```
#
```

```
# Calculate Wi, alfa, Ca_c, Re_c (handle potential divisions by zero or near-zero values)
```

```
Wi = X_test_peo[:, 3] * shear_rate.flatten()
```

```
alfa = 0.029 / (eta_c . flatten() + epsilon)
```

```
Ca_c = (eta_c. flatten() * U_c. flatten() / 1000) / (X_test_peo[:, 2] / 1000 + epsilon)# 2  
replaced to y_predpart2
```

```
Re_c = (1000 * U_c. flatten() / 1000) * (100 / 10 ** 6) / (eta_c. flatten() + epsilon)
```

```
X3 = y_predtest_flow3
```

```
X4 = alfa
```

```
X5 = Wi
```

```
X6 = Re_c
```

```
X7 = Ca_c
```

```
X_test_new = np.hstack([X_test_peo, X7.flatten().reshape(-1, 1),
```

```
    X3.reshape(-1, 1),
```

```
    X4.reshape(-1, 1),
```

```
    X5.reshape(-1, 1),
```

```
    X6.reshape(-1, 1)])
```

```
y_pred = rf.predict(X_test_new)
```

```
plt.figure(figsize=(8, 8))
```

```
plt.scatter(y_test_part2[:,0]/y_test_part2[:,1],y_pred[:,0]/y_pred[:,1], c='blue',  
label='Predicted vs. Exp')
```

$Yval00 = y\_test\_part2[:, 0]$

$Yval11 = y\_test\_part2[:, 1]$

$y\_pred0 = y\_pred[:, 0]$

$y\_pred1 = y\_pred[:, 1]$

$Yval\_ratio = Yval00 / Yval11$

$y\_pred\_ratio = y\_pred0 / y\_pred1$
