# Supplementary material for: Dimensional analysis meets AI for non-Newtonian droplet generation
Source: Royal Society of Chemistry journal article supplement (doi:10.1039/d4lc00946k), 2025-01-01
Supplement: d4lc00946k8.pdf [file d4lc00946k8.pdf]

## Supplementary Information to Dimensional Analysis Meets AI for non-Newtonian Droplet Generation

Farnoosh Hormozinezhad,<sup>1</sup> Claire Barnes,<sup>2</sup> Alexandre Fabregat,<sup>1</sup> Salvatore Cito,<sup>1</sup>  
Francesco Del Giudice<sup>3</sup>

<sup>1</sup>Departament d'Enginyeria Mecànica, Universitat Rovira i Virgili, Tarragona, Spain

<sup>2</sup>Department of Biomedical Engineering, Swansea University, UK.

<sup>3</sup>Complex Fluids Research Group, Department of Chemical Engineering, Swansea University,  
Fabian Way, SA1 8EN, Swansea, UK. E-mail: francesco.delgiudice@swansea.ac.uk

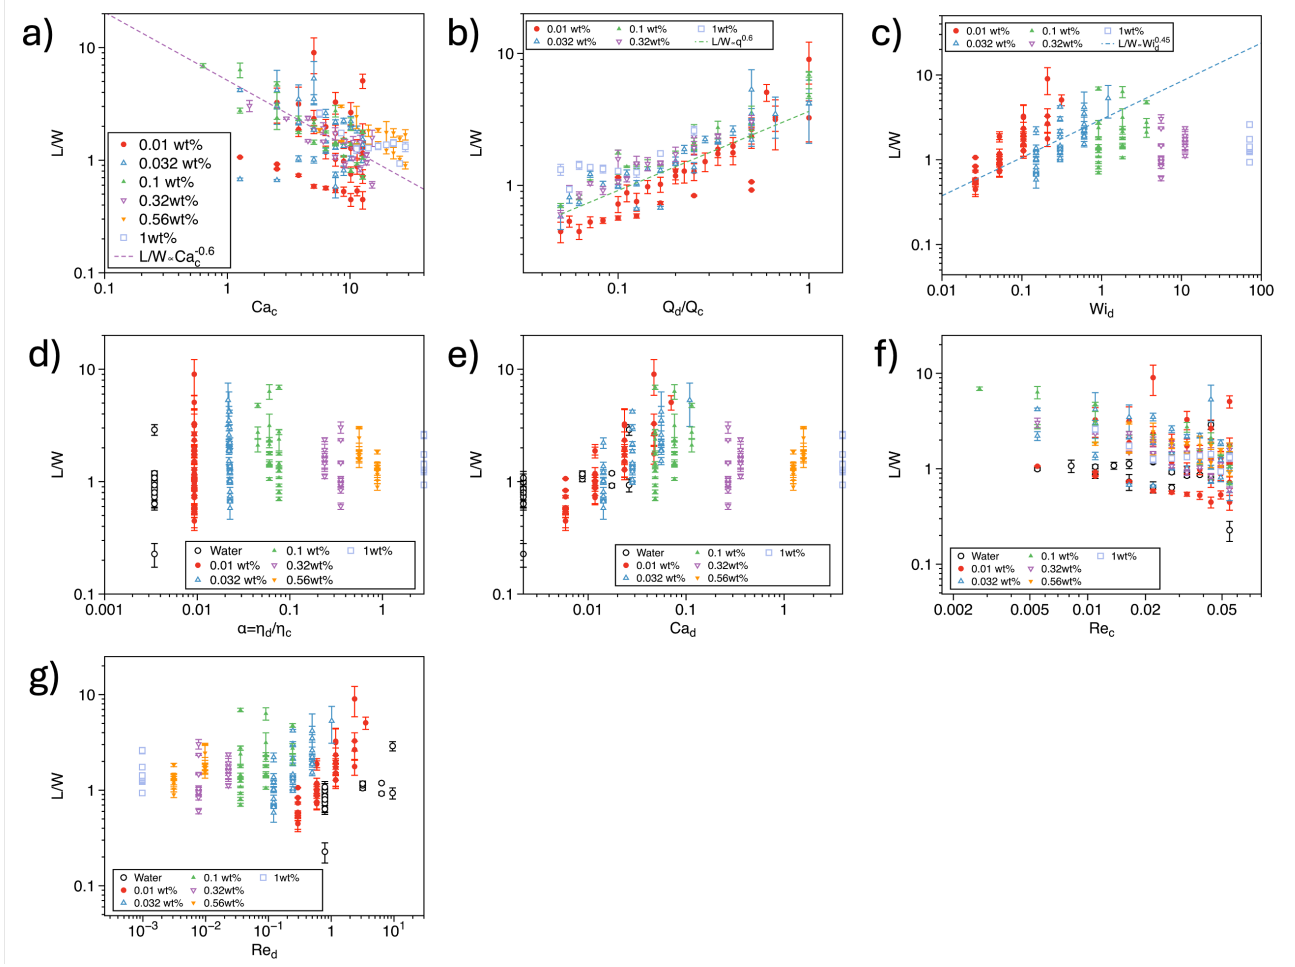

Figure S1: Behaviour of droplet length  $L$  normalised by the channel width  $W$  as a function of different dimensionless parameters. Dashed lines are the best fit of a subset of the data and are colour-coded to the fitted data. When no fitting is available, we could not identify any clear correlation.

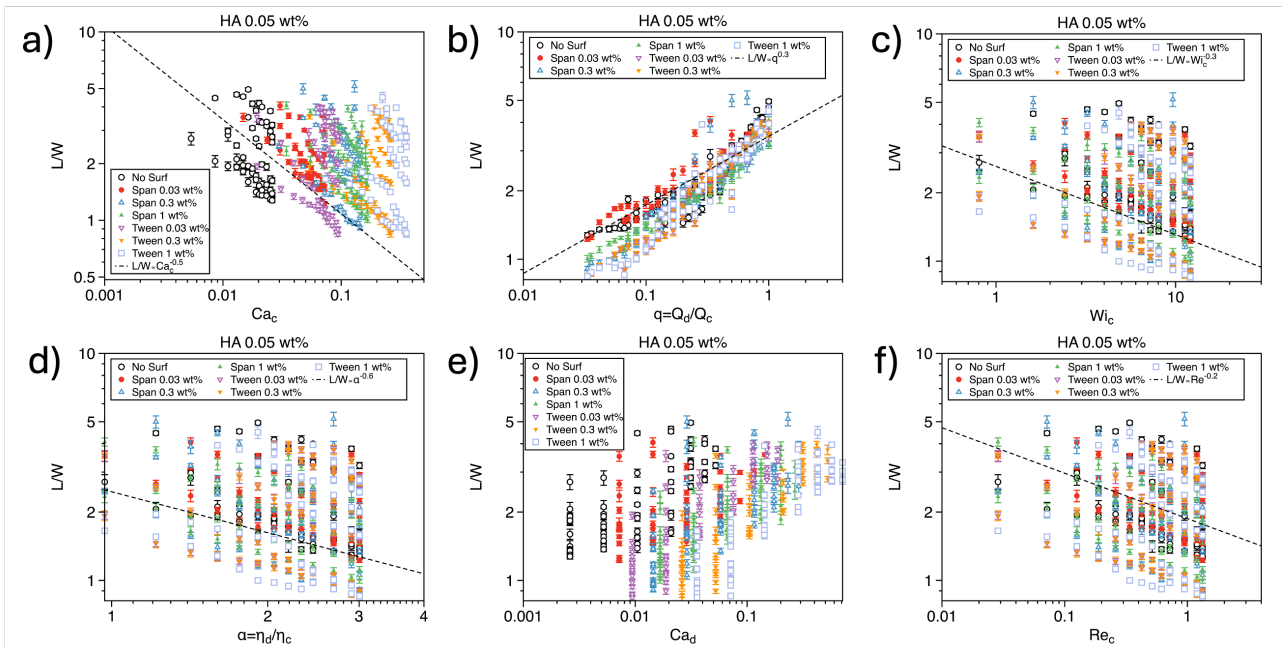

Figure S2: Behaviour of droplet length  $L$  normalised by the channel width  $W$  as a function of different dimensionless parameters. Dashed lines are the best fit of a subset of the data and are colour-coded to the fitted data. When no fitting is available, we could not identify any clear correlation.

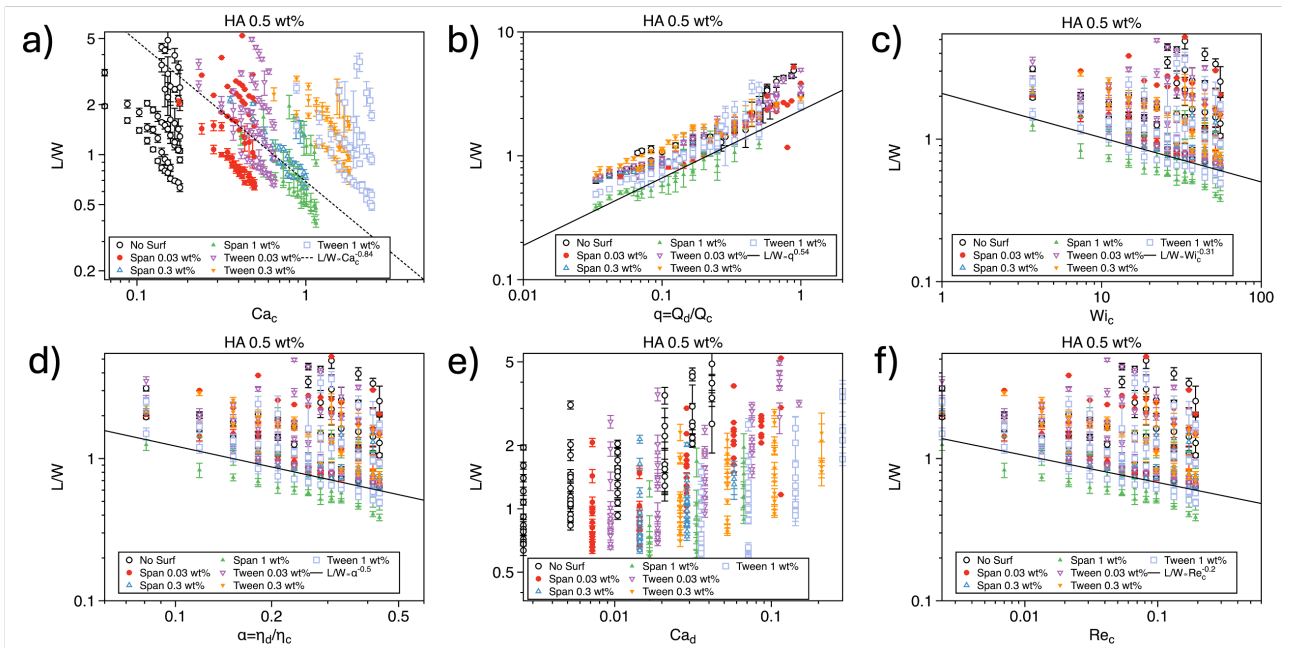

Figure S3: Behaviour of droplet length  $L$  normalised by the channel width  $W$  as a function of different dimensionless parameters. Dashed lines are the best fit of a subset of the data and are colour-coded to the fitted data. When no fitting is available, we could not identify any clear correlation.
