# Supplementary material for: Dimensional analysis meets AI for non-Newtonian droplet generation
Source: Lab Chip. 2025 Feb 12;25(7):1681–93. doi: 10.1039/d4lc00946k (PMC11834948; doi:10.1039/d4lc00946k)
Supplement: LC-025-D4LC00946K-s001 [file LC-025-D4LC00946K-s001.xlsx]

## Sheet: holdout_20%_Normal_HA
Qd_actual	Qc_actual	Qd_predicted	Qc_predicted	Qd/Qc	Qd/Qc_predicted
5	70	8.498	95.828	0.0714286	0.0886797
5	20	8.55	54.1	0.25	0.158041
100	120	62.8667	90.01	0.833333	0.698441
5	70	11.07	106.8	0.0714286	0.103652
5	80	9.11833	87.9867	0.0625	0.103633
20	100	21.97	118.32	0.2	0.185683
60	100	62.8267	98.7033	0.6	0.63652
40	140	28.538	89.5627	0.285714	0.318637
10	70	12.1333	55.64	0.142857	0.218069
5	100	17.62	126.08	0.05	0.139753
20	70	20.71	120.94	0.285714	0.171242
60	140	51.0173	123.489	0.428571	0.413131
5	150	6.03	144.66	0.0333333	0.0416839
10	120	8.68	104.64	0.0833333	0.0829511
5	10	18.2	35.98	0.5	0.505837
10	40	10.89	43.32	0.25	0.251385
20	80	28.3673	115.078	0.25	0.246505
60	150	38.5673	102.386	0.4	0.376684
20	100	11.69	66.2	0.2	0.176586
20	40	13.8017	39.2367	0.5	0.351754
40	140	23.71	63.13	0.285714	0.375574
5	90	6.75	137.96	0.0555556	0.0489272
5	120	8.49	130.7	0.0416667	0.0649579
40	70	61.4054	100.089	0.571429	0.61351
20	40	41.2362	87.6224	0.5	0.470613
5	140	7.4	142.62	0.0357143	0.0518861
10	120	11.04	104.12	0.0833333	0.106032
40	80	33.3633	82.775	0.5	0.403061
5	30	9.66667	51.2467	0.166667	0.18863
5	40	13.78	69.42	0.125	0.198502
10	60	8.55	54.1	0.166667	0.158041
10	20	19.2687	77.536	0.5	0.248513
5	80	6.86	137.86	0.0625	0.0497606
5	100	15.46	111.75	0.05	0.138345
10	100	7.83117	85.057	0.1	0.0920696
10	100	16.33	93.3	0.1	0.175027
5	150	7.36	140.8	0.0333333	0.0522727
10	100	15.51	115.14	0.1	0.134706
20	90	49.152	127.964	0.222222	0.384108
40	100	50.8147	103.263	0.4	0.49209
20	80	17.06	92.76	0.25	0.183915
60	140	49.2927	92.9593	0.428571	0.530261
60	150	43.8755	113.134	0.4	0.387818
80	120	45.5087	66.2823	0.666667	0.686588
5	90	12.3	116.1	0.0555556	0.105943
5	80	11.6267	86.38	0.0625	0.134599
40	150	19.02	51.62	0.266667	0.368462
5	100	7.33	113.52	0.05	0.0645701
60	100	55.1835	110.788	0.6	0.498102
40	50	31.564	37.732	0.8	0.836531
10	150	6.12	142.4	0.0666667	0.0429775
100	150	58.8133	95.5433	0.666667	0.615567
40	100	34.1022	83.3567	0.4	0.409112
10	80	8.163	80.9947	0.125	0.100784
60	80	42.5867	66.0033	0.75	0.64522
60	120	58.7333	95.8967	0.5	0.612465
40	120	29.3062	73.969	0.333333	0.396195
10	60	13.86	60.54	0.166667	0.22894
10	80	8.94	100.58	0.125	0.0888845
10	10	23.57	40.88	1	0.576566
80	120	46.4207	79.58	0.666667	0.583321
10	90	11.0663	89.6447	0.111111	0.123447
10	120	7.745	102.09	0.0833333	0.0758644
5	80	6.96	109.2	0.0625	0.0637363
10	90	10.9292	79.6167	0.111111	0.137272
5	20	29.834	118.898	0.25	0.250921
5	80	8.51	118.14	0.0625	0.0720332
60	120	58.0156	110.239	0.5	0.526272
5	60	10.08	71.72	0.0833333	0.140547
80	120	21.384	30.132	0.666667	0.709677
20	60	43.7173	93.617	0.333333	0.466981
60	140	61.0833	124.533	0.428571	0.490498
20	60	41.4117	91.3443	0.333333	0.453359
40	90	42.2725	94.4964	0.444444	0.447345
20	80	26.8213	108.763	0.25	0.246603
10	140	8.26	130.78	0.0714286	0.0631595
40	100	59.4175	116.709	0.4	0.50911
5	150	7.38	133.7	0.0333333	0.0551982
60	140	45.299	109.583	0.428571	0.413377
10	50	10.2183	45.4833	0.2	0.224661
40	70	59.2253	95.826	0.571429	0.618051
5	70	6.86	90.48	0.0714286	0.0758179
10	30	8.27	36.66	0.333333	0.225586
80	140	55.3318	106.243	0.571429	0.520806
5	90	14.31	97.34	0.0555556	0.14701
5	30	8.9	40.06	0.166667	0.222167
5	150	6.76	128.34	0.0333333	0.0526726
40	150	26.17	119.54	0.266667	0.218923
5	120	8.92	116.18	0.0416667	0.0767774
40	150	24.1	145.96	0.266667	0.165114
60	80	57.6167	93.865	0.75	0.613825
5	40	8.05667	59.84	0.125	0.134637
10	140	6.76	143.34	0.0714286	0.0471606
100	140	60.53	89.9373	0.714286	0.673024
5	140	6.67	134.48	0.0357143	0.0495985
40	90	33.546	75.5533	0.444444	0.444004
5	70	10.3467	90.8067	0.0714286	0.113942
5	100	6.54	135.04	0.05	0.0484301
5	40	7.96833	50.3033	0.125	0.158406
40	120	30.03	93.36	0.333333	0.321658
40	70	34.2993	56.5837	0.571429	0.60617
40	40	41.0167	55.4033	1	0.740329
10	30	10.595	32.07	0.333333	0.330371
40	100	32.376	90.2167	0.4	0.358869
20	120	18.19	125.02	0.166667	0.145497
20	60	15.6067	81.22	0.333333	0.192153
80	140	63.966	112.181	0.571429	0.570204
5	80	11.411	105.746	0.0625	0.10791
80	140	72.462	130.733	0.571429	0.554275
10	70	10.2567	104.907	0.142857	0.0977694
5	100	9.65	101.32	0.05	0.0952428
5	70	9.59017	88.9177	0.0714286	0.107854
10	80	11.19	67.28	0.125	0.16632
10	50	9.37	45.04	0.2	0.208037
80	150	58.0033	112.696	0.533333	0.514688
10	120	9.23	114.94	0.0833333	0.0803028
20	80	15.6167	72.44	0.25	0.215581
40	80	40.69	68.63	0.5	0.592889
60	100	51.9878	106.261	0.6	0.489247
20	140	16.8675	116.905	0.142857	0.144284
5	40	6.43	49.44	0.125	0.130057
10	30	13.345	30.05	0.333333	0.444093
10	60	17.33	85.74	0.166667	0.202123
80	80	67.8367	97.2907	1	0.697258
10	90	10.7167	75.62	0.111111	0.141717
40	90	44.5837	100.789	0.444444	0.442347
5	150	6.7	136.02	0.0333333	0.0492575
40	60	41.0087	57.1523	0.666667	0.717533
5	80	8.89617	94.217	0.0625	0.0944221
80	90	63.7607	91.922	0.888889	0.693639
20	70	15.2217	81.9	0.285714	0.185857
20	90	13.01	100.81	0.222222	0.129055
5	20	9.36167	33.2767	0.25	0.281328
20	30	30.4633	48.0767	0.666667	0.633641
10	70	8.77033	83.9787	0.142857	0.104435
20	140	18.42	130.72	0.142857	0.140912
10	10	13.25	25.72	1	0.515163
10	150	12.81	127.5	0.0666667	0.100471
5	90	8.04317	94.159	0.0555556	0.0854211
10	40	10.6858	42.7183	0.25	0.250146

## Sheet: peo_in_geom100
Qd_actual	Qc_actual	Qd_predicted	Qc_predicted	Qd/Qc	Qd/Qc_predicted
5	20	62.1571	111.828	0.25	0.555827
5	40	9.19	129.42	0.125	0.0710091
5	60	7.98	128.6	0.0833333	0.0620529
10	40	32.0911	63.6438	0.25	0.504231
10	60	23.84	116.31	0.166667	0.204969
10	80	7.87	128.46	0.125	0.0612642
15	20	21.37	30.66	0.75	0.696999
15	40	47.0533	106.633	0.375	0.441263
20	40	15.09	24.62	0.5	0.612916
20	60	18.22	29.6	0.333333	0.615541
20	80	47.9307	107.236	0.25	0.446963

## Sheet: peo_in_geom190
Qd_actual	Qc_actual	Qd_predicted	Qc_predicted	Qd/Qc	Qd/Qc_predicted
10	10	20.6613	35.5527	1	0.581147
10	20	42.3689	89.3472	0.5	0.474205
10	40	23.69	112.14	0.25	0.211254
10	60	9.32	126.8	0.166667	0.0735016
10	80	8.5	128.26	0.125	0.0662716
20	20	22.18	41.2133	1	0.538175
20	40	34.0633	72.7057	0.5	0.46851
20	60	34.7675	93.7572	0.333333	0.370825
20	80	18.37	127.02	0.25	0.144623
20	100	16.59	129.28	0.2	0.128326

## Sheet: HA_in_geom100
Qd_actual	Qc_actual	Qd_predicted	Qc_predicted	Qd/Qc	Qd/Qc_predicted			new values of Cross parameters, recently measured by Francesco
5	10	65.9003	98.6765	0.5	0.667842
5	20	58.5205	104.49	0.25	0.560058
5	40	44.1464	116.211	0.125	0.379881
5	60	21.32	124.91	0.0833333	0.170683
5	80	23.868	111.38	0.0625	0.214293
10	20	63.2707	102.818	0.5	0.615368
10	40	62.4067	103.549	0.25	0.60268
10	60	52.9384	115.625	0.166667	0.457845
10	80	42.4553	112.582	0.125	0.377105
10	100	21.14	124.99	0.1	0.169134
20	60	63.9227	97.5483	0.333333	0.655292
20	80	59.7113	105.512	0.25	0.56592
20	100	63.2311	120.521	0.2	0.52465
20	120	47.582	108.709	0.166667	0.437701
40	140	61.5667	87.6397	0.285714	0.702498
40	160	60.1547	108.54	0.25	0.554215
