# Supplementary material for: Dimensional analysis meets AI for non-Newtonian droplet generation
Source: Lab Chip. 2025 Feb 12;25(7):1681–93. doi: 10.1039/d4lc00946k (PMC11834948; doi:10.1039/d4lc00946k)
Supplement: LC-025-D4LC00946K-s002 [file LC-025-D4LC00946K-s002.xlsx]

## Sheet: Holdout_QdQc
Actual Qd	Actual Qc	Predicted Qd	Predicted Qc	Qd/Qc Actual	Qd/Qd Pred
10	20	21.26	41.9	0.5	0.507399
10	100	11.3	66.88	0.1	0.168959
40	60	19.91	27.3	0.666667	0.729304
10	30	11.31	45	0.333333	0.251333
5	90	6.21	82.56	0.0555556	0.075218
40	40	11.71	16.52	1	0.708838
20	80	9.8	55.36	0.25	0.177023
5	10	20.52	69.24	0.5	0.29636
5	60	5	60.42	0.0833333	0.0827541
5	50	9.51	83.76	0.1	0.113539
5	40	5.1	82.08	0.125	0.0621345
5	30	5.1	80.74	0.166667	0.0631657
20	100	9.82	55.36	0.2	0.177384
5	60	8.01	63.96	0.0833333	0.125235
5	50	5.17	51.98	0.1	0.0994613
5	90	5.08	89.36	0.0555556	0.0568487
10	20	9.88	41.92	0.5	0.235687
5	40	5.79	46.2	0.125	0.125325
5	90	5.08	89.36	0.0555556	0.0568487
5	30	5.18	31.72	0.166667	0.163304
5	20	5.27	20.3	0.25	0.259606
10	50	11.3	62.04	0.2	0.182141
5	50	5.01	51.26	0.1	0.097737
5	70	5.66	75.08	0.0714286	0.0753863
5	50	5	50.5	0.1	0.0990099
5	20	5.24	33.04	0.25	0.158596

## Sheet: 0_0178QdQc
Actual Qd	Actual Qc	Predicted Qd	Predicted Qc	Qd/Qc Actual	Qd/Qd Pred
10	10	17.76	22.53	1	0.788282
10	20	20.52	31.83	0.5	0.644675
10	30	17.86	50.3	0.333333	0.35507
10	40	13.78	48.24	0.25	0.285655
10	50	14.78	62.28	0.2	0.237315
10	60	11.74	62.62	0.166667	0.18748
10	70	8.89	80.04	0.142857	0.111069
10	80	8.56	76.12	0.125	0.112454
10	90	7.92	70.48	0.111111	0.112372
10	100	12.87	47.54	0.1	0.270719
20	20	21.04	29.62	1	0.710331
20	40	20.69	37.96	0.5	0.545047
20	60	19.85	43.96	0.333333	0.451547
20	80	18.9	59.34	0.25	0.318504
40	100	20.04	36.62	0.4	0.547242
40	80	29.68	46.7	0.5	0.635546
5	10	28.74	58.62	0.5	0.490276
5	20	14.41	47.8	0.25	0.301464
5	30	6.26	68.58	0.166667	0.0912803
5	40	5.92	69.14	0.125	0.0856234
5	50	5.89	74.06	0.1	0.0795301
5	60	8.23	77.46	0.0833333	0.106248
5	70	7.42	71.78	0.0714286	0.103371
5	80	6.57	66.1	0.0625	0.0993949
5	90	5.62	91.42	0.0555556	0.0614745
5	100	7.67	71.24	0.05	0.107664

## Sheet: 0_178QcQd
Actual Qd	Actual Qc	Predicted Qd	Predicted Qc	Qd/Qc Actual	Qd/Qd Pred
10	30	12.41	32.56	0.333333	0.381143
10	40	20.91	30.86	0.25	0.677576
10	50	13.62	30.82	0.2	0.441921
10	60	7.42	39.4	0.166667	0.188325
10	70	7.35	47.26	0.142857	0.155523
10	80	13.82	54.12	0.125	0.255358
10	90	6.26	77.2	0.111111	0.0810881
20	100	9.62	47.54	0.2	0.202356
20	40	21.64	31.48	0.5	0.687421
20	60	19.52	27.2	0.333333	0.717647
20	80	13.49	30.8	0.25	0.437987
5	10	10.76	17.57	0.5	0.612408
5	20	12.63	36.62	0.25	0.344894
5	30	7.68	48.36	0.166667	0.158809
5	40	6.6	77.9	0.125	0.084724
5	50	6.36	75.8	0.1	0.083905
5	60	7.26	62.38	0.0833333	0.116383
5	70	7.08	63.78	0.0714286	0.111007
5	80	5.6	81.06	0.0625	0.0690846
