# Supplementary material for: Dimensional analysis meets AI for non-Newtonian droplet generation
Source: Lab Chip. 2025 Feb 12;25(7):1681–93. doi: 10.1039/d4lc00946k (PMC11834948; doi:10.1039/d4lc00946k)
Supplement: LC-025-D4LC00946K-s003 [file LC-025-D4LC00946K-s003.xlsx]

## Sheet: No Surfactant
	Rheology
	Shear Rate	Shear Stress	Viscosity	Temperature	Torque	Status
								Etching Depth [um]	Width [um]	Qd [ul/min]	Qc [ul/min]	L [um]	L_SD [um]	H [um]	H_SD [um]	L/Width	L/width_SD	H/width	H/width_SD	U_d [mm/s]	U_c [mm/s]	Shear Rate_c [1/s]	Eta_d [Pa*s]	Eta_c [Pa*s]	Alpha=eta_d/eta_c	Interfacial Tension [mN*m]	Ca_d	Ca_c	q=Qd/Qc	Re_d	Re_c	Lambda_s	Wi_c	El_d	Ca_c^(-0.5)*alpha^(-0.6)*Re_c^(-0.2)*q^0.3*Wi^(-0.3)
	[1/s]	[Pa]	[Pa·s]	[°C]	[µN·m]			190	195	5	10	529.536	40.32	389.76	0	2.71557	0.206769	1.99877	0	2.24921	4.49843	23.6759	0.029	0.0299104	0.969562	25	0.00260909	0.00538199	0.5	0.0147362	0.0285754	0.034	0.804981	28.1705	24.5098
	500	4.1273	0.0082511							5	20	401.856	28.224	389.76	0	2.0608	0.144738	1.99877	0	2.24921	8.99685	47.3518		0.023831	1.2169		0.00260909	0.00857617	0.25	0.0147362	0.07173		1.60996	22.4447	9.29817
	396	3.6928	0.0093211							5	30	377.664	20.16	374.976	0	1.93674	0.103385	1.92295	0	2.24921	13.4953	71.0278		0.0204176	1.42035		0.00260909	0.0110216	0.166667	0.0147362	0.125583		2.41494	19.2298	5.24007
	315	3.2436	0.010307							5	40	373.632	13.44	362.88	0	1.91606	0.0689231	1.86092	0	2.24921	17.9937	94.7037		0.0181287	1.59967		0.00260909	0.0130481	0.125	0.0147362	0.188585		3.21993	17.0741	3.47877
	250	2.8987	0.011596							5	50	353.472	13.44	348.096	0	1.81268	0.0689231	1.78511	0	2.24921	22.4921	118.38		0.0164496	1.76296		0.00260909	0.0147994	0.1	0.0147362	0.259794		4.02491	15.4927	2.52801
	199	2.5502	0.012844							5	60	311.808	16.128	318.528	0	1.59902	0.0827077	1.63348	0	2.24921	26.9906	142.056		0.0151474	1.91452		0.00260909	0.0163535	0.0833333	0.0147362	0.338553		4.82989	14.2663	1.9458
	158	2.2552	0.014299							5	70	357.504	13.44	350.784	0	1.83335	0.0689231	1.79889	0	2.24921	31.489	165.731		0.0140985	2.05696		0.00260909	0.0177579	0.0714286	0.0147362	0.424365		5.63487	13.2784	1.55854
	125	1.9869	0.015859							5	80	275.52	16.128	244.608	0	1.41292	0.0827077	1.2544	0	2.24921	35.9874	189.407		0.0132297	2.19204		0.00260909	0.0190441	0.0625	0.0147362	0.516837		6.43985	12.4601	1.28541
	99.5	1.7403	0.017488							5	90	267.456	6.72	240.576	0	1.37157	0.0344615	1.23372	0	2.24921	40.4858	213.083		0.0124947	2.32099		0.00260909	0.0202343	0.0555556	0.0147362	0.615647		7.24483	11.7678	1.08417
	79	1.5282	0.019333							5	100	264.768	8.064	233.856	0	1.35778	0.0413538	1.19926	0	2.24921	44.9843	236.759		0.0118622	2.44474		0.00260909	0.0213445	0.05	0.0147362	0.720524		8.04981	11.1722	0.930771
	62.8	1.3328	0.021225							5	120	263.424	5.376	228.48	0	1.35089	0.0275692	1.17169	0	2.24921	53.9811	284.111		0.0108238	2.67928		0.00260909	0.0233713	0.0416667	0.0147362	0.947578		9.65978	10.1942	0.71445
	49.9	1.1589	0.023234							5	140	252.672	6.72	229.824	0	1.29575	0.0344615	1.17858	0	2.24921	62.978	331.463		0.010001	2.89971		0.00260909	0.0251937	0.0357143	0.0147362	1.19646		11.2697	9.41921	0.571005
	39.6	1.0052	0.025368							5	150	248.64	6.72	225.792	0	1.27508	0.0344615	1.15791	0	2.24921	67.4764	355.139		0.00964889	3.00553		0.00260909	0.0260429	0.0333333	0.0147362	1.3287		12.0747	9.0876	0.516438
	31.5	0.86672	0.027537							10	10				0	0	0	0	0	4.49843	4.49843	23.6759		0.0299104	0.969562		0.00521817	0.00538199	1	0.0294724	0.0285754		0.804981	28.1705	30.1751
	25	0.74364	0.029743							10	20				0	0	0	0	0	4.49843	8.99685	47.3518		0.023831	1.2169		0.00521817	0.00857617	0.5	0.0294724	0.07173		1.60996	22.4447	11.4474
	19.9	0.63425	0.031934							10	30	552.384	40.32	389.76	0	2.83274	0.206769	1.99877	0	4.49843	13.4953	71.0278		0.0204176	1.42035		0.00521817	0.0110216	0.333333	0.0294724	0.125583		2.41494	19.2298	6.45128
	15.8	0.53893	0.034159							10	40	411.264	26.88	389.76	0	2.10905	0.137846	1.99877	0	4.49843	17.9937	94.7037		0.0181287	1.59967		0.00521817	0.0130481	0.25	0.0294724	0.188585		3.21993	17.0741	4.28287
	12.5	0.45505	0.036308							10	50	381.696	21.504	389.76	0	1.95742	0.110277	1.99877	0	4.49843	22.4921	118.38		0.0164496	1.76296		0.00521817	0.0147994	0.2	0.0294724	0.259794		4.02491	15.4927	3.11235
	9.96	0.38186	0.038356							10	60	373.632	13.44	389.76	0	1.91606	0.0689231	1.99877	0	4.49843	26.9906	142.056		0.0151474	1.91452		0.00521817	0.0163535	0.166667	0.0294724	0.338553		4.82989	14.2663	2.39556
	7.91	0.31919	0.04036							10	70	346.752	16.128	349.44	0	1.77822	0.0827077	1.792	0	4.49843	31.489	165.731		0.0140985	2.05696		0.00521817	0.0177579	0.142857	0.0294724	0.424365		5.63487	13.2784	1.91879
	6.28	0.26427	0.042066							10	80	336	13.44	330.624	0	1.72308	0.0689231	1.69551	0	4.49843	35.9874	189.407		0.0132297	2.19204		0.00521817	0.0190441	0.125	0.0294724	0.516837		6.43985	12.4601	1.58252
	4.99	0.21764	0.043613							10	90	314.496	12.096	315.84	0	1.6128	0.0620308	1.61969	0	4.49843	40.4858	213.083		0.0124947	2.32099		0.00521817	0.0202343	0.111111	0.0294724	0.615647		7.24483	11.7678	1.33476
	3.96	0.17928	0.045225							10	100	303.744	12.096	302.4	0	1.55766	0.0620308	1.55077	0	4.49843	44.9843	236.759		0.0118622	2.44474		0.00521817	0.0213445	0.1	0.0294724	0.720524		8.04981	11.1722	1.14591
	3.15	0.1465	0.046493							10	120	291.648	9.408	280.896	0	1.49563	0.0482462	1.44049	0	4.49843	53.9811	284.111		0.0108238	2.67928		0.00521817	0.0233713	0.0833333	0.0294724	0.947578		9.65978	10.1942	0.879591
	2.5	0.11957	0.047758							10	140	275.52	10.752	249.984	0	1.41292	0.0551385	1.28197	0	4.49843	62.978	331.463		0.010001	2.89971		0.00521817	0.0251937	0.0714286	0.0294724	1.19646		11.2697	9.41921	0.702989
	1.99	0.096341	0.048488							10	150	267.456	6.72	243.264	0	1.37157	0.0344615	1.24751	0	4.49843	67.4764	355.139		0.00964889	3.00553		0.00521817	0.0260429	0.0666667	0.0294724	1.3287		12.0747	9.0876	0.635809
	1.58	0.078282	0.049568							20	20	868.5	19.3	389.86	0	4.45385	0.0989744	1.99928	0	8.99685	8.99685	47.3518		0.023831	1.2169		0.0104363	0.00857617	1	0.0589449	0.07173		1.60996	22.4447	14.0934
	1.25	0.063052	0.05026							20	30	579	23.16	389.86	0	2.96923	0.118769	1.99928	0	8.99685	13.4953	71.0278		0.0204176	1.42035		0.0104363	0.0110216	0.666667	0.0589449	0.125583		2.41494	19.2298	7.94246
	0.996	0.050336	0.050544							20	40	486.36	15.44	389.86	0	2.49415	0.0791795	1.99928	0	8.99685	17.9937	94.7037		0.0181287	1.59967		0.0104363	0.0130481	0.5	0.0589449	0.188585		3.21993	17.0741	5.27283
	0.792	0.040376	0.050958							20	50	420.74	7.72	389.86	0	2.15764	0.0395897	1.99928	0	8.99685	22.4921	118.38		0.0164496	1.76296		0.0104363	0.0147994	0.4	0.0589449	0.259794		4.02491	15.4927	3.83175
	0.629	0.032156	0.051132							20	60	378.28	7.72	389.86	0	1.9399	0.0395897	1.99928	0	8.99685	26.9906	142.056		0.0151474	1.91452		0.0104363	0.0163535	0.333333	0.0589449	0.338553		4.82989	14.2663	2.94928
	0.499	0.025225	0.050504							20	70	366.7	11.58	389.86	0	1.88051	0.0593846	1.99928	0	8.99685	31.489	165.731		0.0140985	2.05696		0.0104363	0.0177579	0.285714	0.0589449	0.424365		5.63487	13.2784	2.3623
	0.397	0.020605	0.051909							20	80	320.38	11.58	297.22	0	1.64297	0.0593846	1.52421	0	8.99685	35.9874	189.407		0.0132297	2.19204		0.0104363	0.0190441	0.25	0.0589449	0.516837		6.43985	12.4601	1.94832
	0.316	0.016318	0.051671							20	90	297.22	11.58	277.92	0	1.52421	0.0593846	1.42523	0	8.99685	40.4858	213.083		0.0124947	2.32099		0.0104363	0.0202343	0.222222	0.0589449	0.615647		7.24483	11.7678	1.64329
	0.251	0.012709	0.050663							20	100	281.78	11.58	258.62	0	1.44503	0.0593846	1.32626	0	8.99685	44.9843	236.759		0.0118622	2.44474		0.0104363	0.0213445	0.2	0.0589449	0.720524		8.04981	11.1722	1.41079
	0.199	0.010452	0.05241							20	120	301.08	7.72	270.2	0	1.544	0.0395897	1.38564	0	8.99685	53.9811	284.111		0.0108238	2.67928		0.0104363	0.0233713	0.166667	0.0589449	0.947578		9.65978	10.1942	1.0829
	0.158	0.0082648	0.052227							20	140	281.78	11.58	262.48	0	1.44503	0.0593846	1.34605	0	8.99685	62.978	331.463		0.010001	2.89971		0.0104363	0.0251937	0.142857	0.0589449	1.19646		11.2697	9.41921	0.865481
	0.126	0.0070027	0.055722							20	150	270.2	11.58	258.62	0	1.38564	0.0593846	1.32626	0	8.99685	67.4764	355.139		0.00964889	3.00553		0.0104363	0.0260429	0.133333	0.0589449	1.3287		12.0747	9.0876	0.782773
	0.0999	0.0053742	0.053811							40	40	907.1	23.16	389.86	0	4.65179	0.118769	1.99928	0	17.9937	17.9937	94.7037		0.0181287	1.59967		0.0208727	0.0130481	1	0.11789	0.188585		3.21993	17.0741	6.49161
	0.0793	0.0043499	0.054878							40	50	883.94	19.3	389.86	0	4.53303	0.0989744	1.99928	0	17.9937	22.4921	118.38		0.0164496	1.76296		0.0208727	0.0147994	0.8	0.11789	0.259794		4.02491	15.4927	4.71743
	0.063	0.0036607	0.05815							40	60	687.08	11.58	389.86	0	3.52349	0.0593846	1.99928	0	17.9937	26.9906	142.056		0.0151474	1.91452		0.0208727	0.0163535	0.666667	0.11789	0.338553		4.82989	14.2663	3.63099
	0.05	0.0033538	0.067058							40	70	602.16	15.44	389.86	0	3.088	0.0791795	1.99928	0	17.9937	31.489	165.731		0.0140985	2.05696		0.0208727	0.0177579	0.571429	0.11789	0.424365		5.63487	13.2784	2.90834
										40	80	528.82	11.58	389.86	0	2.7119	0.0593846	1.99928	0	17.9937	35.9874	189.407		0.0132297	2.19204		0.0208727	0.0190441	0.5	0.11789	0.516837		6.43985	12.4601	2.39866
										40	90	482.5	11.58	389.86	0	2.47436	0.0593846	1.99928	0	17.9937	40.4858	213.083		0.0124947	2.32099		0.0208727	0.0202343	0.444444	0.11789	0.615647		7.24483	11.7678	2.02312
										40	100	386	11.58	389.86	0	1.97949	0.0593846	1.99928	0	17.9937	44.9843	236.759		0.0118622	2.44474		0.0208727	0.0213445	0.4	0.11789	0.720524		8.04981	11.1722	1.73688
	Cross Model Viscosity									40	120	374.42	15.44	389.86	0	1.9201	0.0791795	1.99928	0	17.9937	53.9811	284.111		0.0108238	2.67928		0.0208727	0.0233713	0.333333	0.11789	0.947578		9.65978	10.1942	1.33321
	\eta=0.056/(1+(0.034*x)^0.63)									40	140	324.24	11.58	301.08	0	1.66277	0.0593846	1.544	0	17.9937	62.978	331.463		0.010001	2.89971		0.0208727	0.0251937	0.285714	0.11789	1.19646		11.2697	9.41921	1.06553
										40	150	316.52	11.58	293.36	0	1.62318	0.0593846	1.50441	0	17.9937	67.4764	355.139		0.00964889	3.00553		0.0208727	0.0260429	0.266667	0.11789	1.3287		12.0747	9.0876	0.963707
										60	60	965	19.3	389.86	0	4.94872	0.0989744	1.99928	0	26.9906	26.9906	142.056		0.0151474	1.91452		0.031309	0.0163535	1	0.176835	0.338553		4.82989	14.2663	4.10065
										60	70	810.6	27.02	389.86	0	4.15692	0.138564	1.99928	0	26.9906	31.489	165.731		0.0140985	2.05696		0.031309	0.0177579	0.857143	0.176835	0.424365		5.63487	13.2784	3.28452
										60	80	744.98	23.16	389.86	0	3.82041	0.118769	1.99928	0	26.9906	35.9874	189.407		0.0132297	2.19204		0.031309	0.0190441	0.75	0.176835	0.516837		6.43985	12.4601	2.70892
										60	90	652.34	23.16	389.86	0	3.34533	0.118769	1.99928	0	26.9906	40.4858	213.083		0.0124947	2.32099		0.031309	0.0202343	0.666667	0.176835	0.615647		7.24483	11.7678	2.28481
										60	100	644.62	19.3	389.86	0	3.30574	0.0989744	1.99928	0	26.9906	44.9843	236.759		0.0118622	2.44474		0.031309	0.0213445	0.6	0.176835	0.720524		8.04981	11.1722	1.96154
										60	120	617.6	15.44	389.86	0	3.16718	0.0791795	1.99928	0	26.9906	53.9811	284.111		0.0108238	2.67928		0.031309	0.0233713	0.5	0.176835	0.947578		9.65978	10.1942	1.50566
										60	140	551.98	15.44	389.86	0	2.83067	0.0791795	1.99928	0	26.9906	62.978	331.463		0.010001	2.89971		0.031309	0.0251937	0.428571	0.176835	1.19646		11.2697	9.41921	1.20336
										60	150	505.66	15.44	389.86	0	2.59313	0.0791795	1.99928	0	26.9906	67.4764	355.139		0.00964889	3.00553		0.031309	0.0260429	0.4	0.176835	1.3287		12.0747	9.0876	1.08836
										80	80				0	0	0	0	0	35.9874	35.9874	189.407		0.0132297	2.19204		0.0417454	0.0190441	1	0.23578	0.516837		6.43985	12.4601	2.9531
										80	90	814.46	30.88	389.86	0	4.17672	0.158359	1.99928	0	35.9874	40.4858	213.083		0.0124947	2.32099		0.0417454	0.0202343	0.888889	0.23578	0.615647		7.24483	11.7678	2.49076
										80	100	779.72	15.44	389.86	0	3.99856	0.0791795	1.99928	0	35.9874	44.9843	236.759		0.0118622	2.44474		0.0417454	0.0213445	0.8	0.23578	0.720524		8.04981	11.1722	2.13835
										80	120	648.48	15.44	389.86	0	3.32554	0.0791795	1.99928	0	35.9874	53.9811	284.111		0.0108238	2.67928		0.0417454	0.0233713	0.666667	0.23578	0.947578		9.65978	10.1942	1.64138
										80	140	579	19.3	389.86	0	2.96923	0.0989744	1.99928	0	35.9874	62.978	331.463		0.010001	2.89971		0.0417454	0.0251937	0.571429	0.23578	1.19646		11.2697	9.41921	1.31182
										80	150	540.4	15.44	389.86	0	2.77128	0.0791795	1.99928	0	35.9874	67.4764	355.139		0.00964889	3.00553		0.0417454	0.0260429	0.533333	0.23578	1.3287		12.0747	9.0876	1.18646
										100	100				0	0	0	0	0	44.9843	44.9843	236.759		0.0118622	2.44474		0.0521817	0.0213445	1	0.294724	0.720524		8.04981	11.1722	2.2864
										100	120				0	0	0	0	0	44.9843	53.9811	284.111		0.0108238	2.67928		0.0521817	0.0233713	0.833333	0.294724	0.947578		9.65978	10.1942	1.75501
										100	140	741.12	19.3	389.86	0	3.80062	0.0989744	1.99928	0	44.9843	62.978	331.463		0.010001	2.89971		0.0521817	0.0251937	0.714286	0.294724	1.19646		11.2697	9.41921	1.40265
										100	150	625.32	19.3	389.86	0	3.20677	0.0989744	1.99928	0	44.9843	67.4764	355.139		0.00964889	3.00553		0.0521817	0.0260429	0.666667	0.294724	1.3287		12.0747	9.0876	1.26861

## Sheet: Span0pt03
	Rheology
	Shear Rate	Shear Stress	Viscosity	Temperature	Torque	Status
								Etching Depth [um]	Width [um]	Qd [ul/min]	Qc [ul/min]	L [um]	L_SD [um]	H [um]	H_SD [um]	L/Width	L/width_SD	H/width	H/width_SD	U_d [mm/s]	U_c [mm/s]	Shear Rate_c [1/s]	Eta_d [Pa*s]	Eta_c [Pa*s]	Alpha=eta_d/eta_c	Interfacial Tension [mN*m]	Ca_d	Ca_c	q=Qd/Qc	Re_d	Re_c	Lambda_s	Wi_c	El_d	Ca_c^(-0.5)*alpha^(-0.6)*Re_c^(-0.2)*q^0.3*Wi^(-0.3)
	[1/s]	[Pa]	[Pa·s]	[°C]	[µN·m]			190	195	5	10	686.381	33.6	389.76	0	3.5199	0.172308	1.99877	0	2.24921	4.49843	23.6759	0.029	0.0299104	0.969562	9.07	0.00719153	0.0148346	0.5	0.0147362	0.0285754	0.034	0.804981	28.1705	14.763
	500	4.1273	0.0082511							5	20	518.381	20.16	389.76	0	2.65836	0.103385	1.99877	0	2.24921	8.99685	47.3518		0.023831	1.2169		0.00719153	0.0236388	0.25	0.0147362	0.07173		1.60996	22.4447	5.60055
	396	3.6928	0.0093211							5	30	459.917	26.88	389.76	0	2.35855	0.137846	1.99877	0	2.24921	13.4953	71.0278		0.0204176	1.42035		0.00719153	0.0303794	0.166667	0.0147362	0.125583		2.41494	19.2298	3.15624
	315	3.2436	0.010307							5	40	397.555	12.096	389.76	0	2.03874	0.0620308	1.99877	0	2.24921	17.9937	94.7037		0.0181287	1.59967		0.00719153	0.035965	0.125	0.0147362	0.188585		3.21993	17.0741	2.09536
	250	2.8987	0.011596							5	50	346.886	20.16	389.76	0	1.7789	0.103385	1.99877	0	2.24921	22.4921	118.38		0.0164496	1.76296		0.00719153	0.0407923	0.1	0.0147362	0.259794		4.02491	15.4927	1.52269
	199	2.5502	0.012844							5	60	336.134	13.44	389.76	0	1.72377	0.0689231	1.99877	0	2.24921	26.9906	142.056		0.0151474	1.91452		0.00719153	0.0450758	0.0833333	0.0147362	0.338553		4.82989	14.2663	1.17201
	158	2.2552	0.014299							5	70	333.312	8.064	380.352	0	1.70929	0.0413538	1.95052	0	2.24921	31.489	165.731		0.0140985	2.05696		0.00719153	0.0489468	0.0714286	0.0147362	0.424365		5.63487	13.2784	0.938753
	125	1.9869	0.015859							5	80	330.893	10.752	322.56	0	1.69689	0.0551385	1.65415	0	2.24921	35.9874	189.407		0.0132297	2.19204		0.00719153	0.0524921	0.0625	0.0147362	0.516837		6.43985	12.4601	0.774239
	99.5	1.7403	0.017488							5	90	325.248	6.72	319.603	0	1.66794	0.0344615	1.63899	0	2.24921	40.4858	213.083		0.0124947	2.32099		0.00719153	0.0557725	0.0555556	0.0147362	0.615647		7.24483	11.7678	0.653024
	79	1.5282	0.019333							5	100	304.013	5.376	279.552	0	1.55904	0.0275692	1.4336	0	2.24921	44.9843	236.759		0.0118622	2.44474		0.00719153	0.0588327	0.05	0.0147362	0.720524		8.04981	11.1722	0.56063
	62.8	1.3328	0.021225							5	120	283.584	6.72	267.456	0	1.45428	0.0344615	1.37157	0	2.24921	53.9811	284.111		0.0108238	2.67928		0.00719153	0.0644191	0.0416667	0.0147362	0.947578		9.65978	10.1942	0.430334
	49.9	1.1589	0.023234							5	140	244.608	6.72	235.2	0	1.2544	0.0344615	1.20615	0	2.24921	62.978	331.463		0.010001	2.89971		0.00719153	0.0694423	0.0357143	0.0147362	1.19646		11.2697	9.41921	0.343933
	39.6	1.0052	0.025368							5	150	239.232	5.376	229.824	0	1.22683	0.0275692	1.17858	0	2.24921	67.4764	355.139		0.00964889	3.00553		0.00719153	0.0717831	0.0333333	0.0147362	1.3287		12.0747	9.0876	0.311065
	31.5	0.86672	0.027537							10	10				0	0	0	0	0	4.49843	4.49843	23.6759		0.0299104	0.969562		0.0143831	0.0148346	1	0.0294724	0.0285754		0.804981	28.1705	18.1753
	25	0.74364	0.029743							10	20				0	0	0	0	0	4.49843	8.99685	47.3518		0.023831	1.2169		0.0143831	0.0236388	0.5	0.0294724	0.07173		1.60996	22.4447	6.89509
	19.9	0.63425	0.031934							10	30	790.272	37.632	389.76	0	4.05268	0.192985	1.99877	0	4.49843	13.4953	71.0278		0.0204176	1.42035		0.0143831	0.0303794	0.333333	0.0294724	0.125583		2.41494	19.2298	3.88579
	15.8	0.53893	0.034159							10	40	700.224	22.848	389.76	0	3.59089	0.117169	1.99877	0	4.49843	17.9937	94.7037		0.0181287	1.59967		0.0143831	0.035965	0.25	0.0294724	0.188585		3.21993	17.0741	2.57969
	12.5	0.45505	0.036308							10	50	478.464	21.504	389.76	0	2.45366	0.110277	1.99877	0	4.49843	22.4921	118.38		0.0164496	1.76296		0.0143831	0.0407923	0.2	0.0294724	0.259794		4.02491	15.4927	1.87466
	9.96	0.38186	0.038356							10	60	396.48	16.128	389.76	0	2.03323	0.0827077	1.99877	0	4.49843	26.9906	142.056		0.0151474	1.91452		0.0143831	0.0450758	0.166667	0.0294724	0.338553		4.82989	14.2663	1.44292
	7.91	0.31919	0.04036							10	70	385.728	13.44	389.76	0	1.97809	0.0689231	1.99877	0	4.49843	31.489	165.731		0.0140985	2.05696		0.0143831	0.0489468	0.142857	0.0294724	0.424365		5.63487	13.2784	1.15574
	6.28	0.26427	0.042066							10	80	344.064	12.096	389.76	0	1.76443	0.0620308	1.99877	0	4.49843	35.9874	189.407		0.0132297	2.19204		0.0143831	0.0524921	0.125	0.0294724	0.516837		6.43985	12.4601	0.9532
	4.99	0.21764	0.043613							10	90	329.28	10.752	325.248	0	1.68862	0.0551385	1.66794	0	4.49843	40.4858	213.083		0.0124947	2.32099		0.0143831	0.0557725	0.111111	0.0294724	0.615647		7.24483	11.7678	0.803967
	3.96	0.17928	0.045225							10	100	305.088	12.096	288.96	0	1.56455	0.0620308	1.48185	0	4.49843	44.9843	236.759		0.0118622	2.44474		0.0143831	0.0588327	0.1	0.0294724	0.720524		8.04981	11.1722	0.690217
	3.15	0.1465	0.046493							10	120	291.648	9.408	279.552	0	1.49563	0.0482462	1.4336	0	4.49843	53.9811	284.111		0.0108238	2.67928		0.0143831	0.0644191	0.0833333	0.0294724	0.947578		9.65978	10.1942	0.529803
	2.5	0.11957	0.047758							10	140	295.68	9.408	283.584	0	1.51631	0.0482462	1.45428	0	4.49843	62.978	331.463		0.010001	2.89971		0.0143831	0.0694423	0.0714286	0.0294724	1.19646		11.2697	9.41921	0.423431
	1.99	0.096341	0.048488							10	150	287.616	8.064	256.704	0	1.47495	0.0413538	1.31643	0	4.49843	67.4764	355.139		0.00964889	3.00553		0.0143831	0.0717831	0.0666667	0.0294724	1.3287		12.0747	9.0876	0.382966
	1.58	0.078282	0.049568							20	20				0	0	0	0	0	8.99685	8.99685	47.3518		0.023831	1.2169		0.0287661	0.0236388	1	0.0589449	0.07173		1.60996	22.4447	8.48885
	1.25	0.063052	0.05026							20	30	617.6	19.3	389.86	0	3.16718	0.0989744	1.99928	0	8.99685	13.4953	71.0278		0.0204176	1.42035		0.0287661	0.0303794	0.666667	0.0589449	0.125583		2.41494	19.2298	4.78397
	0.996	0.050336	0.050544							20	40	548.12	15.44	389.86	0	2.81087	0.0791795	1.99928	0	8.99685	17.9937	94.7037		0.0181287	1.59967		0.0287661	0.035965	0.5	0.0589449	0.188585		3.21993	17.0741	3.17598
	0.792	0.040376	0.050958							20	50	474.78	11.58	389.86	0	2.43477	0.0593846	1.99928	0	8.99685	22.4921	118.38		0.0164496	1.76296		0.0287661	0.0407923	0.4	0.0589449	0.259794		4.02491	15.4927	2.30797
	0.629	0.032156	0.051132							20	60	440.04	11.58	389.86	0	2.25662	0.0593846	1.99928	0	8.99685	26.9906	142.056		0.0151474	1.91452		0.0287661	0.0450758	0.333333	0.0589449	0.338553		4.82989	14.2663	1.77644
	0.499	0.025225	0.050504							20	70	401.44	7.72	389.86	0	2.05867	0.0395897	1.99928	0	8.99685	31.489	165.731		0.0140985	2.05696		0.0287661	0.0489468	0.285714	0.0589449	0.424365		5.63487	13.2784	1.42288
	0.397	0.020605	0.051909							20	80	386	7.72	389.86	0	1.97949	0.0395897	1.99928	0	8.99685	35.9874	189.407		0.0132297	2.19204		0.0287661	0.0524921	0.25	0.0589449	0.516837		6.43985	12.4601	1.17353
	0.316	0.016318	0.051671							20	90	366.7	11.58	389.86	0	1.88051	0.0593846	1.99928	0	8.99685	40.4858	213.083		0.0124947	2.32099		0.0287661	0.0557725	0.222222	0.0589449	0.615647		7.24483	11.7678	0.989799
	0.251	0.012709	0.050663							20	100	343.54	7.72	339.68	0	1.76174	0.0395897	1.74195	0	8.99685	44.9843	236.759		0.0118622	2.44474		0.0287661	0.0588327	0.2	0.0589449	0.720524		8.04981	11.1722	0.849757
	0.199	0.010452	0.05241							20	120	335.82	7.72	324.24	0	1.72215	0.0395897	1.66277	0	8.99685	53.9811	284.111		0.0108238	2.67928		0.0287661	0.0644191	0.166667	0.0589449	0.947578		9.65978	10.1942	0.652264
	0.158	0.0082648	0.052227							20	140	320.38	7.72	281.78	0	1.64297	0.0395897	1.44503	0	8.99685	62.978	331.463		0.010001	2.89971		0.0287661	0.0694423	0.142857	0.0589449	1.19646		11.2697	9.41921	0.521304
	0.126	0.0070027	0.055722							20	150	289.5	11.58	258.62	0	1.48462	0.0593846	1.32626	0	8.99685	67.4764	355.139		0.00964889	3.00553		0.0287661	0.0717831	0.133333	0.0589449	1.3287		12.0747	9.0876	0.471487
	0.0999	0.0053742	0.053811							40	40				0	0	0	0	0	17.9937	17.9937	94.7037		0.0181287	1.59967		0.0575322	0.035965	1	0.11789	0.188585		3.21993	17.0741	3.91008
	0.0793	0.0043499	0.054878							40	50				0	0	0	0	0	17.9937	22.4921	118.38		0.0164496	1.76296		0.0575322	0.0407923	0.8	0.11789	0.259794		4.02491	15.4927	2.84145
	0.063	0.0036607	0.05815							40	60	687.08	19.3	389.86	0	3.52349	0.0989744	1.99928	0	17.9937	26.9906	142.056		0.0151474	1.91452		0.0575322	0.0450758	0.666667	0.11789	0.338553		4.82989	14.2663	2.18705
	0.05	0.0033538	0.067058							40	70	586.72	11.58	389.86	0	3.00882	0.0593846	1.99928	0	17.9937	31.489	165.731		0.0140985	2.05696		0.0575322	0.0489468	0.571429	0.11789	0.424365		5.63487	13.2784	1.75178
										40	80	497.94	15.44	389.86	0	2.55354	0.0791795	1.99928	0	17.9937	35.9874	189.407		0.0132297	2.19204		0.0575322	0.0524921	0.5	0.11789	0.516837		6.43985	12.4601	1.44478
										40	90	459.34	7.72	389.86	0	2.35559	0.0395897	1.99928	0	17.9937	40.4858	213.083		0.0124947	2.32099		0.0575322	0.0557725	0.444444	0.11789	0.615647		7.24483	11.7678	1.21859
										40	100	440.04	11.58	389.86	0	2.25662	0.0593846	1.99928	0	17.9937	44.9843	236.759		0.0118622	2.44474		0.0575322	0.0588327	0.4	0.11789	0.720524		8.04981	11.1722	1.04617
	Cross Model Viscosity									40	120	413.02	11.58	389.86	0	2.11805	0.0593846	1.99928	0	17.9937	53.9811	284.111		0.0108238	2.67928		0.0575322	0.0644191	0.333333	0.11789	0.947578		9.65978	10.1942	0.803031
	\eta=0.056/(1+(0.034*x)^0.63)									40	140	409.16	11.58	389.86	0	2.09826	0.0593846	1.99928	0	17.9937	62.978	331.463		0.010001	2.89971		0.0575322	0.0694423	0.285714	0.11789	1.19646		11.2697	9.41921	0.641801
										40	150	374.42	7.72	362.84	0	1.9201	0.0395897	1.86072	0	17.9937	67.4764	355.139		0.00964889	3.00553		0.0575322	0.0717831	0.266667	0.11789	1.3287		12.0747	9.0876	0.580468
										60	60				0	0	0	0	0	26.9906	26.9906	142.056		0.0151474	1.91452		0.0862984	0.0450758	1	0.176835	0.338553		4.82989	14.2663	2.46994
										60	70				0	0	0	0	0	26.9906	31.489	165.731		0.0140985	2.05696		0.0862984	0.0489468	0.857143	0.176835	0.424365		5.63487	13.2784	1.97836
										60	80				0	0	0	0	0	26.9906	35.9874	189.407		0.0132297	2.19204		0.0862984	0.0524921	0.75	0.176835	0.516837		6.43985	12.4601	1.63166
										60	90				0	0	0	0	0	26.9906	40.4858	213.083		0.0124947	2.32099		0.0862984	0.0557725	0.666667	0.176835	0.615647		7.24483	11.7678	1.37621
										60	100				0	0	0	0	0	26.9906	44.9843	236.759		0.0118622	2.44474		0.0862984	0.0588327	0.6	0.176835	0.720524		8.04981	11.1722	1.18149
										60	120				0	0	0	0	0	26.9906	53.9811	284.111		0.0108238	2.67928		0.0862984	0.0644191	0.5	0.176835	0.947578		9.65978	10.1942	0.906901
										60	140	582.86	11.58	389.86	0	2.98903	0.0593846	1.99928	0	26.9906	62.978	331.463		0.010001	2.89971		0.0862984	0.0694423	0.428571	0.176835	1.19646		11.2697	9.41921	0.724816
										60	150	436.18	11.58	389.86	0	2.23682	0.0593846	1.99928	0	26.9906	67.4764	355.139		0.00964889	3.00553		0.0862984	0.0717831	0.4	0.176835	1.3287		12.0747	9.0876	0.65555
										80	80				0	0	0	0	0	35.9874	35.9874	189.407		0.0132297	2.19204		0.115064	0.0524921	1	0.23578	0.516837		6.43985	12.4601	1.77873
										80	90				0	0	0	0	0	35.9874	40.4858	213.083		0.0124947	2.32099		0.115064	0.0557725	0.888889	0.23578	0.615647		7.24483	11.7678	1.50026
										80	100				0	0	0	0	0	35.9874	44.9843	236.759		0.0118622	2.44474		0.115064	0.0588327	0.8	0.23578	0.720524		8.04981	11.1722	1.28799
										80	120				0	0	0	0	0	35.9874	53.9811	284.111		0.0108238	2.67928		0.115064	0.0644191	0.666667	0.23578	0.947578		9.65978	10.1942	0.988647
										80	140	594.44	11.58	389.86	0	3.04841	0.0593846	1.99928	0	35.9874	62.978	331.463		0.010001	2.89971		0.115064	0.0694423	0.571429	0.23578	1.19646		11.2697	9.41921	0.79015
										80	150	571.28	11.58	389.86	0	2.92964	0.0593846	1.99928	0	35.9874	67.4764	355.139		0.00964889	3.00553		0.115064	0.0717831	0.533333	0.23578	1.3287		12.0747	9.0876	0.71464
										100	100				0	0	0	0	0	44.9843	44.9843	236.759		0.0118622	2.44474		0.143831	0.0588327	1	0.294724	0.720524		8.04981	11.1722	1.37716
										100	120				0	0	0	0	0	44.9843	53.9811	284.111		0.0108238	2.67928		0.143831	0.0644191	0.833333	0.294724	0.947578		9.65978	10.1942	1.0571
										100	140	698.66	11.58	389.86	0	3.58287	0.0593846	1.99928	0	44.9843	62.978	331.463		0.010001	2.89971		0.143831	0.0694423	0.714286	0.294724	1.19646		11.2697	9.41921	0.844855
										100	150				0	0	0	0	0	44.9843	67.4764	355.139		0.00964889	3.00553		0.143831	0.0717831	0.666667	0.294724	1.3287		12.0747	9.0876	0.764118

## Sheet: Span0pt3
	Rheology
	Shear Rate	Shear Stress	Viscosity	Temperature	Torque	Status
								Etching Depth [um]	Width [um]	Qd [ul/min]	Qc [ul/min]	L [um]	L_SD [um]	H [um]	H_SD [um]	L/Width	L/width_SD	H/width	H/width_SD	U_d [mm/s]	U_c [mm/s]	Shear Rate_c [1/s]	Eta_d [Pa*s]	Eta_c [Pa*s]	Alpha=eta_d/eta_c	Interfacial Tension [mN*m]	Ca_d	Ca_c	q=Qd/Qc	Re_d	Re_c	Lambda_s	Wi_c	El_d	Ca_c^(-0.5)*alpha^(-0.6)*Re_c^(-0.2)*q^0.3*Wi^(-0.3)
	[1/s]	[Pa]	[Pa·s]	[°C]	[µN·m]			190	195	5	10	482.496	13.44	389.76	0	2.47434	0.0689231	1.99877	0	2.24921	4.49843	23.6759	0.029	0.0299104	0.969562	4.51	0.0144628	0.0298336	0.5	0.0147362	0.0285754	0.034	0.804981	28.1705	10.4102
	500	4.1273	0.0082511							5	20	376.32	8.064	383.04	0	1.92985	0.0413538	1.96431	0	2.24921	8.99685	47.3518		0.023831	1.2169		0.0144628	0.0475398	0.25	0.0147362	0.07173		1.60996	22.4447	3.94926
	396	3.6928	0.0093211							5	30	307.776	9.408	299.712	0	1.57834	0.0482462	1.53698	0	2.24921	13.4953	71.0278		0.0204176	1.42035		0.0144628	0.0610955	0.166667	0.0147362	0.125583		2.41494	19.2298	2.22564
	315	3.2436	0.010307							5	40	272.832	10.752	263.424	0	1.39914	0.0551385	1.35089	0	2.24921	17.9937	94.7037		0.0181287	1.59967		0.0144628	0.0723288	0.125	0.0147362	0.188585		3.21993	17.0741	1.47756
	250	2.8987	0.011596							5	50	268.8	8.064	258.048	0	1.37846	0.0413538	1.32332	0	2.24921	22.4921	118.38		0.0164496	1.76296		0.0144628	0.0820368	0.1	0.0147362	0.259794		4.02491	15.4927	1.07373
	199	2.5502	0.012844							5	60	225.792	6.72	225.792	0	1.15791	0.0344615	1.15791	0	2.24921	26.9906	142.056		0.0151474	1.91452		0.0144628	0.0906513	0.0833333	0.0147362	0.338553		4.82989	14.2663	0.82645
	158	2.2552	0.014299							5	70	229.824	5.376	229.824	0	1.17858	0.0275692	1.17858	0	2.24921	31.489	165.731		0.0140985	2.05696		0.0144628	0.0984362	0.0714286	0.0147362	0.424365		5.63487	13.2784	0.661966
	125	1.9869	0.015859							5	80	213.696	5.376	212.352	0	1.09588	0.0275692	1.08898	0	2.24921	35.9874	189.407		0.0132297	2.19204		0.0144628	0.105566	0.0625	0.0147362	0.516837		6.43985	12.4601	0.545959
	99.5	1.7403	0.017488							5	90	196.224	4.032	194.88	0	1.00628	0.0206769	0.999385	0	2.24921	40.4858	213.083		0.0124947	2.32099		0.0144628	0.112163	0.0555556	0.0147362	0.615647		7.24483	11.7678	0.460483
	79	1.5282	0.019333							5	100	192.192	5.376	190.848	0	0.9856	0.0275692	0.978708	0	2.24921	44.9843	236.759		0.0118622	2.44474		0.0144628	0.118318	0.05	0.0147362	0.720524		8.04981	11.1722	0.395331
	62.8	1.3328	0.021225							5	120	188.16	5.376	186.816	0	0.964923	0.0275692	0.958031	0	2.24921	53.9811	284.111		0.0108238	2.67928		0.0144628	0.129552	0.0416667	0.0147362	0.947578		9.65978	10.1942	0.303452
	49.9	1.1589	0.023234							5	140	188.16	4.032	185.472	0	0.964923	0.0206769	0.951138	0	2.24921	62.978	331.463		0.010001	2.89971		0.0144628	0.139654	0.0357143	0.0147362	1.19646		11.2697	9.41921	0.242526
	39.6	1.0052	0.025368							5	150	177.408	4.032	173.376	0	0.909785	0.0206769	0.889108	0	2.24921	67.4764	355.139		0.00964889	3.00553		0.0144628	0.144362	0.0333333	0.0147362	1.3287		12.0747	9.0876	0.219349
	31.5	0.86672	0.027537							10	10				0	0	0	0	0	4.49843	4.49843	23.6759		0.0299104	0.969562		0.0289256	0.0298336	1	0.0294724	0.0285754		0.804981	28.1705	12.8164
	25	0.74364	0.029743							10	20	974.4	60.48	389.76	0	4.99692	0.310154	1.99877	0	4.49843	8.99685	47.3518		0.023831	1.2169		0.0289256	0.0475398	0.5	0.0294724	0.07173		1.60996	22.4447	4.86211
	19.9	0.63425	0.031934							10	30	756.672	51.072	389.76	0	3.88037	0.261908	1.99877	0	4.49843	13.4953	71.0278		0.0204176	1.42035		0.0289256	0.0610955	0.333333	0.0294724	0.125583		2.41494	19.2298	2.74009
	15.8	0.53893	0.034159							10	40	538.944	26.88	389.76	0	2.76382	0.137846	1.99877	0	4.49843	17.9937	94.7037		0.0181287	1.59967		0.0289256	0.0723288	0.25	0.0294724	0.188585		3.21993	17.0741	1.81908
	12.5	0.45505	0.036308							10	50	409.92	13.44	389.76	0	2.10215	0.0689231	1.99877	0	4.49843	22.4921	118.38		0.0164496	1.76296		0.0289256	0.0820368	0.2	0.0294724	0.259794		4.02491	15.4927	1.32192
	9.96	0.38186	0.038356							10	60	373.632	16.128	356.16	0	1.91606	0.0827077	1.82646	0	4.49843	26.9906	142.056		0.0151474	1.91452		0.0289256	0.0906513	0.166667	0.0294724	0.338553		4.82989	14.2663	1.01748
	7.91	0.31919	0.04036							10	70	323.904	13.44	317.184	0	1.66105	0.0689231	1.62658	0	4.49843	31.489	165.731		0.0140985	2.05696		0.0289256	0.0984362	0.142857	0.0294724	0.424365		5.63487	13.2784	0.814976
	6.28	0.26427	0.042066							10	80	317.184	8.064	305.088	0	1.62658	0.0413538	1.56455	0	4.49843	35.9874	189.407		0.0132297	2.19204		0.0289256	0.105566	0.125	0.0294724	0.516837		6.43985	12.4601	0.672154
	4.99	0.21764	0.043613							10	90	309.12	9.408	295.68	0	1.58523	0.0482462	1.51631	0	4.49843	40.4858	213.083		0.0124947	2.32099		0.0289256	0.112163	0.111111	0.0294724	0.615647		7.24483	11.7678	0.566921
	3.96	0.17928	0.045225							10	100	301.056	9.408	280.896	0	1.54388	0.0482462	1.44049	0	4.49843	44.9843	236.759		0.0118622	2.44474		0.0289256	0.118318	0.1	0.0294724	0.720524		8.04981	11.1722	0.48671
	3.15	0.1465	0.046493							10	120	260.736	8.064	260.736	0	1.33711	0.0413538	1.33711	0	4.49843	53.9811	284.111		0.0108238	2.67928		0.0289256	0.129552	0.0833333	0.0294724	0.947578		9.65978	10.1942	0.373593
	2.5	0.11957	0.047758							10	140	231.168	9.408	225.792	0	1.18548	0.0482462	1.15791	0	4.49843	62.978	331.463		0.010001	2.89971		0.0289256	0.139654	0.0714286	0.0294724	1.19646		11.2697	9.41921	0.298584
	1.99	0.096341	0.048488							10	150	205.632	8.064	205.632	0	1.05452	0.0413538	1.05452	0	4.49843	67.4764	355.139		0.00964889	3.00553		0.0289256	0.144362	0.0666667	0.0294724	1.3287		12.0747	9.0876	0.270051
	1.58	0.078282	0.049568							20	20	679.36	11.58	389.86	0	3.4839	0.0593846	1.99928	0	8.99685	8.99685	47.3518		0.023831	1.2169		0.0578511	0.0475398	1	0.0589449	0.07173		1.60996	22.4447	5.98596
	1.25	0.063052	0.05026							20	30	625.32	11.58	389.86	0	3.20677	0.0593846	1.99928	0	8.99685	13.4953	71.0278		0.0204176	1.42035		0.0578511	0.0610955	0.666667	0.0589449	0.125583		2.41494	19.2298	3.37344
	0.996	0.050336	0.050544							20	40	474.78	15.44	389.86	0	2.43477	0.0791795	1.99928	0	8.99685	17.9937	94.7037		0.0181287	1.59967		0.0578511	0.0723288	0.5	0.0589449	0.188585		3.21993	17.0741	2.23956
	0.792	0.040376	0.050958							20	50	440.04	11.58	389.86	0	2.25662	0.0593846	1.99928	0	8.99685	22.4921	118.38		0.0164496	1.76296		0.0578511	0.0820368	0.4	0.0589449	0.259794		4.02491	15.4927	1.62748
	0.629	0.032156	0.051132							20	60	413.02	7.72	389.86	0	2.11805	0.0395897	1.99928	0	8.99685	26.9906	142.056		0.0151474	1.91452		0.0578511	0.0906513	0.333333	0.0589449	0.338553		4.82989	14.2663	1.25266
	0.499	0.025225	0.050504							20	70	397.58	7.72	389.86	0	2.03887	0.0395897	1.99928	0	8.99685	31.489	165.731		0.0140985	2.05696		0.0578511	0.0984362	0.285714	0.0589449	0.424365		5.63487	13.2784	1.00335
	0.397	0.020605	0.051909							20	80	355.12	7.72	386	0	1.82113	0.0395897	1.97949	0	8.99685	35.9874	189.407		0.0132297	2.19204		0.0578511	0.105566	0.25	0.0589449	0.516837		6.43985	12.4601	0.827519
	0.316	0.016318	0.051671							20	90	347.4	7.72	378.28	0	1.78154	0.0395897	1.9399	0	8.99685	40.4858	213.083		0.0124947	2.32099		0.0578511	0.112163	0.222222	0.0589449	0.615647		7.24483	11.7678	0.697962
	0.251	0.012709	0.050663							20	100	343.54	7.72	301.08	0	1.76174	0.0395897	1.544	0	8.99685	44.9843	236.759		0.0118622	2.44474		0.0578511	0.118318	0.2	0.0589449	0.720524		8.04981	11.1722	0.59921
	0.199	0.010452	0.05241							20	120	320.38	11.58	289.5	0	1.64297	0.0593846	1.48462	0	8.99685	53.9811	284.111		0.0108238	2.67928		0.0578511	0.129552	0.166667	0.0589449	0.947578		9.65978	10.1942	0.459947
	0.158	0.0082648	0.052227							20	140	324.24	7.72	254.76	0	1.66277	0.0395897	1.30646	0	8.99685	62.978	331.463		0.010001	2.89971		0.0578511	0.139654	0.142857	0.0589449	1.19646		11.2697	9.41921	0.3676
	0.126	0.0070027	0.055722							20	150	262.48	7.72	243.18	0	1.34605	0.0395897	1.24708	0	8.99685	67.4764	355.139		0.00964889	3.00553		0.0578511	0.144362	0.133333	0.0589449	1.3287		12.0747	9.0876	0.332471
	0.0999	0.0053742	0.053811							40	40	872.36	27.02	389.86	0	4.47364	0.138564	1.99928	0	17.9937	17.9937	94.7037		0.0181287	1.59967		0.115702	0.0723288	1	0.11789	0.188585		3.21993	17.0741	2.75722
	0.0793	0.0043499	0.054878							40	50	779.72	30.88	389.86	0	3.99856	0.158359	1.99928	0	17.9937	22.4921	118.38		0.0164496	1.76296		0.115702	0.0820368	0.8	0.11789	0.259794		4.02491	15.4927	2.00366
	0.063	0.0036607	0.05815							40	60	652.34	27.02	389.86	0	3.34533	0.138564	1.99928	0	17.9937	26.9906	142.056		0.0151474	1.91452		0.115702	0.0906513	0.666667	0.11789	0.338553		4.82989	14.2663	1.54221
	0.05	0.0033538	0.067058							40	70	540.4	23.16	389.86	0	2.77128	0.118769	1.99928	0	17.9937	31.489	165.731		0.0140985	2.05696		0.115702	0.0984362	0.571429	0.11789	0.424365		5.63487	13.2784	1.23527
										40	80	501.8	19.3	389.86	0	2.57333	0.0989744	1.99928	0	17.9937	35.9874	189.407		0.0132297	2.19204		0.115702	0.105566	0.5	0.11789	0.516837		6.43985	12.4601	1.01879
										40	90	478.64	19.3	389.86	0	2.45456	0.0989744	1.99928	0	17.9937	40.4858	213.083		0.0124947	2.32099		0.115702	0.112163	0.444444	0.11789	0.615647		7.24483	11.7678	0.859292
										40	100	440.04	19.3	389.86	0	2.25662	0.0989744	1.99928	0	17.9937	44.9843	236.759		0.0118622	2.44474		0.115702	0.118318	0.4	0.11789	0.720524		8.04981	11.1722	0.737714
	Cross Model Viscosity									40	120	397.58	19.3	389.86	0	2.03887	0.0989744	1.99928	0	17.9937	53.9811	284.111		0.0108238	2.67928		0.115702	0.129552	0.333333	0.11789	0.947578		9.65978	10.1942	0.566262
	\eta=0.056/(1+(0.034*x)^0.63)									40	140	386	15.44	389.86	0	1.97949	0.0791795	1.99928	0	17.9937	62.978	331.463		0.010001	2.89971		0.115702	0.139654	0.285714	0.11789	1.19646		11.2697	9.41921	0.452569
										40	150	343.54	11.58	343.54	0	1.76174	0.0593846	1.76174	0	17.9937	67.4764	355.139		0.00964889	3.00553		0.115702	0.144362	0.266667	0.11789	1.3287		12.0747	9.0876	0.40932
										60	60	625.32	15.44	389.86	0	3.20677	0.0791795	1.99928	0	26.9906	26.9906	142.056		0.0151474	1.91452		0.173553	0.0906513	1	0.176835	0.338553		4.82989	14.2663	1.74169
										60	70	609.88	19.3	389.86	0	3.12759	0.0989744	1.99928	0	26.9906	31.489	165.731		0.0140985	2.05696		0.173553	0.0984362	0.857143	0.176835	0.424365		5.63487	13.2784	1.39505
										60	80	579	19.3	389.86	0	2.96923	0.0989744	1.99928	0	26.9906	35.9874	189.407		0.0132297	2.19204		0.173553	0.105566	0.75	0.176835	0.516837		6.43985	12.4601	1.15057
										60	90	540.4	19.3	389.86	0	2.77128	0.0989744	1.99928	0	26.9906	40.4858	213.083		0.0124947	2.32099		0.173553	0.112163	0.666667	0.176835	0.615647		7.24483	11.7678	0.970439
										60	100	501.8	15.44	389.86	0	2.57333	0.0791795	1.99928	0	26.9906	44.9843	236.759		0.0118622	2.44474		0.173553	0.118318	0.6	0.176835	0.720524		8.04981	11.1722	0.833136
										60	120	455.48	19.3	389.86	0	2.33579	0.0989744	1.99928	0	26.9906	53.9811	284.111		0.0108238	2.67928		0.173553	0.129552	0.5	0.176835	0.947578		9.65978	10.1942	0.639506
										60	140	436.18	15.44	389.86	0	2.23682	0.0791795	1.99928	0	26.9906	62.978	331.463		0.010001	2.89971		0.173553	0.139654	0.428571	0.176835	1.19646		11.2697	9.41921	0.511108
										60	150	409.16	19.3	389.86	0	2.09826	0.0989744	1.99928	0	26.9906	67.4764	355.139		0.00964889	3.00553		0.173553	0.144362	0.4	0.176835	1.3287		12.0747	9.0876	0.462265
										80	80				0	0	0	0	0	35.9874	35.9874	189.407		0.0132297	2.19204		0.231405	0.105566	1	0.23578	0.516837		6.43985	12.4601	1.25428
										80	90				0	0	0	0	0	35.9874	40.4858	213.083		0.0124947	2.32099		0.231405	0.112163	0.888889	0.23578	0.615647		7.24483	11.7678	1.05791
										80	100				0	0	0	0	0	35.9874	44.9843	236.759		0.0118622	2.44474		0.231405	0.118318	0.8	0.23578	0.720524		8.04981	11.1722	0.908233
										80	120	1003.6	69.48	389.86	0	5.14667	0.356308	1.99928	0	35.9874	53.9811	284.111		0.0108238	2.67928		0.231405	0.129552	0.666667	0.23578	0.947578		9.65978	10.1942	0.69715
										80	140	540.4	38.6	389.86	0	2.77128	0.197949	1.99928	0	35.9874	62.978	331.463		0.010001	2.89971		0.231405	0.139654	0.571429	0.23578	1.19646		11.2697	9.41921	0.557178
										80	150	509.52	38.6	389.86	0	2.61292	0.197949	1.99928	0	35.9874	67.4764	355.139		0.00964889	3.00553		0.231405	0.144362	0.533333	0.23578	1.3287		12.0747	9.0876	0.503932
										100	100				0	0	0	0	0	44.9843	44.9843	236.759		0.0118622	2.44474		0.289256	0.118318	1	0.294724	0.720524		8.04981	11.1722	0.971114
										100	120	772	27.02	389.86	0	3.95897	0.138564	1.99928	0	44.9843	53.9811	284.111		0.0108238	2.67928		0.289256	0.129552	0.833333	0.294724	0.947578		9.65978	10.1942	0.745417
										100	140	540.4	30.88	389.86	0	2.77128	0.158359	1.99928	0	44.9843	62.978	331.463		0.010001	2.89971		0.289256	0.139654	0.714286	0.294724	1.19646		11.2697	9.41921	0.595754
										100	150	505.66	34.74	389.86	0	2.59313	0.178154	1.99928	0	44.9843	67.4764	355.139		0.00964889	3.00553		0.289256	0.144362	0.666667	0.294724	1.3287		12.0747	9.0876	0.538822

## Sheet: Span1
	Rheology
	Shear Rate	Shear Stress	Viscosity	Temperature	Torque	Status
								Etching Depth [um]	Width [um]	Qd [ul/min]	Qc [ul/min]	L [um]	L_SD [um]	H [um]	H_SD [um]	L/Width	L/width_SD	H/width	H/width_SD	U_d [mm/s]	U_c [mm/s]	Shear Rate_c [1/s]	Eta_d [Pa*s]	Eta_c [Pa*s]	Alpha=eta_d/eta_c	Interfacial Tension [mN*m]	Ca_d	Ca_c	q=Qd/Qc	Re_d	Re_c	Lambda_s	Wi_c	El_d	Ca_c^(-0.5)*alpha^(-0.6)*Re_c^(-0.2)*q^0.3*Wi^(-0.3)
	[1/s]	[Pa]	[Pa·s]	[°C]	[µN·m]			190	195	5	10	455.616	26.88	389.76	0	2.33649	0.137846	1.99877	0	2.24921	4.49843	23.6759	0.029	0.0299104	0.969562	3.91	0.0166821	0.0344117	0.5	0.0147362	0.0285754	0.034	0.804981	28.1705	9.693
	500	4.1273	0.0082511							5	20	403.2	21.504	389.76	0	2.06769	0.110277	1.99877	0	2.24921	8.99685	47.3518		0.023831	1.2169		0.0166821	0.0548349	0.25	0.0147362	0.07173		1.60996	22.4447	3.67719
	396	3.6928	0.0093211							5	30	322.56	13.44	319.872	0	1.65415	0.0689231	1.64037	0	2.24921	13.4953	71.0278		0.0204176	1.42035		0.0166821	0.0704708	0.166667	0.0147362	0.125583		2.41494	19.2298	2.07231
	315	3.2436	0.010307							5	40	297.024	10.752	297.024	0	1.5232	0.0551385	1.5232	0	2.24921	17.9937	94.7037		0.0181287	1.59967		0.0166821	0.0834278	0.125	0.0147362	0.188585		3.21993	17.0741	1.37576
	250	2.8987	0.011596							5	50	276.864	8.064	276.864	0	1.41982	0.0413538	1.41982	0	2.24921	22.4921	118.38		0.0164496	1.76296		0.0166821	0.0946256	0.1	0.0147362	0.259794		4.02491	15.4927	0.999763
	199	2.5502	0.012844							5	60	260.736	6.72	259.392	0	1.33711	0.0344615	1.33022	0	2.24921	26.9906	142.056		0.0151474	1.91452		0.0166821	0.104562	0.0833333	0.0147362	0.338553		4.82989	14.2663	0.769514
	158	2.2552	0.014299							5	70	248.64	8.064	244.608	0	1.27508	0.0413538	1.2544	0	2.24921	31.489	165.731		0.0140985	2.05696		0.0166821	0.113541	0.0714286	0.0147362	0.424365		5.63487	13.2784	0.616362
	125	1.9869	0.015859							5	80	241.92	4.032	240.576	0	1.24062	0.0206769	1.23372	0	2.24921	35.9874	189.407		0.0132297	2.19204		0.0166821	0.121765	0.0625	0.0147362	0.516837		6.43985	12.4601	0.508347
	99.5	1.7403	0.017488							5	90	235.2	5.376	231.168	0	1.20615	0.0275692	1.18548	0	2.24921	40.4858	213.083		0.0124947	2.32099		0.0166821	0.129375	0.0555556	0.0147362	0.615647		7.24483	11.7678	0.42876
	79	1.5282	0.019333							5	100	228.48	5.376	225.792	0	1.17169	0.0275692	1.15791	0	2.24921	44.9843	236.759		0.0118622	2.44474		0.0166821	0.136474	0.05	0.0147362	0.720524		8.04981	11.1722	0.368096
	62.8	1.3328	0.021225							5	120	215.04	6.72	213.696	0	1.10277	0.0344615	1.09588	0	2.24921	53.9811	284.111		0.0108238	2.67928		0.0166821	0.149433	0.0416667	0.0147362	0.947578		9.65978	10.1942	0.282547
	49.9	1.1589	0.023234							5	140	201.6	5.376	200.256	0	1.03385	0.0275692	1.02695	0	2.24921	62.978	331.463		0.010001	2.89971		0.0166821	0.161085	0.0357143	0.0147362	1.19646		11.2697	9.41921	0.225818
	39.6	1.0052	0.025368							5	150	196.224	6.72	196.224	0	1.00628	0.0344615	1.00628	0	2.24921	67.4764	355.139		0.00964889	3.00553		0.0166821	0.166515	0.0333333	0.0147362	1.3287		12.0747	9.0876	0.204238
	31.5	0.86672	0.027537							10	10	794.304	33.6	389.76	0	4.07335	0.172308	1.99877	0	4.49843	4.49843	23.6759		0.0299104	0.969562		0.0333643	0.0344117	1	0.0294724	0.0285754		0.804981	28.1705	11.9335
	25	0.74364	0.029743							10	20	483.84	13.44	389.76	0	2.48123	0.0689231	1.99877	0	4.49843	8.99685	47.3518		0.023831	1.2169		0.0333643	0.0548349	0.5	0.0294724	0.07173		1.60996	22.4447	4.52715
	19.9	0.63425	0.031934							10	30	376.32	9.408	379.008	0	1.92985	0.0482462	1.94363	0	4.49843	13.4953	71.0278		0.0204176	1.42035		0.0333643	0.0704708	0.333333	0.0294724	0.125583		2.41494	19.2298	2.55132
	15.8	0.53893	0.034159							10	40	362.88	10.752	360.192	0	1.86092	0.0551385	1.84714	0	4.49843	17.9937	94.7037		0.0181287	1.59967		0.0333643	0.0834278	0.25	0.0294724	0.188585		3.21993	17.0741	1.69376
	12.5	0.45505	0.036308							10	50	338.688	10.752	334.656	0	1.73686	0.0551385	1.71618	0	4.49843	22.4921	118.38		0.0164496	1.76296		0.0333643	0.0946256	0.2	0.0294724	0.259794		4.02491	15.4927	1.23085
	9.96	0.38186	0.038356							10	60	315.84	9.408	309.12	0	1.61969	0.0482462	1.58523	0	4.49843	26.9906	142.056		0.0151474	1.91452		0.0333643	0.104562	0.166667	0.0294724	0.338553		4.82989	14.2663	0.947383
	7.91	0.31919	0.04036							10	70	292.992	6.72	288.96	0	1.50252	0.0344615	1.48185	0	4.49843	31.489	165.731		0.0140985	2.05696		0.0333643	0.113541	0.142857	0.0294724	0.424365		5.63487	13.2784	0.758831
	6.28	0.26427	0.042066							10	80	279.552	8.064	278.208	0	1.4336	0.0413538	1.42671	0	4.49843	35.9874	189.407		0.0132297	2.19204		0.0333643	0.121765	0.125	0.0294724	0.516837		6.43985	12.4601	0.625848
	4.99	0.21764	0.043613							10	90	260.736	6.72	255.36	0	1.33711	0.0344615	1.30954	0	4.49843	40.4858	213.083		0.0124947	2.32099		0.0333643	0.129375	0.111111	0.0294724	0.615647		7.24483	11.7678	0.527865
	3.96	0.17928	0.045225							10	100	272.832	8.064	264.768	0	1.39914	0.0413538	1.35778	0	4.49843	44.9843	236.759		0.0118622	2.44474		0.0333643	0.136474	0.1	0.0294724	0.720524		8.04981	11.1722	0.45318
	3.15	0.1465	0.046493							10	120	255.36	6.72	247.296	0	1.30954	0.0344615	1.26818	0	4.49843	53.9811	284.111		0.0108238	2.67928		0.0333643	0.149433	0.0833333	0.0294724	0.947578		9.65978	10.1942	0.347856
	2.5	0.11957	0.047758							10	140	240.576	6.72	229.824	0	1.23372	0.0344615	1.17858	0	4.49843	62.978	331.463		0.010001	2.89971		0.0333643	0.161085	0.0714286	0.0294724	1.19646		11.2697	9.41921	0.278014
	1.99	0.096341	0.048488							10	150	217.728	6.72	211.008	0	1.11655	0.0344615	1.08209	0	4.49843	67.4764	355.139		0.00964889	3.00553		0.0333643	0.166515	0.0666667	0.0294724	1.3287		12.0747	9.0876	0.251446
	1.58	0.078282	0.049568							20	20	733.4	23.16	389.86	0	3.76103	0.118769	1.99928	0	8.99685	8.99685	47.3518		0.023831	1.2169		0.0667286	0.0548349	1	0.0589449	0.07173		1.60996	22.4447	5.57357
	1.25	0.063052	0.05026							20	30	551.98	19.3	389.86	0	2.83067	0.0989744	1.99928	0	8.99685	13.4953	71.0278		0.0204176	1.42035		0.0667286	0.0704708	0.666667	0.0589449	0.125583		2.41494	19.2298	3.14104
	0.996	0.050336	0.050544							20	40	505.66	23.16	389.86	0	2.59313	0.118769	1.99928	0	8.99685	17.9937	94.7037		0.0181287	1.59967		0.0667286	0.0834278	0.5	0.0589449	0.188585		3.21993	17.0741	2.08527
	0.792	0.040376	0.050958							20	50	440.04	19.3	389.86	0	2.25662	0.0989744	1.99928	0	8.99685	22.4921	118.38		0.0164496	1.76296		0.0667286	0.0946256	0.4	0.0589449	0.259794		4.02491	15.4927	1.51536
	0.629	0.032156	0.051132							20	60	424.6	15.44	389.86	0	2.17744	0.0791795	1.99928	0	8.99685	26.9906	142.056		0.0151474	1.91452		0.0667286	0.104562	0.333333	0.0589449	0.338553		4.82989	14.2663	1.16637
	0.499	0.025225	0.050504							20	70	409.16	11.58	389.86	0	2.09826	0.0593846	1.99928	0	8.99685	31.489	165.731		0.0140985	2.05696		0.0667286	0.113541	0.285714	0.0589449	0.424365		5.63487	13.2784	0.934231
	0.397	0.020605	0.051909							20	80	378.28	15.44	362.84	0	1.9399	0.0791795	1.86072	0	8.99685	35.9874	189.407		0.0132297	2.19204		0.0667286	0.121765	0.25	0.0589449	0.516837		6.43985	12.4601	0.770509
	0.316	0.016318	0.051671							20	90	362.84	19.3	343.54	0	1.86072	0.0989744	1.76174	0	8.99685	40.4858	213.083		0.0124947	2.32099		0.0667286	0.129375	0.222222	0.0589449	0.615647		7.24483	11.7678	0.649878
	0.251	0.012709	0.050663							20	100	374.42	15.44	347.4	0	1.9201	0.0791795	1.78154	0	8.99685	44.9843	236.759		0.0118622	2.44474		0.0667286	0.136474	0.2	0.0589449	0.720524		8.04981	11.1722	0.55793
	0.199	0.010452	0.05241							20	120	331.96	19.3	297.22	0	1.70236	0.0989744	1.52421	0	8.99685	53.9811	284.111		0.0108238	2.67928		0.0667286	0.149433	0.166667	0.0589449	0.947578		9.65978	10.1942	0.428261
	0.158	0.0082648	0.052227							20	140	308.8	15.44	270.2	0	1.58359	0.0791795	1.38564	0	8.99685	62.978	331.463		0.010001	2.89971		0.0667286	0.161085	0.142857	0.0589449	1.19646		11.2697	9.41921	0.342276
	0.126	0.0070027	0.055722							20	150	301.08	19.3	266.34	0	1.544	0.0989744	1.36585	0	8.99685	67.4764	355.139		0.00964889	3.00553		0.0667286	0.166515	0.133333	0.0589449	1.3287		12.0747	9.0876	0.309567
	0.0999	0.0053742	0.053811							40	40	633.04	34.74	389.86	0	3.24636	0.178154	1.99928	0	17.9937	17.9937	94.7037		0.0181287	1.59967		0.133457	0.0834278	1	0.11789	0.188585		3.21993	17.0741	2.56727
	0.0793	0.0043499	0.054878							40	50	609.88	30.88	389.86	0	3.12759	0.158359	1.99928	0	17.9937	22.4921	118.38		0.0164496	1.76296		0.133457	0.0946256	0.8	0.11789	0.259794		4.02491	15.4927	1.86562
	0.063	0.0036607	0.05815							40	60	582.86	23.16	389.86	0	2.98903	0.118769	1.99928	0	17.9937	26.9906	142.056		0.0151474	1.91452		0.133457	0.104562	0.666667	0.11789	0.338553		4.82989	14.2663	1.43596
	0.05	0.0033538	0.067058							40	70	536.54	27.02	389.86	0	2.75149	0.138564	1.99928	0	17.9937	31.489	165.731		0.0140985	2.05696		0.133457	0.113541	0.571429	0.11789	0.424365		5.63487	13.2784	1.15017
										40	80	501.8	19.3	389.86	0	2.57333	0.0989744	1.99928	0	17.9937	35.9874	189.407		0.0132297	2.19204		0.133457	0.121765	0.5	0.11789	0.516837		6.43985	12.4601	0.948608
										40	90	474.78	15.44	389.86	0	2.43477	0.0791795	1.99928	0	17.9937	40.4858	213.083		0.0124947	2.32099		0.133457	0.129375	0.444444	0.11789	0.615647		7.24483	11.7678	0.800094
										40	100	455.48	19.3	389.86	0	2.33579	0.0989744	1.99928	0	17.9937	44.9843	236.759		0.0118622	2.44474		0.133457	0.136474	0.4	0.11789	0.720524		8.04981	11.1722	0.686892
	Cross Model Viscosity									40	120	401.44	15.44	389.86	0	2.05867	0.0791795	1.99928	0	17.9937	53.9811	284.111		0.0108238	2.67928		0.133457	0.149433	0.333333	0.11789	0.947578		9.65978	10.1942	0.527251
	\eta=0.056/(1+(0.034*x)^0.63)									40	140	382.14	15.44	386	0	1.95969	0.0791795	1.97949	0	17.9937	62.978	331.463		0.010001	2.89971		0.133457	0.161085	0.285714	0.11789	1.19646		11.2697	9.41921	0.421391
										40	150	362.84	15.44	366.7	0	1.86072	0.0791795	1.88051	0	17.9937	67.4764	355.139		0.00964889	3.00553		0.133457	0.166515	0.266667	0.11789	1.3287		12.0747	9.0876	0.381121
										60	60				0	0	0	0	0	26.9906	26.9906	142.056		0.0151474	1.91452		0.200186	0.104562	1	0.176835	0.338553		4.82989	14.2663	1.6217
										60	70	764.28	30.88	389.86	0	3.91938	0.158359	1.99928	0	26.9906	31.489	165.731		0.0140985	2.05696		0.200186	0.113541	0.857143	0.176835	0.424365		5.63487	13.2784	1.29894
										60	80	694.8	34.74	389.86	0	3.56308	0.178154	1.99928	0	26.9906	35.9874	189.407		0.0132297	2.19204		0.200186	0.121765	0.75	0.176835	0.516837		6.43985	12.4601	1.07131
										60	90	617.6	23.16	389.86	0	3.16718	0.118769	1.99928	0	26.9906	40.4858	213.083		0.0124947	2.32099		0.200186	0.129375	0.666667	0.176835	0.615647		7.24483	11.7678	0.903583
										60	100	509.52	27.02	389.86	0	2.61292	0.138564	1.99928	0	26.9906	44.9843	236.759		0.0118622	2.44474		0.200186	0.136474	0.6	0.176835	0.720524		8.04981	11.1722	0.775739
										60	120	443.9	23.16	389.86	0	2.27641	0.118769	1.99928	0	26.9906	53.9811	284.111		0.0108238	2.67928		0.200186	0.149433	0.5	0.176835	0.947578		9.65978	10.1942	0.595449
										60	140	416.88	23.16	389.86	0	2.13785	0.118769	1.99928	0	26.9906	62.978	331.463		0.010001	2.89971		0.200186	0.161085	0.428571	0.176835	1.19646		11.2697	9.41921	0.475896
										60	150	362.84	19.3	386	0	1.86072	0.0989744	1.97949	0	26.9906	67.4764	355.139		0.00964889	3.00553		0.200186	0.166515	0.4	0.176835	1.3287		12.0747	9.0876	0.430418
										80	80				0	0	0	0	0	35.9874	35.9874	189.407		0.0132297	2.19204		0.266914	0.121765	1	0.23578	0.516837		6.43985	12.4601	1.16787
										80	90				0	0	0	0	0	35.9874	40.4858	213.083		0.0124947	2.32099		0.266914	0.129375	0.888889	0.23578	0.615647		7.24483	11.7678	0.985031
										80	100				0	0	0	0	0	35.9874	44.9843	236.759		0.0118622	2.44474		0.266914	0.136474	0.8	0.23578	0.720524		8.04981	11.1722	0.845663
										80	120	617.6	38.6	389.86	0	3.16718	0.197949	1.99928	0	35.9874	53.9811	284.111		0.0108238	2.67928		0.266914	0.149433	0.666667	0.23578	0.947578		9.65978	10.1942	0.649122
										80	140	482.5	38.6	389.86	0	2.47436	0.197949	1.99928	0	35.9874	62.978	331.463		0.010001	2.89971		0.266914	0.161085	0.571429	0.23578	1.19646		11.2697	9.41921	0.518793
										80	150				0	0	0	0	0	35.9874	67.4764	355.139		0.00964889	3.00553		0.266914	0.166515	0.533333	0.23578	1.3287		12.0747	9.0876	0.469215
										100	100				0	0	0	0	0	44.9843	44.9843	236.759		0.0118622	2.44474		0.333643	0.136474	1	0.294724	0.720524		8.04981	11.1722	0.904212
										100	120				0	0	0	0	0	44.9843	53.9811	284.111		0.0108238	2.67928		0.333643	0.149433	0.833333	0.294724	0.947578		9.65978	10.1942	0.694063
										100	140				0	0	0	0	0	44.9843	62.978	331.463		0.010001	2.89971		0.333643	0.161085	0.714286	0.294724	1.19646		11.2697	9.41921	0.554711
										100	150				0	0	0	0	0	44.9843	67.4764	355.139		0.00964889	3.00553		0.333643	0.166515	0.666667	0.294724	1.3287		12.0747	9.0876	0.501701

## Sheet: Tween 0pt03
	Rheology
	Shear Rate	Shear Stress	Viscosity	Temperature	Torque	Status
								Etching Depth [um]	Width [um]	Qd [ul/min]	Qc [ul/min]	L [um]	L_SD [um]	H [um]	H_SD [um]	L/Width	L/width_SD	H/width	H/width_SD	U_d [mm/s]	U_c [mm/s]	Shear Rate_c [1/s]	Eta_d [Pa*s]	Eta_c [Pa*s]	Alpha=eta_d/eta_c	Interfacial Tension [mN*m]	Ca_d	Ca_c	q=Qd/Qc	Re_d	Re_c	Lambda_s	Wi_c	El_d	Ca_c^(-0.5)*alpha^(-0.6)*Re_c^(-0.2)*q^0.3*Wi^(-0.3)
	[1/s]	[Pa]	[Pa·s]	[°C]	[µN·m]			190	195	5	10	376.32	13.44	383.04	0	1.92985	0.0689231	1.96431	0	2.24921	4.49843	23.6759	0.029	0.0299104	0.969562	6.94	0.00939873	0.0193876	0.5	0.0147362	0.0285754	0.034	0.804981	28.1705	12.9137
	500	4.1273	0.0082511							5	20	284.928	10.752	282.24	0	1.46117	0.0551385	1.44738	0	2.24921	8.99685	47.3518		0.023831	1.2169		0.00939873	0.030894	0.25	0.0147362	0.07173		1.60996	22.4447	4.899
	396	3.6928	0.0093211							5	30	260.736	9.408	258.048	0	1.33711	0.0482462	1.32332	0	2.24921	13.4953	71.0278		0.0204176	1.42035		0.00939873	0.0397033	0.166667	0.0147362	0.125583		2.41494	19.2298	2.76087
	315	3.2436	0.010307							5	40	248.64	9.408	247.296	0	1.27508	0.0482462	1.26818	0	2.24921	17.9937	94.7037		0.0181287	1.59967		0.00939873	0.0470033	0.125	0.0147362	0.188585		3.21993	17.0741	1.83289
	250	2.8987	0.011596							5	50	236.544	6.72	235.2	0	1.21305	0.0344615	1.20615	0	2.24921	22.4921	118.38		0.0164496	1.76296		0.00939873	0.0533121	0.1	0.0147362	0.259794		4.02491	15.4927	1.33195
	199	2.5502	0.012844							5	60	232.512	4.032	231.168	0	1.19237	0.0206769	1.18548	0	2.24921	26.9906	142.056		0.0151474	1.91452		0.00939873	0.0589103	0.0833333	0.0147362	0.338553		4.82989	14.2663	1.0252
	158	2.2552	0.014299							5	70	221.76	6.72	221.76	0	1.13723	0.0344615	1.13723	0	2.24921	31.489	165.731		0.0140985	2.05696		0.00939873	0.0639693	0.0714286	0.0147362	0.424365		5.63487	13.2784	0.821159
	125	1.9869	0.015859							5	80	216.384	4.032	216.384	0	1.10966	0.0206769	1.10966	0	2.24921	35.9874	189.407		0.0132297	2.19204		0.00939873	0.0686027	0.0625	0.0147362	0.516837		6.43985	12.4601	0.677253
	99.5	1.7403	0.017488							5	90	204.288	5.376	204.288	0	1.04763	0.0275692	1.04763	0	2.24921	40.4858	213.083		0.0124947	2.32099		0.00939873	0.07289	0.0555556	0.0147362	0.615647		7.24483	11.7678	0.571222
	79	1.5282	0.019333							5	100	190.848	5.376	189.504	0	0.978708	0.0275692	0.971815	0	2.24921	44.9843	236.759		0.0118622	2.44474		0.00939873	0.0768894	0.05	0.0147362	0.720524		8.04981	11.1722	0.490403
	62.8	1.3328	0.021225							5	120	182.784	4.032	182.784	0	0.937354	0.0206769	0.937354	0	2.24921	53.9811	284.111		0.0108238	2.67928		0.00939873	0.0841904	0.0416667	0.0147362	0.947578		9.65978	10.1942	0.376428
	49.9	1.1589	0.023234							5	140	169.344	4.032	168	0	0.868431	0.0206769	0.861538	0	2.24921	62.978	331.463		0.010001	2.89971		0.00939873	0.0907553	0.0357143	0.0147362	1.19646		11.2697	9.41921	0.30085
	39.6	1.0052	0.025368							5	150	163.968	4.032	161.28	0	0.840862	0.0206769	0.827077	0	2.24921	67.4764	355.139		0.00964889	3.00553		0.00939873	0.0938145	0.0333333	0.0147362	1.3287		12.0747	9.0876	0.272099
	31.5	0.86672	0.027537							10	10	689.472	38.976	389.76	0	3.53575	0.199877	1.99877	0	4.49843	4.49843	23.6759		0.0299104	0.969562		0.0187975	0.0193876	1	0.0294724	0.0285754		0.804981	28.1705	15.8986
	25	0.74364	0.029743							10	20	502.656	16.128	389.76	0	2.57772	0.0827077	1.99877	0	4.49843	8.99685	47.3518		0.023831	1.2169		0.0187975	0.030894	0.5	0.0294724	0.07173		1.60996	22.4447	6.03137
	19.9	0.63425	0.031934							10	30	392.448	13.44	389.76	0	2.01255	0.0689231	1.99877	0	4.49843	13.4953	71.0278		0.0204176	1.42035		0.0187975	0.0397033	0.333333	0.0294724	0.125583		2.41494	19.2298	3.39904
	15.8	0.53893	0.034159							10	40	322.56	12.096	318.528	0	1.65415	0.0620308	1.63348	0	4.49843	17.9937	94.7037		0.0181287	1.59967		0.0187975	0.0470033	0.25	0.0294724	0.188585		3.21993	17.0741	2.25655
	12.5	0.45505	0.036308							10	50	299.712	10.752	295.68	0	1.53698	0.0551385	1.51631	0	4.49843	22.4921	118.38		0.0164496	1.76296		0.0187975	0.0533121	0.2	0.0294724	0.259794		4.02491	15.4927	1.63983
	9.96	0.38186	0.038356							10	60	287.616	8.064	286.272	0	1.47495	0.0413538	1.46806	0	4.49843	26.9906	142.056		0.0151474	1.91452		0.0187975	0.0589103	0.166667	0.0294724	0.338553		4.82989	14.2663	1.26217
	7.91	0.31919	0.04036							10	70	248.64	6.72	245.952	0	1.27508	0.0344615	1.26129	0	4.49843	31.489	165.731		0.0140985	2.05696		0.0187975	0.0639693	0.142857	0.0294724	0.424365		5.63487	13.2784	1.01097
	6.28	0.26427	0.042066							10	80	240.576	5.376	241.92	0	1.23372	0.0275692	1.24062	0	4.49843	35.9874	189.407		0.0132297	2.19204		0.0187975	0.0686027	0.125	0.0294724	0.516837		6.43985	12.4601	0.833797
	4.99	0.21764	0.043613							10	90	223.104	6.72	221.76	0	1.14412	0.0344615	1.13723	0	4.49843	40.4858	213.083		0.0124947	2.32099		0.0187975	0.07289	0.111111	0.0294724	0.615647		7.24483	11.7678	0.703257
	3.96	0.17928	0.045225							10	100	209.664	5.376	209.664	0	1.0752	0.0275692	1.0752	0	4.49843	44.9843	236.759		0.0118622	2.44474		0.0187975	0.0768894	0.1	0.0294724	0.720524		8.04981	11.1722	0.603756
	3.15	0.1465	0.046493							10	120	205.632	5.376	204.288	0	1.05452	0.0275692	1.04763	0	4.49843	53.9811	284.111		0.0108238	2.67928		0.0187975	0.0841904	0.0833333	0.0294724	0.947578		9.65978	10.1942	0.463437
	2.5	0.11957	0.047758							10	140	190.848	4.032	188.16	0	0.978708	0.0206769	0.964923	0	4.49843	62.978	331.463		0.010001	2.89971		0.0187975	0.0907553	0.0714286	0.0294724	1.19646		11.2697	9.41921	0.370389
	1.99	0.096341	0.048488							10	150	174.72	5.376	174.72	0	0.896	0.0275692	0.896	0	4.49843	67.4764	355.139		0.00964889	3.00553		0.0187975	0.0938145	0.0666667	0.0294724	1.3287		12.0747	9.0876	0.334994
	1.58	0.078282	0.049568							20	20				0	0	0	0	0	8.99685	8.99685	47.3518		0.023831	1.2169		0.0375949	0.030894	1	0.0589449	0.07173		1.60996	22.4447	7.42549
	1.25	0.063052	0.05026							20	30				0	0	0	0	0	8.99685	13.4953	71.0278		0.0204176	1.42035		0.0375949	0.0397033	0.666667	0.0589449	0.125583		2.41494	19.2298	4.1847
	0.996	0.050336	0.050544							20	40				0	0	0	0	0	8.99685	17.9937	94.7037		0.0181287	1.59967		0.0375949	0.0470033	0.5	0.0589449	0.188585		3.21993	17.0741	2.77813
	0.792	0.040376	0.050958							20	50	559.7	38.6	389.86	0	2.87026	0.197949	1.99928	0	8.99685	22.4921	118.38		0.0164496	1.76296		0.0375949	0.0533121	0.4	0.0589449	0.259794		4.02491	15.4927	2.01886
	0.629	0.032156	0.051132							20	60	505.66	19.3	389.86	0	2.59313	0.0989744	1.99928	0	8.99685	26.9906	142.056		0.0151474	1.91452		0.0375949	0.0589103	0.333333	0.0589449	0.338553		4.82989	14.2663	1.55391
	0.499	0.025225	0.050504							20	70	443.9	23.16	389.86	0	2.27641	0.118769	1.99928	0	8.99685	31.489	165.731		0.0140985	2.05696		0.0375949	0.0639693	0.285714	0.0589449	0.424365		5.63487	13.2784	1.24464
	0.397	0.020605	0.051909							20	80	409.16	19.3	389.86	0	2.09826	0.0989744	1.99928	0	8.99685	35.9874	189.407		0.0132297	2.19204		0.0375949	0.0686027	0.25	0.0589449	0.516837		6.43985	12.4601	1.02652
	0.316	0.016318	0.051671							20	90	386	15.44	389.86	0	1.97949	0.0791795	1.99928	0	8.99685	40.4858	213.083		0.0124947	2.32099		0.0375949	0.07289	0.222222	0.0589449	0.615647		7.24483	11.7678	0.865811
	0.251	0.012709	0.050663							20	100	331.96	15.44	308.8	0	1.70236	0.0791795	1.58359	0	8.99685	44.9843	236.759		0.0118622	2.44474		0.0375949	0.0768894	0.2	0.0589449	0.720524		8.04981	11.1722	0.743311
	0.199	0.010452	0.05241							20	120	320.38	15.44	301.08	0	1.64297	0.0791795	1.544	0	8.99685	53.9811	284.111		0.0108238	2.67928		0.0375949	0.0841904	0.166667	0.0589449	0.947578		9.65978	10.1942	0.570558
	0.158	0.0082648	0.052227							20	140	312.66	11.58	289.5	0	1.60338	0.0593846	1.48462	0	8.99685	62.978	331.463		0.010001	2.89971		0.0375949	0.0907553	0.142857	0.0589449	1.19646		11.2697	9.41921	0.456003
	0.126	0.0070027	0.055722							20	150	304.94	11.58	277.92	0	1.56379	0.0593846	1.42523	0	8.99685	67.4764	355.139		0.00964889	3.00553		0.0375949	0.0938145	0.133333	0.0589449	1.3287		12.0747	9.0876	0.412426
	0.0999	0.0053742	0.053811							40	40				0	0	0	0	0	17.9937	17.9937	94.7037		0.0181287	1.59967		0.0751898	0.0470033	1	0.11789	0.188585		3.21993	17.0741	3.42028
	0.0793	0.0043499	0.054878							40	50				0	0	0	0	0	17.9937	22.4921	118.38		0.0164496	1.76296		0.0751898	0.0533121	0.8	0.11789	0.259794		4.02491	15.4927	2.48551
	0.063	0.0036607	0.05815							40	60				0	0	0	0	0	17.9937	26.9906	142.056		0.0151474	1.91452		0.0751898	0.0589103	0.666667	0.11789	0.338553		4.82989	14.2663	1.91309
	0.05	0.0033538	0.067058							40	70				0	0	0	0	0	17.9937	31.489	165.731		0.0140985	2.05696		0.0751898	0.0639693	0.571429	0.11789	0.424365		5.63487	13.2784	1.53234
										40	80	598.3	27.02	389.86	0	3.06821	0.138564	1.99928	0	17.9937	35.9874	189.407		0.0132297	2.19204		0.0751898	0.0686027	0.5	0.11789	0.516837		6.43985	12.4601	1.2638
										40	90	528.82	19.3	389.86	0	2.7119	0.0989744	1.99928	0	17.9937	40.4858	213.083		0.0124947	2.32099		0.0751898	0.07289	0.444444	0.11789	0.615647		7.24483	11.7678	1.06594
										40	100	463.2	19.3	389.86	0	2.37538	0.0989744	1.99928	0	17.9937	44.9843	236.759		0.0118622	2.44474		0.0751898	0.0768894	0.4	0.11789	0.720524		8.04981	11.1722	0.915124
	Cross Model Viscosity									40	120	440.04	19.3	389.86	0	2.25662	0.0989744	1.99928	0	17.9937	53.9811	284.111		0.0108238	2.67928		0.0751898	0.0841904	0.333333	0.11789	0.947578		9.65978	10.1942	0.702439
	\eta=0.056/(1+(0.034*x)^0.63)									40	140	397.58	15.44	389.86	0	2.03887	0.0791795	1.99928	0	17.9937	62.978	331.463		0.010001	2.89971		0.0751898	0.0907553	0.285714	0.11789	1.19646		11.2697	9.41921	0.561405
										40	150	389.86	11.58	389.86	0	1.99928	0.0593846	1.99928	0	17.9937	67.4764	355.139		0.00964889	3.00553		0.0751898	0.0938145	0.266667	0.11789	1.3287		12.0747	9.0876	0.507756
										60	60				0	0	0	0	0	26.9906	26.9906	142.056		0.0151474	1.91452		0.112785	0.0589103	1	0.176835	0.338553		4.82989	14.2663	2.16054
										60	70	772	30.88	389.86	0	3.95897	0.158359	1.99928	0	26.9906	31.489	165.731		0.0140985	2.05696		0.112785	0.0639693	0.857143	0.176835	0.424365		5.63487	13.2784	1.73054
										60	80	721.82	19.3	389.86	0	3.70164	0.0989744	1.99928	0	26.9906	35.9874	189.407		0.0132297	2.19204		0.112785	0.0686027	0.75	0.176835	0.516837		6.43985	12.4601	1.42727
										60	90	656.2	23.16	389.86	0	3.36513	0.118769	1.99928	0	26.9906	40.4858	213.083		0.0124947	2.32099		0.112785	0.07289	0.666667	0.176835	0.615647		7.24483	11.7678	1.20381
										60	100	617.6	19.3	389.86	0	3.16718	0.0989744	1.99928	0	26.9906	44.9843	236.759		0.0118622	2.44474		0.112785	0.0768894	0.6	0.176835	0.720524		8.04981	11.1722	1.03349
										60	120	575.14	23.16	389.86	0	2.94944	0.118769	1.99928	0	26.9906	53.9811	284.111		0.0108238	2.67928		0.112785	0.0841904	0.5	0.176835	0.947578		9.65978	10.1942	0.793297
										60	140	548.12	19.3	389.86	0	2.81087	0.0989744	1.99928	0	26.9906	62.978	331.463		0.010001	2.89971		0.112785	0.0907553	0.428571	0.176835	1.19646		11.2697	9.41921	0.634021
										60	150	517.24	15.44	389.86	0	2.65251	0.0791795	1.99928	0	26.9906	67.4764	355.139		0.00964889	3.00553		0.112785	0.0938145	0.4	0.176835	1.3287		12.0747	9.0876	0.573432
										80	80	772	23.16	389.86	0	3.95897	0.118769	1.99928	0	35.9874	35.9874	189.407		0.0132297	2.19204		0.15038	0.0686027	1	0.23578	0.516837		6.43985	12.4601	1.55592
										80	90	733.4	23.16	389.86	0	3.76103	0.118769	1.99928	0	35.9874	40.4858	213.083		0.0124947	2.32099		0.15038	0.07289	0.888889	0.23578	0.615647		7.24483	11.7678	1.31232
										80	100	690.94	19.3	389.86	0	3.54328	0.0989744	1.99928	0	35.9874	44.9843	236.759		0.0118622	2.44474		0.15038	0.0768894	0.8	0.23578	0.720524		8.04981	11.1722	1.12665
										80	120	606.02	19.3	389.86	0	3.10779	0.0989744	1.99928	0	35.9874	53.9811	284.111		0.0108238	2.67928		0.15038	0.0841904	0.666667	0.23578	0.947578		9.65978	10.1942	0.864804
										80	140	559.7	15.44	389.86	0	2.87026	0.0791795	1.99928	0	35.9874	62.978	331.463		0.010001	2.89971		0.15038	0.0907553	0.571429	0.23578	1.19646		11.2697	9.41921	0.691171
										80	150	540.4	19.3	389.86	0	2.77128	0.0989744	1.99928	0	35.9874	67.4764	355.139		0.00964889	3.00553		0.15038	0.0938145	0.533333	0.23578	1.3287		12.0747	9.0876	0.62512
										100	100				0	0	0	0	0	44.9843	44.9843	236.759		0.0118622	2.44474		0.187975	0.0768894	1	0.294724	0.720524		8.04981	11.1722	1.20465
										100	120	733.4	23.16	389.86	0	3.76103	0.118769	1.99928	0	44.9843	53.9811	284.111		0.0108238	2.67928		0.187975	0.0841904	0.833333	0.294724	0.947578		9.65978	10.1942	0.924678
										100	140	656.2	19.3	389.86	0	3.36513	0.0989744	1.99928	0	44.9843	62.978	331.463		0.010001	2.89971		0.187975	0.0907553	0.714286	0.294724	1.19646		11.2697	9.41921	0.739024
										100	150	544.26	30.88	389.86	0	2.79108	0.158359	1.99928	0	44.9843	67.4764	355.139		0.00964889	3.00553		0.187975	0.0938145	0.666667	0.294724	1.3287		12.0747	9.0876	0.6684

## Sheet: Tween 0pt3
	Rheology
	Shear Rate	Shear Stress	Viscosity	Temperature	Torque	Status
								Etching Depth [um]	Width [um]	Qd [ul/min]	Qc [ul/min]	L [um]	L_SD [um]	H [um]	H_SD [um]	L/Width	L/width_SD	H/width	H/width_SD	U_d [mm/s]	U_c [mm/s]	Shear Rate_c [1/s]	Eta_d [Pa*s]	Eta_c [Pa*s]	Alpha=eta_d/eta_c	Interfacial Tension [mN*m]	Ca_d	Ca_c	q=Qd/Qc	Re_d	Re_c	Lambda_s	Wi_c	El_d	Ca_c^(-0.5)*alpha^(-0.6)*Re_c^(-0.2)*q^0.3*Wi^(-0.3)
	[1/s]	[Pa]	[Pa·s]	[°C]	[µN·m]			190	195	5	10	379.008	18.816	389.76	0	1.94363	0.0964923	1.99877	0	2.24921	4.49843	23.6759	0.029	0.0299104	0.969562	2.49	0.0261957	0.054036	0.5	0.0147362	0.0285754	0.034	0.804981	28.1705	7.73517
	500	4.1273	0.0082511							5	20	336	13.44	333.312	0	1.72308	0.0689231	1.70929	0	2.24921	8.99685	47.3518		0.023831	1.2169		0.0261957	0.0861062	0.25	0.0147362	0.07173		1.60996	22.4447	2.93445
	396	3.6928	0.0093211							5	30	292.992	13.44	279.552	0	1.50252	0.0689231	1.4336	0	2.24921	13.4953	71.0278		0.0204176	1.42035		0.0261957	0.110659	0.166667	0.0147362	0.125583		2.41494	19.2298	1.65374
	315	3.2436	0.010307							5	40	260.736	12.096	255.36	0	1.33711	0.0620308	1.30954	0	2.24921	17.9937	94.7037		0.0181287	1.59967		0.0261957	0.131005	0.125	0.0147362	0.188585		3.21993	17.0741	1.09788
	250	2.8987	0.011596							5	50	243.264	10.752	241.92	0	1.24751	0.0551385	1.24062	0	2.24921	22.4921	118.38		0.0164496	1.76296		0.0261957	0.148589	0.1	0.0147362	0.259794		4.02491	15.4927	0.797827
	199	2.5502	0.012844							5	60	225.792	6.72	217.728	0	1.15791	0.0344615	1.11655	0	2.24921	26.9906	142.056		0.0151474	1.91452		0.0261957	0.164192	0.0833333	0.0147362	0.338553		4.82989	14.2663	0.614084
	158	2.2552	0.014299							5	70	209.664	6.72	208.32	0	1.0752	0.0344615	1.06831	0	2.24921	31.489	165.731		0.0140985	2.05696		0.0261957	0.178292	0.0714286	0.0147362	0.424365		5.63487	13.2784	0.491867
	125	1.9869	0.015859							5	80	194.88	5.376	194.88	0	0.999385	0.0275692	0.999385	0	2.24921	35.9874	189.407		0.0132297	2.19204		0.0261957	0.191206	0.0625	0.0147362	0.516837		6.43985	12.4601	0.405668
	99.5	1.7403	0.017488							5	90	186.816	5.376	185.472	0	0.958031	0.0275692	0.951138	0	2.24921	40.4858	213.083		0.0124947	2.32099		0.0261957	0.203155	0.0555556	0.0147362	0.615647		7.24483	11.7678	0.342157
	79	1.5282	0.019333							5	100	181.44	5.376	181.44	0	0.930462	0.0275692	0.930462	0	2.24921	44.9843	236.759		0.0118622	2.44474		0.0261957	0.214302	0.05	0.0147362	0.720524		8.04981	11.1722	0.293746
	62.8	1.3328	0.021225							5	120	174.72	4.032	174.72	0	0.896	0.0206769	0.896	0	2.24921	53.9811	284.111		0.0108238	2.67928		0.0261957	0.234651	0.0416667	0.0147362	0.947578		9.65978	10.1942	0.225477
	49.9	1.1589	0.023234							5	140	166.656	5.376	166.656	0	0.854646	0.0275692	0.854646	0	2.24921	62.978	331.463		0.010001	2.89971		0.0261957	0.252948	0.0357143	0.0147362	1.19646		11.2697	9.41921	0.180206
	39.6	1.0052	0.025368							5	150	158.592	5.376	158.592	0	0.813292	0.0275692	0.813292	0	2.24921	67.4764	355.139		0.00964889	3.00553		0.0261957	0.261475	0.0333333	0.0147362	1.3287		12.0747	9.0876	0.162985
	31.5	0.86672	0.027537							10	10	619.584	16.128	389.76	0	3.17735	0.0827077	1.99877	0	4.49843	4.49843	23.6759		0.0299104	0.969562		0.0523913	0.054036	1	0.0294724	0.0285754		0.804981	28.1705	9.52311
	25	0.74364	0.029743							10	20	385.728	13.44	389.76	0	1.97809	0.0689231	1.99877	0	4.49843	8.99685	47.3518		0.023831	1.2169		0.0523913	0.0861062	0.5	0.0294724	0.07173		1.60996	22.4447	3.61273
	19.9	0.63425	0.031934							10	30	340.032	13.44	336	0	1.74375	0.0689231	1.72308	0	4.49843	13.4953	71.0278		0.0204176	1.42035		0.0523913	0.110659	0.333333	0.0294724	0.125583		2.41494	19.2298	2.03599
	15.8	0.53893	0.034159							10	40	307.776	12.096	303.744	0	1.57834	0.0620308	1.55766	0	4.49843	17.9937	94.7037		0.0181287	1.59967		0.0523913	0.131005	0.25	0.0294724	0.188585		3.21993	17.0741	1.35165
	12.5	0.45505	0.036308							10	50	280.896	8.064	280.896	0	1.44049	0.0413538	1.44049	0	4.49843	22.4921	118.38		0.0164496	1.76296		0.0523913	0.148589	0.2	0.0294724	0.259794		4.02491	15.4927	0.98224
	9.96	0.38186	0.038356							10	60	256.704	6.72	255.36	0	1.31643	0.0344615	1.30954	0	4.49843	26.9906	142.056		0.0151474	1.91452		0.0523913	0.164192	0.166667	0.0294724	0.338553		4.82989	14.2663	0.756027
	7.91	0.31919	0.04036							10	70	245.952	8.064	241.92	0	1.26129	0.0413538	1.24062	0	4.49843	31.489	165.731		0.0140985	2.05696		0.0523913	0.178292	0.142857	0.0294724	0.424365		5.63487	13.2784	0.605559
	6.28	0.26427	0.042066							10	80	219.072	6.72	215.04	0	1.12345	0.0344615	1.10277	0	4.49843	35.9874	189.407		0.0132297	2.19204		0.0523913	0.191206	0.125	0.0294724	0.516837		6.43985	12.4601	0.499436
	4.99	0.21764	0.043613							10	90	209.664	5.376	208.32	0	1.0752	0.0275692	1.06831	0	4.49843	40.4858	213.083		0.0124947	2.32099		0.0523913	0.203155	0.111111	0.0294724	0.615647		7.24483	11.7678	0.421244
	3.96	0.17928	0.045225							10	100	194.88	5.376	196.224	0	0.999385	0.0275692	1.00628	0	4.49843	44.9843	236.759		0.0118622	2.44474		0.0523913	0.214302	0.1	0.0294724	0.720524		8.04981	11.1722	0.361644
	3.15	0.1465	0.046493							10	120	186.816	5.376	186.816	0	0.958031	0.0275692	0.958031	0	4.49843	53.9811	284.111		0.0108238	2.67928		0.0523913	0.234651	0.0833333	0.0294724	0.947578		9.65978	10.1942	0.277594
	2.5	0.11957	0.047758							10	140	170.688	4.032	169.344	0	0.875323	0.0206769	0.868431	0	4.49843	62.978	331.463		0.010001	2.89971		0.0523913	0.252948	0.0714286	0.0294724	1.19646		11.2697	9.41921	0.22186
	1.99	0.096341	0.048488							10	150	166.656	4.032	166.656	0	0.854646	0.0206769	0.854646	0	4.49843	67.4764	355.139		0.00964889	3.00553		0.0523913	0.261475	0.0666667	0.0294724	1.3287		12.0747	9.0876	0.200658
	1.58	0.078282	0.049568							20	20				0	0	0	0	0	8.99685	8.99685	47.3518		0.023831	1.2169		0.104783	0.0861062	1	0.0589449	0.07173		1.60996	22.4447	4.4478
	1.25	0.063052	0.05026							20	30				0	0	0	0	0	8.99685	13.4953	71.0278		0.0204176	1.42035		0.104783	0.110659	0.666667	0.0589449	0.125583		2.41494	19.2298	2.5066
	0.996	0.050336	0.050544							20	40				0	0	0	0	0	8.99685	17.9937	94.7037		0.0181287	1.59967		0.104783	0.131005	0.5	0.0589449	0.188585		3.21993	17.0741	1.66408
	0.792	0.040376	0.050958							20	50	532.68	19.3	389.86	0	2.73169	0.0989744	1.99928	0	8.99685	22.4921	118.38		0.0164496	1.76296		0.104783	0.148589	0.4	0.0589449	0.259794		4.02491	15.4927	1.20928
	0.629	0.032156	0.051132							20	60	490.22	15.44	389.86	0	2.51395	0.0791795	1.99928	0	8.99685	26.9906	142.056		0.0151474	1.91452		0.104783	0.164192	0.333333	0.0589449	0.338553		4.82989	14.2663	0.930778
	0.499	0.025225	0.050504							20	70	428.46	19.3	389.86	0	2.19723	0.0989744	1.99928	0	8.99685	31.489	165.731		0.0140985	2.05696		0.104783	0.178292	0.285714	0.0589449	0.424365		5.63487	13.2784	0.74553
	0.397	0.020605	0.051909							20	80	397.58	11.58	389.86	0	2.03887	0.0593846	1.99928	0	8.99685	35.9874	189.407		0.0132297	2.19204		0.104783	0.191206	0.25	0.0589449	0.516837		6.43985	12.4601	0.614878
	0.316	0.016318	0.051671							20	90	366.7	11.58	389.86	0	1.88051	0.0593846	1.99928	0	8.99685	40.4858	213.083		0.0124947	2.32099		0.104783	0.203155	0.222222	0.0589449	0.615647		7.24483	11.7678	0.518613
	0.251	0.012709	0.050663							20	100	355.12	7.72	343.54	0	1.82113	0.0395897	1.76174	0	8.99685	44.9843	236.759		0.0118622	2.44474		0.104783	0.214302	0.2	0.0589449	0.720524		8.04981	11.1722	0.445236
	0.199	0.010452	0.05241							20	120	335.82	11.58	320.38	0	1.72215	0.0593846	1.64297	0	8.99685	53.9811	284.111		0.0108238	2.67928		0.104783	0.234651	0.166667	0.0589449	0.947578		9.65978	10.1942	0.341759
	0.158	0.0082648	0.052227							20	140	304.94	7.72	285.64	0	1.56379	0.0395897	1.46482	0	8.99685	62.978	331.463		0.010001	2.89971		0.104783	0.252948	0.142857	0.0589449	1.19646		11.2697	9.41921	0.273141
	0.126	0.0070027	0.055722							20	150	262.48	7.72	247.04	0	1.34605	0.0395897	1.26687	0	8.99685	67.4764	355.139		0.00964889	3.00553		0.104783	0.261475	0.133333	0.0589449	1.3287		12.0747	9.0876	0.247039
	0.0999	0.0053742	0.053811							40	40				0	0	0	0	0	17.9937	17.9937	94.7037		0.0181287	1.59967		0.209565	0.131005	1	0.11789	0.188585		3.21993	17.0741	2.04872
	0.0793	0.0043499	0.054878							40	50				0	0	0	0	0	17.9937	22.4921	118.38		0.0164496	1.76296		0.209565	0.148589	0.8	0.11789	0.259794		4.02491	15.4927	1.4888
	0.063	0.0036607	0.05815							40	60				0	0	0	0	0	17.9937	26.9906	142.056		0.0151474	1.91452		0.209565	0.164192	0.666667	0.11789	0.338553		4.82989	14.2663	1.14592
	0.05	0.0033538	0.067058							40	70				0	0	0	0	0	17.9937	31.489	165.731		0.0140985	2.05696		0.209565	0.178292	0.571429	0.11789	0.424365		5.63487	13.2784	0.917856
										40	80				0	0	0	0	0	17.9937	35.9874	189.407		0.0132297	2.19204		0.209565	0.191206	0.5	0.11789	0.516837		6.43985	12.4601	0.757004
										40	90	532.68	15.44	389.86	0	2.73169	0.0791795	1.99928	0	17.9937	40.4858	213.083		0.0124947	2.32099		0.209565	0.203155	0.444444	0.11789	0.615647		7.24483	11.7678	0.638487
										40	100	494.08	11.58	389.86	0	2.53374	0.0593846	1.99928	0	17.9937	44.9843	236.759		0.0118622	2.44474		0.209565	0.214302	0.4	0.11789	0.720524		8.04981	11.1722	0.54815
	Cross Model Viscosity									40	120	413.02	7.72	389.86	0	2.11805	0.0395897	1.99928	0	17.9937	53.9811	284.111		0.0108238	2.67928		0.209565	0.234651	0.333333	0.11789	0.947578		9.65978	10.1942	0.420754
	\eta=0.056/(1+(0.034*x)^0.63)									40	140	397.58	7.72	389.86	0	2.03887	0.0395897	1.99928	0	17.9937	62.978	331.463		0.010001	2.89971		0.209565	0.252948	0.285714	0.11789	1.19646		11.2697	9.41921	0.336276
										40	150	378.28	11.58	389.86	0	1.9399	0.0593846	1.99928	0	17.9937	67.4764	355.139		0.00964889	3.00553		0.209565	0.261475	0.266667	0.11789	1.3287		12.0747	9.0876	0.304141
										60	60				0	0	0	0	0	26.9906	26.9906	142.056		0.0151474	1.91452		0.314348	0.164192	1	0.176835	0.338553		4.82989	14.2663	1.29414
										60	70	710.24	19.3	389.86	0	3.64226	0.0989744	1.99928	0	26.9906	31.489	165.731		0.0140985	2.05696		0.314348	0.178292	0.857143	0.176835	0.424365		5.63487	13.2784	1.03658
										60	80	656.2	15.44	389.86	0	3.36513	0.0791795	1.99928	0	26.9906	35.9874	189.407		0.0132297	2.19204		0.314348	0.191206	0.75	0.176835	0.516837		6.43985	12.4601	0.85492
										60	90	617.6	15.44	389.86	0	3.16718	0.0791795	1.99928	0	26.9906	40.4858	213.083		0.0124947	2.32099		0.314348	0.203155	0.666667	0.176835	0.615647		7.24483	11.7678	0.721073
										60	100	563.56	15.44	389.86	0	2.89005	0.0791795	1.99928	0	26.9906	44.9843	236.759		0.0118622	2.44474		0.314348	0.214302	0.6	0.176835	0.720524		8.04981	11.1722	0.619052
										60	120	501.8	15.44	389.86	0	2.57333	0.0791795	1.99928	0	26.9906	53.9811	284.111		0.0108238	2.67928		0.314348	0.234651	0.5	0.176835	0.947578		9.65978	10.1942	0.475177
										60	140	436.18	11.58	389.86	0	2.23682	0.0593846	1.99928	0	26.9906	62.978	331.463		0.010001	2.89971		0.314348	0.252948	0.428571	0.176835	1.19646		11.2697	9.41921	0.379773
										60	150	413.02	7.72	389.86	0	2.11805	0.0395897	1.99928	0	26.9906	67.4764	355.139		0.00964889	3.00553		0.314348	0.261475	0.4	0.176835	1.3287		12.0747	9.0876	0.34348
										80	80	772	27.02	389.86	0	3.95897	0.138564	1.99928	0	35.9874	35.9874	189.407		0.0132297	2.19204		0.41913	0.191206	1	0.23578	0.516837		6.43985	12.4601	0.931981
										80	90	644.62	19.3	389.86	0	3.30574	0.0989744	1.99928	0	35.9874	40.4858	213.083		0.0124947	2.32099		0.41913	0.203155	0.888889	0.23578	0.615647		7.24483	11.7678	0.78607
										80	100	586.72	11.58	389.86	0	3.00882	0.0593846	1.99928	0	35.9874	44.9843	236.759		0.0118622	2.44474		0.41913	0.214302	0.8	0.23578	0.720524		8.04981	11.1722	0.674852
										80	120	551.98	15.44	389.86	0	2.83067	0.0791795	1.99928	0	35.9874	53.9811	284.111		0.0108238	2.67928		0.41913	0.234651	0.666667	0.23578	0.947578		9.65978	10.1942	0.518009
										80	140	524.96	15.44	389.86	0	2.6921	0.0791795	1.99928	0	35.9874	62.978	331.463		0.010001	2.89971		0.41913	0.252948	0.571429	0.23578	1.19646		11.2697	9.41921	0.414005
										80	150	501.8	19.3	389.86	0	2.57333	0.0989744	1.99928	0	35.9874	67.4764	355.139		0.00964889	3.00553		0.41913	0.261475	0.533333	0.23578	1.3287		12.0747	9.0876	0.374441
										100	100				0	0	0	0	0	44.9843	44.9843	236.759		0.0118622	2.44474		0.523913	0.214302	1	0.294724	0.720524		8.04981	11.1722	0.721575
										100	120	772	34.74	389.86	0	3.95897	0.178154	1.99928	0	44.9843	53.9811	284.111		0.0108238	2.67928		0.523913	0.234651	0.833333	0.294724	0.947578		9.65978	10.1942	0.553873
										100	140	617.6	19.3	389.86	0	3.16718	0.0989744	1.99928	0	44.9843	62.978	331.463		0.010001	2.89971		0.523913	0.252948	0.714286	0.294724	1.19646		11.2697	9.41921	0.442668
										100	150	575.14	15.44	389.86	0	2.94944	0.0791795	1.99928	0	44.9843	67.4764	355.139		0.00964889	3.00553		0.523913	0.261475	0.666667	0.294724	1.3287		12.0747	9.0876	0.400365

## Sheet: Tween 1
	Rheology
	Shear Rate	Shear Stress	Viscosity	Temperature	Torque	Status
								Etching Depth [um]	Width [um]	Qd [ul/min]	Qc [ul/min]	L [um]	L_SD [um]	H [um]	H_SD [um]	L/Width	L/width_SD	H/width	H/width_SD	U_d [mm/s]	U_c [mm/s]	Shear Rate_c [1/s]	Eta_d [Pa*s]	Eta_c [Pa*s]	Alpha=eta_d/eta_c	Interfacial Tension [mN*m]	Ca_d	Ca_c	q=Qd/Qc	Re_d	Re_c	Lambda_s	Wi_c	El_d	Ca_c^(-0.5)*alpha^(-0.6)*Re_c^(-0.2)*q^0.3*Wi^(-0.3)
	[1/s]	[Pa]	[Pa·s]	[°C]	[µN·m]			190	195	5	10	322.56	8.064	321.216	0	1.65415	0.0413538	1.64726	0	2.24921	4.49843	23.6759	0.029	0.0299104	0.969562	1.83	0.0356433	0.0735244	0.5	0.0147362	0.0285754	0.034	0.804981	28.1705	6.63125
	500	4.1273	0.0082511							5	20	303.744	8.064	302.4	0	1.55766	0.0413538	1.55077	0	2.24921	8.99685	47.3518		0.023831	1.2169		0.0356433	0.117161	0.25	0.0147362	0.07173		1.60996	22.4447	2.51566
	396	3.6928	0.0093211							5	30	275.52	8.064	272.832	0	1.41292	0.0413538	1.39914	0	2.24921	13.4953	71.0278		0.0204176	1.42035		0.0356433	0.150569	0.166667	0.0147362	0.125583		2.41494	19.2298	1.41773
	315	3.2436	0.010307							5	40	249.984	8.064	245.952	0	1.28197	0.0413538	1.26129	0	2.24921	17.9937	94.7037		0.0181287	1.59967		0.0356433	0.178253	0.125	0.0147362	0.188585		3.21993	17.0741	0.941198
	250	2.8987	0.011596							5	50	219.072	6.72	217.728	0	1.12345	0.0344615	1.11655	0	2.24921	22.4921	118.38		0.0164496	1.76296		0.0356433	0.202178	0.1	0.0147362	0.259794		4.02491	15.4927	0.683966
	199	2.5502	0.012844							5	60	194.88	4.032	194.88	0	0.999385	0.0206769	0.999385	0	2.24921	26.9906	142.056		0.0151474	1.91452		0.0356433	0.223408	0.0833333	0.0147362	0.338553		4.82989	14.2663	0.526446
	158	2.2552	0.014299							5	70	190.848	4.032	189.504	0	0.978708	0.0206769	0.971815	0	2.24921	31.489	165.731		0.0140985	2.05696		0.0356433	0.242594	0.0714286	0.0147362	0.424365		5.63487	13.2784	0.421671
	125	1.9869	0.015859							5	80	184.128	5.376	184.128	0	0.944246	0.0275692	0.944246	0	2.24921	35.9874	189.407		0.0132297	2.19204		0.0356433	0.260166	0.0625	0.0147362	0.516837		6.43985	12.4601	0.347774
	99.5	1.7403	0.017488							5	90	178.752	4.032	178.752	0	0.916677	0.0206769	0.916677	0	2.24921	40.4858	213.083		0.0124947	2.32099		0.0356433	0.276425	0.0555556	0.0147362	0.615647		7.24483	11.7678	0.293326
	79	1.5282	0.019333							5	100	190.848	4.032	188.16	0	0.978708	0.0206769	0.964923	0	2.24921	44.9843	236.759		0.0118622	2.44474		0.0356433	0.291592	0.05	0.0147362	0.720524		8.04981	11.1722	0.251825
	62.8	1.3328	0.021225							5	120	178.752	2.688	177.408	0	0.916677	0.0137846	0.909785	0	2.24921	53.9811	284.111		0.0108238	2.67928		0.0356433	0.319279	0.0416667	0.0147362	0.947578		9.65978	10.1942	0.193298
	49.9	1.1589	0.023234							5	140	170.688	4.032	170.688	0	0.875323	0.0206769	0.875323	0	2.24921	62.978	331.463		0.010001	2.89971		0.0356433	0.344176	0.0357143	0.0147362	1.19646		11.2697	9.41921	0.154488
	39.6	1.0052	0.025368							5	150	163.968	4.032	162.624	0	0.840862	0.0206769	0.833969	0	2.24921	67.4764	355.139		0.00964889	3.00553		0.0356433	0.355777	0.0333333	0.0147362	1.3287		12.0747	9.0876	0.139725
	31.5	0.86672	0.027537							10	10				0	0	0	0	0	4.49843	4.49843	23.6759		0.0299104	0.969562		0.0712865	0.0735244	1	0.0294724	0.0285754		0.804981	28.1705	8.16403
	25	0.74364	0.029743							10	20	381.696	10.752	383.04	0	1.95742	0.0551385	1.96431	0	4.49843	8.99685	47.3518		0.023831	1.2169		0.0712865	0.117161	0.5	0.0294724	0.07173		1.60996	22.4447	3.09715
	19.9	0.63425	0.031934							10	30	350.784	8.064	349.44	0	1.79889	0.0413538	1.792	0	4.49843	13.4953	71.0278		0.0204176	1.42035		0.0712865	0.150569	0.333333	0.0294724	0.125583		2.41494	19.2298	1.74543
	15.8	0.53893	0.034159							10	40	329.28	6.72	327.936	0	1.68862	0.0344615	1.68172	0	4.49843	17.9937	94.7037		0.0181287	1.59967		0.0712865	0.178253	0.25	0.0294724	0.188585		3.21993	17.0741	1.15875
	12.5	0.45505	0.036308							10	50	315.84	6.72	315.84	0	1.61969	0.0344615	1.61969	0	4.49843	22.4921	118.38		0.0164496	1.76296		0.0712865	0.202178	0.2	0.0294724	0.259794		4.02491	15.4927	0.842061
	9.96	0.38186	0.038356							10	60	303.744	5.376	302.4	0	1.55766	0.0275692	1.55077	0	4.49843	26.9906	142.056		0.0151474	1.91452		0.0712865	0.223408	0.166667	0.0294724	0.338553		4.82989	14.2663	0.648131
	7.91	0.31919	0.04036							10	70	295.68	6.72	295.68	0	1.51631	0.0344615	1.51631	0	4.49843	31.489	165.731		0.0140985	2.05696		0.0712865	0.242594	0.142857	0.0294724	0.424365		5.63487	13.2784	0.519137
	6.28	0.26427	0.042066							10	80	275.52	6.72	272.832	0	1.41292	0.0344615	1.39914	0	4.49843	35.9874	189.407		0.0132297	2.19204		0.0712865	0.260166	0.125	0.0294724	0.516837		6.43985	12.4601	0.42816
	4.99	0.21764	0.043613							10	90	229.824	8.064	228.48	0	1.17858	0.0413538	1.17169	0	4.49843	40.4858	213.083		0.0124947	2.32099		0.0712865	0.276425	0.111111	0.0294724	0.615647		7.24483	11.7678	0.361127
	3.96	0.17928	0.045225							10	100	215.04	9.408	215.04	0	1.10277	0.0482462	1.10277	0	4.49843	44.9843	236.759		0.0118622	2.44474		0.0712865	0.291592	0.1	0.0294724	0.720524		8.04981	11.1722	0.310033
	3.15	0.1465	0.046493							10	120	196.224	6.72	192.192	0	1.00628	0.0344615	0.9856	0	4.49843	53.9811	284.111		0.0108238	2.67928		0.0712865	0.319279	0.0833333	0.0294724	0.947578		9.65978	10.1942	0.237978
	2.5	0.11957	0.047758							10	140	185.472	5.376	184.128	0	0.951138	0.0275692	0.944246	0	4.49843	62.978	331.463		0.010001	2.89971		0.0712865	0.344176	0.0714286	0.0294724	1.19646		11.2697	9.41921	0.190197
	1.99	0.096341	0.048488							10	150	166.656	4.032	166.656	0	0.854646	0.0206769	0.854646	0	4.49843	67.4764	355.139		0.00964889	3.00553		0.0712865	0.355777	0.0666667	0.0294724	1.3287		12.0747	9.0876	0.172021
	1.58	0.078282	0.049568							20	20				0	0	0	0	0	8.99685	8.99685	47.3518		0.023831	1.2169		0.142573	0.117161	1	0.0589449	0.07173		1.60996	22.4447	3.81304
	1.25	0.063052	0.05026							20	30				0	0	0	0	0	8.99685	13.4953	71.0278		0.0204176	1.42035		0.142573	0.150569	0.666667	0.0589449	0.125583		2.41494	19.2298	2.14887
	0.996	0.050336	0.050544							20	40				0	0	0	0	0	8.99685	17.9937	94.7037		0.0181287	1.59967		0.142573	0.178253	0.5	0.0589449	0.188585		3.21993	17.0741	1.42659
	0.792	0.040376	0.050958							20	50				0	0	0	0	0	8.99685	22.4921	118.38		0.0164496	1.76296		0.142573	0.202178	0.4	0.0589449	0.259794		4.02491	15.4927	1.0367
	0.629	0.032156	0.051132							20	60				0	0	0	0	0	8.99685	26.9906	142.056		0.0151474	1.91452		0.142573	0.223408	0.333333	0.0589449	0.338553		4.82989	14.2663	0.797943
	0.499	0.025225	0.050504							20	70	764.28	11.58	389.86	0	3.91938	0.0593846	1.99928	0	8.99685	31.489	165.731		0.0140985	2.05696		0.142573	0.242594	0.285714	0.0589449	0.424365		5.63487	13.2784	0.639133
	0.397	0.020605	0.051909							20	80	463.2	15.44	389.86	0	2.37538	0.0791795	1.99928	0	8.99685	35.9874	189.407		0.0132297	2.19204		0.142573	0.260166	0.25	0.0589449	0.516837		6.43985	12.4601	0.527127
	0.316	0.016318	0.051671							20	90	420.74	11.58	389.86	0	2.15764	0.0593846	1.99928	0	8.99685	40.4858	213.083		0.0124947	2.32099		0.142573	0.276425	0.222222	0.0589449	0.615647		7.24483	11.7678	0.4446
	0.251	0.012709	0.050663							20	100	382.14	15.44	389.86	0	1.95969	0.0791795	1.99928	0	8.99685	44.9843	236.759		0.0118622	2.44474		0.142573	0.291592	0.2	0.0589449	0.720524		8.04981	11.1722	0.381695
	0.199	0.010452	0.05241							20	120	339.68	11.58	366.7	0	1.74195	0.0593846	1.88051	0	8.99685	53.9811	284.111		0.0108238	2.67928		0.142573	0.319279	0.166667	0.0589449	0.947578		9.65978	10.1942	0.292985
	0.158	0.0082648	0.052227							20	140	324.24	7.72	347.4	0	1.66277	0.0395897	1.78154	0	8.99685	62.978	331.463		0.010001	2.89971		0.142573	0.344176	0.142857	0.0589449	1.19646		11.2697	9.41921	0.23416
	0.126	0.0070027	0.055722							20	150	308.8	11.58	324.24	0	1.58359	0.0593846	1.66277	0	8.99685	67.4764	355.139		0.00964889	3.00553		0.142573	0.355777	0.133333	0.0589449	1.3287		12.0747	9.0876	0.211783
	0.0999	0.0053742	0.053811							40	40	768.14	19.3	389.86	0	3.93918	0.0989744	1.99928	0	17.9937	17.9937	94.7037		0.0181287	1.59967		0.285146	0.178253	1	0.11789	0.188585		3.21993	17.0741	1.75634
	0.0793	0.0043499	0.054878							40	50	737.26	15.44	389.86	0	3.78082	0.0791795	1.99928	0	17.9937	22.4921	118.38		0.0164496	1.76296		0.285146	0.202178	0.8	0.11789	0.259794		4.02491	15.4927	1.27633
	0.063	0.0036607	0.05815							40	60	644.62	19.3	389.86	0	3.30574	0.0989744	1.99928	0	17.9937	26.9906	142.056		0.0151474	1.91452		0.285146	0.223408	0.666667	0.11789	0.338553		4.82989	14.2663	0.982383
	0.05	0.0033538	0.067058							40	70	617.6	15.44	389.86	0	3.16718	0.0791795	1.99928	0	17.9937	31.489	165.731		0.0140985	2.05696		0.285146	0.242594	0.571429	0.11789	0.424365		5.63487	13.2784	0.786865
										40	80	590.58	15.44	389.86	0	3.02862	0.0791795	1.99928	0	17.9937	35.9874	189.407		0.0132297	2.19204		0.285146	0.260166	0.5	0.11789	0.516837		6.43985	12.4601	0.648969
										40	90	548.12	11.58	389.86	0	2.81087	0.0593846	1.99928	0	17.9937	40.4858	213.083		0.0124947	2.32099		0.285146	0.276425	0.444444	0.11789	0.615647		7.24483	11.7678	0.547366
										40	100	536.54	15.44	389.86	0	2.75149	0.0791795	1.99928	0	17.9937	44.9843	236.759		0.0118622	2.44474		0.285146	0.291592	0.4	0.11789	0.720524		8.04981	11.1722	0.469922
	Cross Model Viscosity									40	120	463.2	11.58	389.86	0	2.37538	0.0593846	1.99928	0	17.9937	53.9811	284.111		0.0108238	2.67928		0.285146	0.319279	0.333333	0.11789	0.947578		9.65978	10.1942	0.360707
	\eta=0.056/(1+(0.034*x)^0.63)									40	140	409.16	7.72	389.86	0	2.09826	0.0395897	1.99928	0	17.9937	62.978	331.463		0.010001	2.89971		0.285146	0.344176	0.285714	0.11789	1.19646		11.2697	9.41921	0.288285
										40	150	389.86	7.72	389.86	0	1.99928	0.0395897	1.99928	0	17.9937	67.4764	355.139		0.00964889	3.00553		0.285146	0.355777	0.266667	0.11789	1.3287		12.0747	9.0876	0.260736
										60	60	876.22	54.04	389.86	0	4.49344	0.277128	1.99928	0	26.9906	26.9906	142.056		0.0151474	1.91452		0.427719	0.223408	1	0.176835	0.338553		4.82989	14.2663	1.10945
										60	70	710.24	30.88	389.86	0	3.64226	0.158359	1.99928	0	26.9906	31.489	165.731		0.0140985	2.05696		0.427719	0.242594	0.857143	0.176835	0.424365		5.63487	13.2784	0.888644
										60	80	606.02	27.02	389.86	0	3.10779	0.138564	1.99928	0	26.9906	35.9874	189.407		0.0132297	2.19204		0.427719	0.260166	0.75	0.176835	0.516837		6.43985	12.4601	0.732911
										60	90	555.84	19.3	389.86	0	2.85046	0.0989744	1.99928	0	26.9906	40.4858	213.083		0.0124947	2.32099		0.427719	0.276425	0.666667	0.176835	0.615647		7.24483	11.7678	0.618166
										60	100	532.68	15.44	389.86	0	2.73169	0.0791795	1.99928	0	26.9906	44.9843	236.759		0.0118622	2.44474		0.427719	0.291592	0.6	0.176835	0.720524		8.04981	11.1722	0.530705
										60	120	540.4	19.3	389.86	0	2.77128	0.0989744	1.99928	0	26.9906	53.9811	284.111		0.0108238	2.67928		0.427719	0.319279	0.5	0.176835	0.947578		9.65978	10.1942	0.407363
										60	140	497.94	15.44	389.86	0	2.55354	0.0791795	1.99928	0	26.9906	62.978	331.463		0.010001	2.89971		0.427719	0.344176	0.428571	0.176835	1.19646		11.2697	9.41921	0.325574
										60	150	478.64	15.44	389.86	0	2.45456	0.0791795	1.99928	0	26.9906	67.4764	355.139		0.00964889	3.00553		0.427719	0.355777	0.4	0.176835	1.3287		12.0747	9.0876	0.294461
										80	80				0	0	0	0	0	35.9874	35.9874	189.407		0.0132297	2.19204		0.570292	0.260166	1	0.23578	0.516837		6.43985	12.4601	0.798975
										80	90				0	0	0	0	0	35.9874	40.4858	213.083		0.0124947	2.32099		0.570292	0.276425	0.888889	0.23578	0.615647		7.24483	11.7678	0.673887
										80	100	772	15.44	389.86	0	3.95897	0.0791795	1.99928	0	35.9874	44.9843	236.759		0.0118622	2.44474		0.570292	0.291592	0.8	0.23578	0.720524		8.04981	11.1722	0.578542
										80	120	656.2	23.16	389.86	0	3.36513	0.118769	1.99928	0	35.9874	53.9811	284.111		0.0108238	2.67928		0.570292	0.319279	0.666667	0.23578	0.947578		9.65978	10.1942	0.444082
										80	140	594.44	23.16	389.86	0	3.04841	0.118769	1.99928	0	35.9874	62.978	331.463		0.010001	2.89971		0.570292	0.344176	0.571429	0.23578	1.19646		11.2697	9.41921	0.354921
										80	150	536.54	19.3	389.86	0	2.75149	0.0989744	1.99928	0	35.9874	67.4764	355.139		0.00964889	3.00553		0.570292	0.355777	0.533333	0.23578	1.3287		12.0747	9.0876	0.321003
										100	100				0	0	0	0	0	44.9843	44.9843	236.759		0.0118622	2.44474		0.712865	0.291592	1	0.294724	0.720524		8.04981	11.1722	0.618597
										100	120	644.62	15.44	389.86	0	3.30574	0.0791795	1.99928	0	44.9843	53.9811	284.111		0.0108238	2.67928		0.712865	0.319279	0.833333	0.294724	0.947578		9.65978	10.1942	0.474828
										100	140	590.58	15.44	389.86	0	3.02862	0.0791795	1.99928	0	44.9843	62.978	331.463		0.010001	2.89971		0.712865	0.344176	0.714286	0.294724	1.19646		11.2697	9.41921	0.379493
										100	150	540.4	23.16	389.86	0	2.77128	0.118769	1.99928	0	44.9843	67.4764	355.139		0.00964889	3.00553		0.712865	0.355777	0.666667	0.294724	1.3287		12.0747	9.0876	0.343228
