# Supplementary material for: Dimensional analysis meets AI for non-Newtonian droplet generation
Source: Lab Chip. 2025 Feb 12;25(7):1681–93. doi: 10.1039/d4lc00946k (PMC11834948; doi:10.1039/d4lc00946k)
Supplement: LC-025-D4LC00946K-s004 [file LC-025-D4LC00946K-s004.xlsx]

## Sheet: No Surfactant
	Rheology
	Shear Rate	Shear Stress	Viscosity	Temperature	Torque	Status
								Etching Depth [um]	Width [um]	Qd [ul/min]	Qc [ul/min]	L [um]	L_SD [um]	H [um]	H_SD [um]	L/Width	L/width_SD	H/width	H/width_SD	U_d [mm/s]	U_c [mm/s]	Shear Rate_c [1/s]	Eta_d [Pa*s]	Eta_c [Pa*s]	Alpha=eta_d/eta_c	Interfacial Tension [mN*m]	Ca_d	Ca_c	q=Qd/Qc	Re_d	Re_c	Lambda_s	Wi_c	El_d	Ca_c^(-0.5)*alpha^(-0.6)*Re_c^(-0.2)*q^0.3*Wi^(-0.3)
	[1/s]	[Pa]	[Pa·s]	[°C]	[µN·m]			190	195	5	10	381.804	10.752	375.299	0	1.95797	0.0551385	1.92461	0	2.24921	4.49843	23.6759	0.029	0.358353	0.0809257	25	0.00260909	0.064481	0.5	0.0147362	0.00238508	0.156	3.69344	1548.56	32.6884
	500	27.779	0.055537							5	20	313.152	12.096	282.24	0	1.60591	0.0620308	1.44738	0	2.24921	8.99685	47.3518		0.244033	0.118836		0.00260909	0.0878211	0.25	0.0147362	0.0070048		7.38689	1054.55	11.8303
	396	25.696	0.064833							5	30	272.832	10.752	241.92	0	1.39914	0.0551385	1.24062	0	2.24921	13.4953	71.0278		0.191293	0.1516		0.00260909	0.103262	0.166667	0.0147362	0.0134041		11.0803	826.641	6.4916
	315	23.775	0.075512							5	40	236.544	10.752	213.696	0	1.21305	0.0551385	1.09588	0	2.24921	17.9937	94.7037		0.159857	0.181412		0.00260909	0.115057	0.125	0.0147362	0.0213867		14.7738	690.794	4.23195
	250	21.914	0.087613							5	50	209.664	6.72	205.632	0	1.0752	0.0344615	1.05452	0	2.24921	22.4921	118.38		0.138619	0.209207		0.00260909	0.124713	0.1	0.0147362	0.0308292		18.4672	599.018	3.03379
	199	20.221	0.10177							5	60	178.752	5.376	174.72	0	0.916677	0.0275692	0.896	0	2.24921	26.9906	142.056		0.123146	0.235492		0.00260909	0.132952	0.0833333	0.0147362	0.0416431		22.1607	532.157	2.31009
	158	18.622	0.11797							5	70	162.624	6.72	155.904	0	0.833969	0.0344615	0.799508	0	2.24921	31.489	165.731		0.111288	0.260585		0.00260909	0.140174	0.0714286	0.0147362	0.0537605		25.8541	480.912	1.83403
	125	17.118	0.13651							5	80	155.904	5.376	147.84	0	0.799508	0.0275692	0.758154	0	2.24921	35.9874	189.407		0.101861	0.284701		0.00260909	0.146629	0.0625	0.0147362	0.0671266		29.5476	440.176	1.50136
	99.6	15.702	0.15763							5	90	151.872	5.376	139.776	0	0.778831	0.0275692	0.7168	0	2.24921	40.4858	213.083		0.0941579	0.307993		0.00260909	0.152482	0.0555556	0.0147362	0.0816959		33.241	406.887	1.25818
	79.1	14.348	0.1813							5	100	139.776	5.376	135.744	0	0.7168	0.0275692	0.696123	0	2.24921	44.9843	236.759		0.087725	0.330578		0.00260909	0.15785	0.05	0.0147362	0.0974296		36.9344	379.089	1.07408
	62.9	13.083	0.20809							5	120	135.744	4.032	132.518	0	0.696123	0.0206769	0.679582	0	2.24921	53.9811	284.111		0.0775473	0.373965		0.00260909	0.167444	0.0416667	0.0147362	0.13226		44.3213	335.108	0.816647
	49.9	11.887	0.23799							5	140	132.518	2.688	119.616	0	0.679582	0.0137846	0.613415	0	2.24921	62.978	331.463		0.0698149	0.415384		0.00260909	0.175872	0.0357143	0.0147362	0.171393		51.7082	301.693	0.647616
	39.7	10.754	0.27102							5	150	123.648	6.72	116.928	0	0.634092	0.0344615	0.599631	0	2.24921	67.4764	355.139		0.0665946	0.435471		0.00260909	0.179742	0.0333333	0.0147362	0.192516		55.4017	287.777	0.583731
	31.5	9.6856	0.30728							10	10	608.026	26.88	389.76	0	3.11808	0.137846	1.99877	0	4.49843	4.49843	23.6759		0.358353	0.0809257		0.00521817	0.064481	1	0.0294724	0.00238508		3.69344	1548.56	40.2441
	25	8.6865	0.3469							10	20	393.658	21.504	389.76	0	2.01876	0.110277	1.99877	0	4.49843	8.99685	47.3518		0.244033	0.118836		0.00521817	0.0878211	0.5	0.0294724	0.0070048		7.38689	1054.55	14.5648
	19.9	7.7544	0.38981							10	30	350.784	20.16	291.648	0	1.79889	0.103385	1.49563	0	4.49843	13.4953	71.0278		0.191293	0.1516		0.00521817	0.103262	0.333333	0.0294724	0.0134041		11.0803	826.641	7.9921
	15.8	6.8825	0.4355							10	40	283.584	16.128	264.768	0	1.45428	0.0827077	1.35778	0	4.49843	17.9937	94.7037		0.159857	0.181412		0.00521817	0.115057	0.25	0.0294724	0.0213867		14.7738	690.794	5.21015
	12.6	6.0773	0.48411							10	50	275.52	13.44	236.544	0	1.41292	0.0689231	1.21305	0	4.49843	22.4921	118.38		0.138619	0.209207		0.00521817	0.124713	0.2	0.0294724	0.0308292		18.4672	599.018	3.73503
	9.97	5.3336	0.53481							10	60	244.608	13.44	225.792	0	1.2544	0.0689231	1.15791	0	4.49843	26.9906	142.056		0.123146	0.235492		0.00521817	0.132952	0.166667	0.0294724	0.0416431		22.1607	532.157	2.84406
	7.92	4.6517	0.58717							10	70	201.6	12.096	190.848	0	1.03385	0.0620308	0.978708	0	4.49843	31.489	165.731		0.111288	0.260585		0.00521817	0.140174	0.142857	0.0294724	0.0537605		25.8541	480.912	2.25796
	6.29	4.032	0.64069							10	80	182.784	12.096	170.688	0	0.937354	0.0620308	0.875323	0	4.49843	35.9874	189.407		0.101861	0.284701		0.00521817	0.146629	0.125	0.0294724	0.0671266		29.5476	440.176	1.84839
	5	3.4736	0.69481							10	90	174.72	6.72	162.624	0	0.896	0.0344615	0.833969	0	4.49843	40.4858	213.083		0.0941579	0.307993		0.00521817	0.152482	0.111111	0.0294724	0.0816959		33.241	406.887	1.549
	3.97	2.9729	0.7486							10	100	162.624	8.064	155.904	0	0.833969	0.0413538	0.799508	0	4.49843	44.9843	236.759		0.087725	0.330578		0.00521817	0.15785	0.1	0.0294724	0.0974296		36.9344	379.089	1.32235
	3.15	2.5258	0.80066							10	120	221.76	13.44	194.88	0	1.13723	0.0689231	0.999385	0	4.49843	53.9811	284.111		0.0775473	0.373965		0.00521817	0.167444	0.0833333	0.0294724	0.13226		44.3213	335.108	1.00541
	2.51	2.1188	0.84555							10	140	213.696	8.064	190.848	0	1.09588	0.0413538	0.978708	0	4.49843	62.978	331.463		0.0698149	0.415384		0.00521817	0.175872	0.0714286	0.0294724	0.171393		51.7082	301.693	0.797309
	1.99	1.7752	0.89182							10	150	205.632	6.72	186.816	0	1.05452	0.0344615	0.958031	0	4.49843	67.4764	355.139		0.0665946	0.435471		0.00521817	0.179742	0.0666667	0.0294724	0.192516		55.4017	287.777	0.718657
	1.58	1.4801	0.93595							20	20				0	0	0	0	0	8.99685	8.99685	47.3518		0.244033	0.118836		0.0104363	0.0878211	1	0.0589449	0.0070048		7.38689	1054.55	17.9314
	1.26	1.2312	0.98027							20	30				0	0	0	0	0	8.99685	13.4953	71.0278		0.191293	0.1516		0.0104363	0.103262	0.666667	0.0589449	0.0134041		11.0803	826.641	9.83943
	0.998	1.0182	1.0205							20	40	397.58	15.44	389.86	0	2.03887	0.0791795	1.99928	0	8.99685	17.9937	94.7037		0.159857	0.181412		0.0104363	0.115057	0.5	0.0589449	0.0213867		14.7738	690.794	6.41444
	0.793	0.83772	1.0569							20	50	362.84	15.44	308.8	0	1.86072	0.0791795	1.58359	0	8.99685	22.4921	118.38		0.138619	0.209207		0.0104363	0.124713	0.4	0.0589449	0.0308292		18.4672	599.018	4.59836
	0.63	0.68287	1.0847							20	60	331.96	23.16	285.64	0	1.70236	0.118769	1.46482	0	8.99685	26.9906	142.056		0.123146	0.235492		0.0104363	0.132952	0.333333	0.0589449	0.0416431		22.1607	532.157	3.50145
	0.5	0.55694	1.1139							20	70	304.94	7.72	247.04	0	1.56379	0.0395897	1.26687	0	8.99685	31.489	165.731		0.111288	0.260585		0.0104363	0.140174	0.285714	0.0589449	0.0537605		25.8541	480.912	2.77987
	0.397	0.45021	1.1332							20	80	293.36	15.44	239.32	0	1.50441	0.0791795	1.22728	0	8.99685	35.9874	189.407		0.101861	0.284701		0.0104363	0.146629	0.25	0.0589449	0.0671266		29.5476	440.176	2.27564
	0.316	0.36463	1.1534							20	90	277.92	11.58	235.46	0	1.42523	0.0593846	1.20749	0	8.99685	40.4858	213.083		0.0941579	0.307993		0.0104363	0.152482	0.222222	0.0589449	0.0816959		33.241	406.887	1.90704
	0.251	0.29397	1.1706							20	100	254.76	11.58	216.16	0	1.30646	0.0593846	1.10851	0	8.99685	44.9843	236.759		0.087725	0.330578		0.0104363	0.15785	0.2	0.0589449	0.0974296		36.9344	379.089	1.628
	0.199	0.23684	1.1874							20	120	231.6	11.58	193	0	1.18769	0.0593846	0.989744	0	8.99685	53.9811	284.111		0.0775473	0.373965		0.0104363	0.167444	0.166667	0.0589449	0.13226		44.3213	335.108	1.2378
	0.158	0.18875	1.192							20	140	208.44	7.72	177.56	0	1.06892	0.0395897	0.910564	0	8.99685	62.978	331.463		0.0698149	0.415384		0.0104363	0.175872	0.142857	0.0589449	0.171393		51.7082	301.693	0.981603
	0.126	0.15092	1.2							20	150	181.42	7.72	162.12	0	0.930359	0.0395897	0.831385	0	8.99685	67.4764	355.139		0.0665946	0.435471		0.0104363	0.179742	0.133333	0.0589449	0.192516		55.4017	287.777	0.884771
	0.1	0.12295	1.2301							40	40				0	0	0	0	0	17.9937	17.9937	94.7037		0.159857	0.181412		0.0208727	0.115057	1	0.11789	0.0213867		14.7738	690.794	7.89711
	0.0794	0.098146	1.2357							40	50				0	0	0	0	0	17.9937	22.4921	118.38		0.138619	0.209207		0.0208727	0.124713	0.8	0.11789	0.0308292		18.4672	599.018	5.66125
	0.063	0.076415	1.2132							40	60				0	0	0	0	0	17.9937	26.9906	142.056		0.123146	0.235492		0.0208727	0.132952	0.666667	0.11789	0.0416431		22.1607	532.157	4.31079
	0.0501	0.062041	1.2381							40	70	675.5	61.76	324.24	0	3.4641	0.316718	1.66277	0	17.9937	31.489	165.731		0.111288	0.260585		0.0208727	0.140174	0.571429	0.11789	0.0537605		25.8541	480.912	3.42242
										40	80	482.5	104.22	304.94	0	2.47436	0.534462	1.56379	0	17.9937	35.9874	189.407		0.101861	0.284701		0.0208727	0.146629	0.5	0.11789	0.0671266		29.5476	440.176	2.80164
										40	90	432.32	96.5	270.2	0	2.21703	0.494872	1.38564	0	17.9937	40.4858	213.083		0.0941579	0.307993		0.0208727	0.152482	0.444444	0.11789	0.0816959		33.241	406.887	2.34784
										40	100	316.52	88.78	235.46	0	1.62318	0.455282	1.20749	0	17.9937	44.9843	236.759		0.087725	0.330578		0.0208727	0.15785	0.4	0.11789	0.0974296		36.9344	379.089	2.0043
	Cross Model Viscosity									40	120	301.08	69.48	220.02	0	1.544	0.356308	1.12831	0	17.9937	53.9811	284.111		0.0775473	0.373965		0.0208727	0.167444	0.333333	0.11789	0.13226		44.3213	335.108	1.52392
	\eta=1.28/(1+(0.156*x)^0.723)									40	140	277.92	42.46	193	0	1.42523	0.217744	0.989744	0	17.9937	62.978	331.463		0.0698149	0.415384		0.0208727	0.175872	0.285714	0.11789	0.171393		51.7082	301.693	1.20849
										40	150	250.9	38.6	173.7	0	1.28667	0.197949	0.890769	0	17.9937	67.4764	355.139		0.0665946	0.435471		0.0208727	0.179742	0.266667	0.11789	0.192516		55.4017	287.777	1.08928
										60	60				0	0	0	0	0	26.9906	26.9906	142.056		0.123146	0.235492		0.031309	0.132952	1	0.176835	0.0416431		22.1607	532.157	4.86837
										60	70	864.64	46.32	308.8	0	4.43405	0.237538	1.58359	0	26.9906	31.489	165.731		0.111288	0.260585		0.031309	0.140174	0.857143	0.176835	0.0537605		25.8541	480.912	3.8651
										60	80	829.9	38.6	293.36	0	4.2559	0.197949	1.50441	0	26.9906	35.9874	189.407		0.101861	0.284701		0.031309	0.146629	0.75	0.176835	0.0671266		29.5476	440.176	3.16402
										60	90	598.3	158.26	274.06	0	3.06821	0.81159	1.40544	0	26.9906	40.4858	213.083		0.0941579	0.307993		0.031309	0.152482	0.666667	0.176835	0.0816959		33.241	406.887	2.65152
										60	100	501.8	115.8	266.34	0	2.57333	0.593846	1.36585	0	26.9906	44.9843	236.759		0.087725	0.330578		0.031309	0.15785	0.6	0.176835	0.0974296		36.9344	379.089	2.26356
										60	120	482.5	19.3	239.32	0	2.47436	0.0989744	1.22728	0	26.9906	53.9811	284.111		0.0775473	0.373965		0.031309	0.167444	0.5	0.176835	0.13226		44.3213	335.108	1.72103
										60	140	424.6	19.3	223.88	0	2.17744	0.0989744	1.1481	0	26.9906	62.978	331.463		0.0698149	0.415384		0.031309	0.175872	0.428571	0.176835	0.171393		51.7082	301.693	1.36481
										60	150	397.58	15.44	216.16	0	2.03887	0.0791795	1.10851	0	26.9906	67.4764	355.139		0.0665946	0.435471		0.031309	0.179742	0.4	0.176835	0.192516		55.4017	287.777	1.23018
										80	80				0	0	0	0	0	35.9874	35.9874	189.407		0.101861	0.284701		0.0417454	0.146629	1	0.23578	0.0671266		29.5476	440.176	3.44922
										80	90	953.42	115.8	258.62	0	4.88933	0.593846	1.32626	0	35.9874	40.4858	213.083		0.0941579	0.307993		0.0417454	0.152482	0.888889	0.23578	0.0816959		33.241	406.887	2.89053
										80	100				0	0	0	0	0	35.9874	44.9843	236.759		0.087725	0.330578		0.0417454	0.15785	0.8	0.23578	0.0974296		36.9344	379.089	2.46759
										80	120	772	77.2	243.18	0	3.95897	0.395897	1.24708	0	35.9874	53.9811	284.111		0.0775473	0.373965		0.0417454	0.167444	0.666667	0.23578	0.13226		44.3213	335.108	1.87616
										80	140	656.2	57.9	239.32	0	3.36513	0.296923	1.22728	0	35.9874	62.978	331.463		0.0698149	0.415384		0.0417454	0.175872	0.571429	0.23578	0.171393		51.7082	301.693	1.48783
										80	150	494.08	135.1	250.9	0	2.53374	0.692821	1.28667	0	35.9874	67.4764	355.139		0.0665946	0.435471		0.0417454	0.179742	0.533333	0.23578	0.192516		55.4017	287.777	1.34106
										100	100				0	0	0	0	0	44.9843	44.9843	236.759		0.087725	0.330578		0.0521817	0.15785	1	0.294724	0.0974296		36.9344	379.089	2.63843
										100	120				0	0	0	0	0	44.9843	53.9811	284.111		0.0775473	0.373965		0.0521817	0.167444	0.833333	0.294724	0.13226		44.3213	335.108	2.00606
										100	140				0	0	0	0	0	44.9843	62.978	331.463		0.0698149	0.415384		0.0521817	0.175872	0.714286	0.294724	0.171393		51.7082	301.693	1.59084
										100	150				0	0	0	0	0	44.9843	67.4764	355.139		0.0665946	0.435471		0.0521817	0.179742	0.666667	0.294724	0.192516		55.4017	287.777	1.43391

## Sheet: Span0pt03
	Rheology
	Shear Rate	Shear Stress	Viscosity	Temperature	Torque	Status
								Etching Depth [um]	Width [um]	Qd [ul/min]	Qc [ul/min]	L [um]	L_SD [um]	H [um]	H_SD [um]	L/Width	L/width_SD	H/width	H/width_SD	U_d [mm/s]	U_c [mm/s]	Shear Rate_c [1/s]	Eta_d [Pa*s]	Eta_c [Pa*s]	Alpha=eta_d/eta_c	Interfacial Tension [mN*m]	Ca_d	Ca_c	q=Qd/Qc	Re_d	Re_c	Lambda_s	Wi_c	El_d	Ca_c^(-0.5)*alpha^(-0.6)*Re_c^(-0.2)*q^0.3*Wi^(-0.3)
	[1/s]	[Pa]	[Pa·s]	[°C]	[µN·m]			190	195	5	10	403.2	18.816	389.76	0	2.06769	0.0964923	1.99877	0	2.24921	4.49843	23.6759	0.029	0.358353	0.0809257	9.07	0.00719153	0.177732	0.5	0.0147362	0.00238508	0.156	3.69344	1548.56	19.6891
	500	27.779	0.055537							5	20	279.552	16.128	244.608	0	1.4336	0.0827077	1.2544	0	2.24921	8.99685	47.3518		0.244033	0.118836		0.00719153	0.242065	0.25	0.0147362	0.0070048		7.38689	1054.55	7.12572
	396	25.696	0.064833							5	30	209.664	13.44	201.6	0	1.0752	0.0689231	1.03385	0	2.24921	13.4953	71.0278		0.191293	0.1516		0.00719153	0.284626	0.166667	0.0147362	0.0134041		11.0803	826.641	3.91008
	315	23.775	0.075512							5	40	194.88	10.752	182.784	0	0.999385	0.0551385	0.937354	0	2.24921	17.9937	94.7037		0.159857	0.181412		0.00719153	0.317135	0.125	0.0147362	0.0213867		14.7738	690.794	2.54903
	250	21.914	0.087613							5	50	186.816	6.72	174.72	0	0.958031	0.0344615	0.896	0	2.24921	22.4921	118.38		0.138619	0.209207		0.00719153	0.343752	0.1	0.0147362	0.0308292		18.4672	599.018	1.82734
	199	20.221	0.10177							5	60	168	8.064	158.592	0	0.861538	0.0413538	0.813292	0	2.24921	26.9906	142.056		0.123146	0.235492		0.00719153	0.36646	0.0833333	0.0147362	0.0416431		22.1607	532.157	1.39144
	158	18.622	0.11797							5	70	158.592	8.064	147.84	0	0.813292	0.0413538	0.758154	0	2.24921	31.489	165.731		0.111288	0.260585		0.00719153	0.386367	0.0714286	0.0147362	0.0537605		25.8541	480.912	1.10469
	125	17.118	0.13651							5	80	147.84	6.72	141.12	0	0.758154	0.0344615	0.723692	0	2.24921	35.9874	189.407		0.101861	0.284701		0.00719153	0.404159	0.0625	0.0147362	0.0671266		29.5476	440.176	0.904314
	99.6	15.702	0.15763							5	90	143.808	5.376	139.776	0	0.737477	0.0275692	0.7168	0	2.24921	40.4858	213.083		0.0941579	0.307993		0.00719153	0.420293	0.0555556	0.0147362	0.0816959		33.241	406.887	0.757836
	79.1	14.348	0.1813							5	100	132.384	6.72	128.486	0	0.678892	0.0344615	0.658905	0	2.24921	44.9843	236.759		0.087725	0.330578		0.00719153	0.435088	0.05	0.0147362	0.0974296		36.9344	379.089	0.646949
	62.9	13.083	0.20809							5	120	135.744	5.376	128.352	0	0.696123	0.0275692	0.658215	0	2.24921	53.9811	284.111		0.0775473	0.373965		0.00719153	0.461532	0.0416667	0.0147362	0.13226		44.3213	335.108	0.49189
	49.9	11.887	0.23799							5	140	129.024	5.376	119.616	0	0.661662	0.0275692	0.613415	0	2.24921	62.978	331.463		0.0698149	0.415384		0.00719153	0.484763	0.0357143	0.0147362	0.171393		51.7082	301.693	0.390078
	39.7	10.754	0.27102							5	150	123.648	5.376	116.928	0	0.634092	0.0275692	0.599631	0	2.24921	67.4764	355.139		0.0665946	0.435471		0.00719153	0.495431	0.0333333	0.0147362	0.192516		55.4017	287.777	0.351598
	31.5	9.6856	0.30728							10	10				0	0	0	0	0	4.49843	4.49843	23.6759		0.358353	0.0809257		0.0143831	0.177732	1	0.0294724	0.00238508		3.69344	1548.56	24.2402
	25	8.6865	0.3469							10	20				0	0	0	0	0	4.49843	8.99685	47.3518		0.244033	0.118836		0.0143831	0.242065	0.5	0.0294724	0.0070048		7.38689	1054.55	8.77279
	19.9	7.7544	0.38981							10	30	291.648	21.504	260.736	0	1.49563	0.110277	1.33711	0	4.49843	13.4953	71.0278		0.191293	0.1516		0.0143831	0.284626	0.333333	0.0294724	0.0134041		11.0803	826.641	4.81387
	15.8	6.8825	0.4355							10	40	287.616	13.44	252.672	0	1.47495	0.0689231	1.29575	0	4.49843	17.9937	94.7037		0.159857	0.181412		0.0143831	0.317135	0.25	0.0294724	0.0213867		14.7738	690.794	3.13822
	12.6	6.0773	0.48411							10	50	201.6	13.44	194.88	0	1.03385	0.0689231	0.999385	0	4.49843	22.4921	118.38		0.138619	0.209207		0.0143831	0.343752	0.2	0.0294724	0.0308292		18.4672	599.018	2.24972
	9.97	5.3336	0.53481							10	60	186.816	13.44	178.752	0	0.958031	0.0689231	0.916677	0	4.49843	26.9906	142.056		0.123146	0.235492		0.0143831	0.36646	0.166667	0.0294724	0.0416431		22.1607	532.157	1.71306
	7.92	4.6517	0.58717							10	70	166.656	10.752	158.592	0	0.854646	0.0551385	0.813292	0	4.49843	31.489	165.731		0.111288	0.260585		0.0143831	0.386367	0.142857	0.0294724	0.0537605		25.8541	480.912	1.36003
	6.29	4.032	0.64069							10	80	162.624	5.376	155.904	0	0.833969	0.0275692	0.799508	0	4.49843	35.9874	189.407		0.101861	0.284701		0.0143831	0.404159	0.125	0.0294724	0.0671266		29.5476	440.176	1.11334
	5	3.4736	0.69481							10	90	158.592	6.72	151.872	0	0.813292	0.0344615	0.778831	0	4.49843	40.4858	213.083		0.0941579	0.307993		0.0143831	0.420293	0.111111	0.0294724	0.0816959		33.241	406.887	0.933005
	3.97	2.9729	0.7486							10	100	155.904	5.376	147.84	0	0.799508	0.0275692	0.758154	0	4.49843	44.9843	236.759		0.087725	0.330578		0.0143831	0.435088	0.1	0.0294724	0.0974296		36.9344	379.089	0.796488
	3.15	2.5258	0.80066							10	120	147.84	6.72	135.744	0	0.758154	0.0344615	0.696123	0	4.49843	53.9811	284.111		0.0775473	0.373965		0.0143831	0.461532	0.0833333	0.0294724	0.13226		44.3213	335.108	0.605587
	2.51	2.1188	0.84555							10	140	135.744	5.376	128.352	0	0.696123	0.0275692	0.658215	0	4.49843	62.978	331.463		0.0698149	0.415384		0.0143831	0.484763	0.0714286	0.0294724	0.171393		51.7082	301.693	0.480242
	1.99	1.7752	0.89182							10	150	131.712	5.376	126.336	0	0.675446	0.0275692	0.647877	0	4.49843	67.4764	355.139		0.0665946	0.435471		0.0143831	0.495431	0.0666667	0.0294724	0.192516		55.4017	287.777	0.432868
	1.58	1.4801	0.93595							20	20	586.72	27.02	389.86	0	3.00882	0.138564	1.99928	0	8.99685	8.99685	47.3518		0.244033	0.118836		0.0287661	0.242065	1	0.0589449	0.0070048		7.38689	1054.55	10.8006
	1.26	1.2312	0.98027							20	30	443.9	15.44	324.24	0	2.27641	0.0791795	1.66277	0	8.99685	13.4953	71.0278		0.191293	0.1516		0.0287661	0.284626	0.666667	0.0589449	0.0134041		11.0803	826.641	5.92657
	0.998	1.0182	1.0205							20	40	351.26	11.58	312.66	0	1.80133	0.0593846	1.60338	0	8.99685	17.9937	94.7037		0.159857	0.181412		0.0287661	0.317135	0.5	0.0589449	0.0213867		14.7738	690.794	3.8636
	0.793	0.83772	1.0569							20	50	331.96	11.58	277.92	0	1.70236	0.0593846	1.42523	0	8.99685	22.4921	118.38		0.138619	0.209207		0.0287661	0.343752	0.4	0.0589449	0.0308292		18.4672	599.018	2.76973
	0.63	0.68287	1.0847							20	60	316.52	11.58	262.48	0	1.62318	0.0593846	1.34605	0	8.99685	26.9906	142.056		0.123146	0.235492		0.0287661	0.36646	0.333333	0.0589449	0.0416431		22.1607	532.157	2.10902
	0.5	0.55694	1.1139							20	70	308.8	7.72	258.62	0	1.58359	0.0395897	1.32626	0	8.99685	31.489	165.731		0.111288	0.260585		0.0287661	0.386367	0.285714	0.0589449	0.0537605		25.8541	480.912	1.6744
	0.397	0.45021	1.1332							20	80	274.06	3.86	227.74	0	1.40544	0.0197949	1.1679	0	8.99685	35.9874	189.407		0.101861	0.284701		0.0287661	0.404159	0.25	0.0589449	0.0671266		29.5476	440.176	1.37068
	0.316	0.36463	1.1534							20	90	250.9	7.72	220.02	0	1.28667	0.0395897	1.12831	0	8.99685	40.4858	213.083		0.0941579	0.307993		0.0287661	0.420293	0.222222	0.0589449	0.0816959		33.241	406.887	1.14866
	0.251	0.29397	1.1706							20	100	247.04	7.72	208.44	0	1.26687	0.0395897	1.06892	0	8.99685	44.9843	236.759		0.087725	0.330578		0.0287661	0.435088	0.2	0.0589449	0.0974296		36.9344	379.089	0.980592
	0.199	0.23684	1.1874							20	120	231.6	7.72	196.86	0	1.18769	0.0395897	1.00954	0	8.99685	53.9811	284.111		0.0775473	0.373965		0.0287661	0.461532	0.166667	0.0589449	0.13226		44.3213	335.108	0.745565
	0.158	0.18875	1.192							20	140	200.72	3.86	181.42	0	1.02933	0.0197949	0.930359	0	8.99685	62.978	331.463		0.0698149	0.415384		0.0287661	0.484763	0.142857	0.0589449	0.171393		51.7082	301.693	0.591247
	0.126	0.15092	1.2							20	150	189.14	3.86	165.98	0	0.969949	0.0197949	0.851179	0	8.99685	67.4764	355.139		0.0665946	0.435471		0.0287661	0.495431	0.133333	0.0589449	0.192516		55.4017	287.777	0.532923
	0.1	0.12295	1.2301							40	40	748.84	173.7	362.84	0	3.84021	0.890769	1.86072	0	17.9937	17.9937	94.7037		0.159857	0.181412		0.0575322	0.317135	1	0.11789	0.0213867		14.7738	690.794	4.75665
	0.0794	0.098146	1.2357							40	50	501.8	19.3	320.38	0	2.57333	0.0989744	1.64297	0	17.9937	22.4921	118.38		0.138619	0.209207		0.0575322	0.343752	0.8	0.11789	0.0308292		18.4672	599.018	3.40993
	0.063	0.076415	1.2132							40	60	467.06	15.44	308.8	0	2.39518	0.0791795	1.58359	0	17.9937	26.9906	142.056		0.123146	0.235492		0.0575322	0.36646	0.666667	0.11789	0.0416431		22.1607	532.157	2.59651
	0.0501	0.062041	1.2381							40	70	455.48	11.58	304.94	0	2.33579	0.0593846	1.56379	0	17.9937	31.489	165.731		0.111288	0.260585		0.0575322	0.386367	0.571429	0.11789	0.0537605		25.8541	480.912	2.06142
										40	80	436.18	15.44	277.92	0	2.23682	0.0791795	1.42523	0	17.9937	35.9874	189.407		0.101861	0.284701		0.0575322	0.404159	0.5	0.11789	0.0671266		29.5476	440.176	1.68751
										40	90	409.16	11.58	270.2	0	2.09826	0.0593846	1.38564	0	17.9937	40.4858	213.083		0.0941579	0.307993		0.0575322	0.420293	0.444444	0.11789	0.0816959		33.241	406.887	1.41417
										40	100	393.72	11.58	270.2	0	2.01908	0.0593846	1.38564	0	17.9937	44.9843	236.759		0.087725	0.330578		0.0575322	0.435088	0.4	0.11789	0.0974296		36.9344	379.089	1.20725
	Cross Model Viscosity									40	120	339.68	11.58	239.32	0	1.74195	0.0593846	1.22728	0	17.9937	53.9811	284.111		0.0775473	0.373965		0.0575322	0.461532	0.333333	0.11789	0.13226		44.3213	335.108	0.917899
	\eta=1.28/(1+(0.156*x)^0.723)									40	140	316.52	7.72	231.6	0	1.62318	0.0395897	1.18769	0	17.9937	62.978	331.463		0.0698149	0.415384		0.0575322	0.484763	0.285714	0.11789	0.171393		51.7082	301.693	0.727911
										40	150	289.5	11.58	220.02	0	1.48462	0.0593846	1.12831	0	17.9937	67.4764	355.139		0.0665946	0.435471		0.0575322	0.495431	0.266667	0.11789	0.192516		55.4017	287.777	0.656105
										60	60				0	0	0	0	0	26.9906	26.9906	142.056		0.123146	0.235492		0.0862984	0.36646	1	0.176835	0.0416431		22.1607	532.157	2.93236
										60	70	540.4	27.02	339.68	0	2.77128	0.138564	1.74195	0	26.9906	31.489	165.731		0.111288	0.260585		0.0862984	0.386367	0.857143	0.176835	0.0537605		25.8541	480.912	2.32806
										60	80	524.96	50.18	339.68	0	2.6921	0.257333	1.74195	0	26.9906	35.9874	189.407		0.101861	0.284701		0.0862984	0.404159	0.75	0.176835	0.0671266		29.5476	440.176	1.90578
										60	90	509.52	38.6	328.1	0	2.61292	0.197949	1.68256	0	26.9906	40.4858	213.083		0.0941579	0.307993		0.0862984	0.420293	0.666667	0.176835	0.0816959		33.241	406.887	1.59709
										60	100	482.5	30.88	281.78	0	2.47436	0.158359	1.44503	0	26.9906	44.9843	236.759		0.087725	0.330578		0.0862984	0.435088	0.6	0.176835	0.0974296		36.9344	379.089	1.3634
										60	120	440.04	27.02	270.2	0	2.25662	0.138564	1.38564	0	26.9906	53.9811	284.111		0.0775473	0.373965		0.0862984	0.461532	0.5	0.176835	0.13226		44.3213	335.108	1.03663
										60	140	428.46	96.5	270.2	0	2.19723	0.494872	1.38564	0	26.9906	62.978	331.463		0.0698149	0.415384		0.0862984	0.484763	0.428571	0.176835	0.171393		51.7082	301.693	0.822064
										60	150	401.44	61.76	258.62	0	2.05867	0.316718	1.32626	0	26.9906	67.4764	355.139		0.0665946	0.435471		0.0862984	0.495431	0.4	0.176835	0.192516		55.4017	287.777	0.74097
										80	80				0	0	0	0	0	35.9874	35.9874	189.407		0.101861	0.284701		0.115064	0.404159	1	0.23578	0.0671266		29.5476	440.176	2.07757
										80	90	1015.18	23.16	285.64	0	5.20605	0.118769	1.46482	0	35.9874	40.4858	213.083		0.0941579	0.307993		0.115064	0.420293	0.888889	0.23578	0.0816959		33.241	406.887	1.74105
										80	100	227.74	23.16	281.78	0	1.1679	0.118769	1.44503	0	35.9874	44.9843	236.759		0.087725	0.330578		0.115064	0.435088	0.8	0.23578	0.0974296		36.9344	379.089	1.4863
										80	120				0	0	0	0	0	35.9874	53.9811	284.111		0.0775473	0.373965		0.115064	0.461532	0.666667	0.23578	0.13226		44.3213	335.108	1.13007
										80	140	590.58	50.18	270.2	0	3.02862	0.257333	1.38564	0	35.9874	62.978	331.463		0.0698149	0.415384		0.115064	0.484763	0.571429	0.23578	0.171393		51.7082	301.693	0.896164
										80	150				0	0	0	0	0	35.9874	67.4764	355.139		0.0665946	0.435471		0.115064	0.495431	0.533333	0.23578	0.192516		55.4017	287.777	0.80776
										100	100				0	0	0	0	0	44.9843	44.9843	236.759		0.087725	0.330578		0.143831	0.435088	1	0.294724	0.0974296		36.9344	379.089	1.5892
										100	120				0	0	0	0	0	44.9843	53.9811	284.111		0.0775473	0.373965		0.143831	0.461532	0.833333	0.294724	0.13226		44.3213	335.108	1.20831
										100	140				0	0	0	0	0	44.9843	62.978	331.463		0.0698149	0.415384		0.143831	0.484763	0.714286	0.294724	0.171393		51.7082	301.693	0.958209
										100	150				0	0	0	0	0	44.9843	67.4764	355.139		0.0665946	0.435471		0.143831	0.495431	0.666667	0.294724	0.192516		55.4017	287.777	0.863685

## Sheet: Span0pt3
	Rheology
	Shear Rate	Shear Stress	Viscosity	Temperature	Torque	Status
								Etching Depth [um]	Width [um]	Qd [ul/min]	Qc [ul/min]	L [um]	L_SD [um]	H [um]	H_SD [um]	L/Width	L/width_SD	H/width	H/width_SD	U_d [mm/s]	U_c [mm/s]	Shear Rate_c [1/s]	Eta_d [Pa*s]	Eta_c [Pa*s]	Alpha=eta_d/eta_c	Interfacial Tension [mN*m]	Ca_d	Ca_c	q=Qd/Qc	Re_d	Re_c	Lambda_s	Wi_c	El_d	Ca_c^(-0.5)*alpha^(-0.6)*Re_c^(-0.2)*q^0.3*Wi^(-0.3)
	[1/s]	[Pa]	[Pa·s]	[°C]	[µN·m]			190	195	5	10	417.984	18.265	338.916	0	2.14351	0.0936665	1.73803	0	2.24921	4.49843	23.6759	0.029	0.358353	0.0809257	4.51	0.0144628	0.357434	0.5	0.0147362	0.00238508	0.156	3.69344	1548.56	13.8839
	500	27.779	0.055537							5	20	318.622	20.2944	296.298	0	1.63396	0.104074	1.51948	0	2.24921	8.99685	47.3518		0.244033	0.118836		0.0144628	0.486813	0.25	0.0147362	0.0070048		7.38689	1054.55	5.02474
	396	25.696	0.064833							5	30	233.386	12.1766	225.268	0	1.19685	0.0624443	1.15522	0	2.24921	13.4953	71.0278		0.191293	0.1516		0.0144628	0.572407	0.166667	0.0147362	0.0134041		11.0803	826.641	2.75721
	315	23.775	0.075512							5	40	186.708	6.08832	172.502	0	0.957479	0.0312222	0.884628	0	2.24921	17.9937	94.7037		0.159857	0.181412		0.0144628	0.637786	0.125	0.0147362	0.0213867		14.7738	690.794	1.79746
	250	21.914	0.087613							5	50	174.532	6.08832	164.385	0	0.895035	0.0312222	0.842998	0	2.24921	22.4921	118.38		0.138619	0.209207		0.0144628	0.691316	0.1	0.0147362	0.0308292		18.4672	599.018	1.28856
	199	20.221	0.10177							5	60	166.414	6.08832	158.296	0	0.853406	0.0312222	0.811776	0	2.24921	26.9906	142.056		0.123146	0.235492		0.0144628	0.736983	0.0833333	0.0147362	0.0416431		22.1607	532.157	0.981178
	158	18.622	0.11797							5	70	148.149	8.11776	140.031	0	0.759739	0.0416295	0.71811	0	2.24921	31.489	165.731		0.111288	0.260585		0.0144628	0.777017	0.0714286	0.0147362	0.0537605		25.8541	480.912	0.778978
	125	17.118	0.13651							5	80	144.09	4.05888	135.972	0	0.738924	0.0208148	0.697295	0	2.24921	35.9874	189.407		0.101861	0.284701		0.0144628	0.812799	0.0625	0.0147362	0.0671266		29.5476	440.176	0.637681
	99.6	15.702	0.15763							5	90	142.061	4.05888	135.972	0	0.728517	0.0208148	0.697295	0	2.24921	40.4858	213.083		0.0941579	0.307993		0.0144628	0.845246	0.0555556	0.0147362	0.0816959		33.241	406.887	0.534392
	79.1	14.348	0.1813							5	100	144.09	4.05888	135.972	0	0.738924	0.0208148	0.697295	0	2.24921	44.9843	236.759		0.087725	0.330578		0.0144628	0.874999	0.05	0.0147362	0.0974296		36.9344	379.089	0.4562
	62.9	13.083	0.20809							5	120	135.972	8.11776	121.766	0	0.697295	0.0416295	0.624443	0	2.24921	53.9811	284.111		0.0775473	0.373965		0.0144628	0.92818	0.0416667	0.0147362	0.13226		44.3213	335.108	0.346859
	49.9	11.887	0.23799							5	140	125.825	6.08832	115.678	0	0.645258	0.0312222	0.593221	0	2.24921	62.978	331.463		0.0698149	0.415384		0.0144628	0.9749	0.0357143	0.0147362	0.171393		51.7082	301.693	0.275065
	39.7	10.754	0.27102							5	150	123.796	4.05888	111.619	0	0.63485	0.0208148	0.572406	0	2.24921	67.4764	355.139		0.0665946	0.435471		0.0144628	0.996355	0.0333333	0.0147362	0.192516		55.4017	287.777	0.247931
	31.5	9.6856	0.30728							10	10				0	0	0	0	0	4.49843	4.49843	23.6759		0.358353	0.0809257		0.0289256	0.357434	1	0.0294724	0.00238508		3.69344	1548.56	17.0931
	25	8.6865	0.3469							10	20	393.711	8.11776	290.21	0	2.01903	0.0416295	1.48826	0	4.49843	8.99685	47.3518		0.244033	0.118836		0.0289256	0.486813	0.5	0.0294724	0.0070048		7.38689	1054.55	6.18618
	19.9	7.7544	0.38981							10	30	265.857	20.2944	223.238	0	1.36337	0.104074	1.14481	0	4.49843	13.4953	71.0278		0.191293	0.1516		0.0289256	0.572407	0.333333	0.0294724	0.0134041		11.0803	826.641	3.39453
	15.8	6.8825	0.4355							10	40	223.238	16.2355	211.062	0	1.14481	0.0832591	1.08237	0	4.49843	17.9937	94.7037		0.159857	0.181412		0.0289256	0.637786	0.25	0.0294724	0.0213867		14.7738	690.794	2.21293
	12.6	6.0773	0.48411							10	50	215.121	10.1472	200.915	0	1.10318	0.0520369	1.03033	0	4.49843	22.4921	118.38		0.138619	0.209207		0.0289256	0.691316	0.2	0.0294724	0.0308292		18.4672	599.018	1.5864
	9.97	5.3336	0.53481							10	60	211.062	10.1472	186.708	0	1.08237	0.0520369	0.957479	0	4.49843	26.9906	142.056		0.123146	0.235492		0.0289256	0.736983	0.166667	0.0294724	0.0416431		22.1607	532.157	1.20797
	7.92	4.6517	0.58717							10	70	190.767	12.1766	168.444	0	0.978294	0.0624443	0.863813	0	4.49843	31.489	165.731		0.111288	0.260585		0.0289256	0.777017	0.142857	0.0294724	0.0537605		25.8541	480.912	0.959034
	6.29	4.032	0.64069							10	80	178.591	8.11776	164.385	0	0.91585	0.0416295	0.842998	0	4.49843	35.9874	189.407		0.101861	0.284701		0.0289256	0.812799	0.125	0.0294724	0.0671266		29.5476	440.176	0.785078
	5	3.4736	0.69481							10	90	172.502	6.08832	158.296	0	0.884628	0.0312222	0.811776	0	4.49843	40.4858	213.083		0.0941579	0.307993		0.0289256	0.845246	0.111111	0.0294724	0.0816959		33.241	406.887	0.657913
	3.97	2.9729	0.7486							10	100	168.444	8.11776	154.237	0	0.863813	0.0416295	0.790961	0	4.49843	44.9843	236.759		0.087725	0.330578		0.0289256	0.874999	0.1	0.0294724	0.0974296		36.9344	379.089	0.561648
	3.15	2.5258	0.80066							10	120	164.385	6.08832	150.179	0	0.842998	0.0312222	0.770146	0	4.49843	53.9811	284.111		0.0775473	0.373965		0.0289256	0.92818	0.0833333	0.0294724	0.13226		44.3213	335.108	0.427033
	2.51	2.1188	0.84555							10	140	152.208	6.08832	135.972	0	0.780554	0.0312222	0.697295	0	4.49843	62.978	331.463		0.0698149	0.415384		0.0289256	0.9749	0.0714286	0.0294724	0.171393		51.7082	301.693	0.338645
	1.99	1.7752	0.89182							10	150	144.09	6.08832	131.914	0	0.738924	0.0312222	0.67648	0	4.49843	67.4764	355.139		0.0665946	0.435471		0.0289256	0.996355	0.0666667	0.0294724	0.192516		55.4017	287.777	0.305239
	1.58	1.4801	0.93595							20	20				0	0	0	0	0	8.99685	8.99685	47.3518		0.244033	0.118836		0.0578511	0.486813	1	0.0589449	0.0070048		7.38689	1054.55	7.61608
	1.26	1.2312	0.98027							20	30				0	0	0	0	0	8.99685	13.4953	71.0278		0.191293	0.1516		0.0578511	0.572407	0.666667	0.0589449	0.0134041		11.0803	826.641	4.17915
	0.998	1.0182	1.0205							20	40				0	0	0	0	0	8.99685	17.9937	94.7037		0.159857	0.181412		0.0578511	0.637786	0.5	0.0589449	0.0213867		14.7738	690.794	2.72444
	0.793	0.83772	1.0569							20	50				0	0	0	0	0	8.99685	22.4921	118.38		0.138619	0.209207		0.0578511	0.691316	0.4	0.0589449	0.0308292		18.4672	599.018	1.95309
	0.63	0.68287	1.0847							20	60				0	0	0	0	0	8.99685	26.9906	142.056		0.123146	0.235492		0.0578511	0.736983	0.333333	0.0589449	0.0416431		22.1607	532.157	1.48719
	0.5	0.55694	1.1139							20	70				0	0	0	0	0	8.99685	31.489	165.731		0.111288	0.260585		0.0578511	0.777017	0.285714	0.0589449	0.0537605		25.8541	480.912	1.18071
	0.397	0.45021	1.1332							20	80				0	0	0	0	0	8.99685	35.9874	189.407		0.101861	0.284701		0.0578511	0.812799	0.25	0.0589449	0.0671266		29.5476	440.176	0.966544
	0.316	0.36463	1.1534							20	90				0	0	0	0	0	8.99685	40.4858	213.083		0.0941579	0.307993		0.0578511	0.845246	0.222222	0.0589449	0.0816959		33.241	406.887	0.809986
	0.251	0.29397	1.1706							20	100	285.64	42.46	169.84	0	1.46482	0.217744	0.870974	0	8.99685	44.9843	236.759		0.087725	0.330578		0.0578511	0.874999	0.2	0.0589449	0.0974296		36.9344	379.089	0.691469
	0.199	0.23684	1.1874							20	120	270.2	42.46	154.4	0	1.38564	0.217744	0.791795	0	8.99685	53.9811	284.111		0.0775473	0.373965		0.0578511	0.92818	0.166667	0.0589449	0.13226		44.3213	335.108	0.525739
	0.158	0.18875	1.192							20	140	254.76	38.6	146.68	0	1.30646	0.197949	0.752205	0	8.99685	62.978	331.463		0.0698149	0.415384		0.0578511	0.9749	0.142857	0.0589449	0.171393		51.7082	301.693	0.416921
	0.126	0.15092	1.2							20	150				0	0	0	0	0	8.99685	67.4764	355.139		0.0665946	0.435471		0.0578511	0.996355	0.133333	0.0589449	0.192516		55.4017	287.777	0.375793
	0.1	0.12295	1.2301							40	40				0	0	0	0	0	17.9937	17.9937	94.7037		0.159857	0.181412		0.115702	0.637786	1	0.11789	0.0213867		14.7738	690.794	3.35418
	0.0794	0.098146	1.2357							40	50				0	0	0	0	0	17.9937	22.4921	118.38		0.138619	0.209207		0.115702	0.691316	0.8	0.11789	0.0308292		18.4672	599.018	2.40453
	0.063	0.076415	1.2132							40	60				0	0	0	0	0	17.9937	26.9906	142.056		0.123146	0.235492		0.115702	0.736983	0.666667	0.11789	0.0416431		22.1607	532.157	1.83094
	0.0501	0.062041	1.2381							40	70				0	0	0	0	0	17.9937	31.489	165.731		0.111288	0.260585		0.115702	0.777017	0.571429	0.11789	0.0537605		25.8541	480.912	1.45362
										40	80				0	0	0	0	0	17.9937	35.9874	189.407		0.101861	0.284701		0.115702	0.812799	0.5	0.11789	0.0671266		29.5476	440.176	1.18996
										40	90				0	0	0	0	0	17.9937	40.4858	213.083		0.0941579	0.307993		0.115702	0.845246	0.444444	0.11789	0.0816959		33.241	406.887	0.99721
										40	100				0	0	0	0	0	17.9937	44.9843	236.759		0.087725	0.330578		0.115702	0.874999	0.4	0.11789	0.0974296		36.9344	379.089	0.851299
	Cross Model Viscosity									40	120				0	0	0	0	0	17.9937	53.9811	284.111		0.0775473	0.373965		0.115702	0.92818	0.333333	0.11789	0.13226		44.3213	335.108	0.647261
	\eta=1.28/(1+(0.156*x)^0.723)									40	140				0	0	0	0	0	17.9937	62.978	331.463		0.0698149	0.415384		0.115702	0.9749	0.285714	0.11789	0.171393		51.7082	301.693	0.51329
										40	150				0	0	0	0	0	17.9937	67.4764	355.139		0.0665946	0.435471		0.115702	0.996355	0.266667	0.11789	0.192516		55.4017	287.777	0.462656
										60	60				0	0	0	0	0	26.9906	26.9906	142.056		0.123146	0.235492		0.173553	0.736983	1	0.176835	0.0416431		22.1607	532.157	2.06777
										60	70				0	0	0	0	0	26.9906	31.489	165.731		0.111288	0.260585		0.173553	0.777017	0.857143	0.176835	0.0537605		25.8541	480.912	1.64165
										60	80				0	0	0	0	0	26.9906	35.9874	189.407		0.101861	0.284701		0.173553	0.812799	0.75	0.176835	0.0671266		29.5476	440.176	1.34387
										60	90				0	0	0	0	0	26.9906	40.4858	213.083		0.0941579	0.307993		0.173553	0.845246	0.666667	0.176835	0.0816959		33.241	406.887	1.1262
										60	100				0	0	0	0	0	26.9906	44.9843	236.759		0.087725	0.330578		0.173553	0.874999	0.6	0.176835	0.0974296		36.9344	379.089	0.961412
										60	120				0	0	0	0	0	26.9906	53.9811	284.111		0.0775473	0.373965		0.173553	0.92818	0.5	0.176835	0.13226		44.3213	335.108	0.730982
										60	140				0	0	0	0	0	26.9906	62.978	331.463		0.0698149	0.415384		0.173553	0.9749	0.428571	0.176835	0.171393		51.7082	301.693	0.579683
										60	150				0	0	0	0	0	26.9906	67.4764	355.139		0.0665946	0.435471		0.173553	0.996355	0.4	0.176835	0.192516		55.4017	287.777	0.522499
										80	80				0	0	0	0	0	35.9874	35.9874	189.407		0.101861	0.284701		0.231405	0.812799	1	0.23578	0.0671266		29.5476	440.176	1.46501
										80	90				0	0	0	0	0	35.9874	40.4858	213.083		0.0941579	0.307993		0.231405	0.845246	0.888889	0.23578	0.0816959		33.241	406.887	1.22771
										80	100				0	0	0	0	0	35.9874	44.9843	236.759		0.087725	0.330578		0.231405	0.874999	0.8	0.23578	0.0974296		36.9344	379.089	1.04807
										80	120				0	0	0	0	0	35.9874	53.9811	284.111		0.0775473	0.373965		0.231405	0.92818	0.666667	0.23578	0.13226		44.3213	335.108	0.796872
										80	140				0	0	0	0	0	35.9874	62.978	331.463		0.0698149	0.415384		0.231405	0.9749	0.571429	0.23578	0.171393		51.7082	301.693	0.631934
										80	150				0	0	0	0	0	35.9874	67.4764	355.139		0.0665946	0.435471		0.231405	0.996355	0.533333	0.23578	0.192516		55.4017	287.777	0.569596
										100	100				0	0	0	0	0	44.9843	44.9843	236.759		0.087725	0.330578		0.289256	0.874999	1	0.294724	0.0974296		36.9344	379.089	1.12063
										100	120				0	0	0	0	0	44.9843	53.9811	284.111		0.0775473	0.373965		0.289256	0.92818	0.833333	0.294724	0.13226		44.3213	335.108	0.852043
										100	140				0	0	0	0	0	44.9843	62.978	331.463		0.0698149	0.415384		0.289256	0.9749	0.714286	0.294724	0.171393		51.7082	301.693	0.675686
										100	150				0	0	0	0	0	44.9843	67.4764	355.139		0.0665946	0.435471		0.289256	0.996355	0.666667	0.294724	0.192516		55.4017	287.777	0.609032

## Sheet: Span1
	Rheology
	Shear Rate	Shear Stress	Viscosity	Temperature	Torque	Status
								Etching Depth [um]	Width [um]	Qd [ul/min]	Qc [ul/min]	L [um]	L_SD [um]	H [um]	H_SD [um]	L/Width	L/width_SD	H/width	H/width_SD	U_d [mm/s]	U_c [mm/s]	Shear Rate_c [1/s]	Eta_d [Pa*s]	Eta_c [Pa*s]	Alpha=eta_d/eta_c	Interfacial Tension [mN*m]	Ca_d	Ca_c	q=Qd/Qc	Re_d	Re_c	Lambda_s	Wi_c	El_d	Ca_c^(-0.5)*alpha^(-0.6)*Re_c^(-0.2)*q^0.3*Wi^(-0.3)
	[1/s]	[Pa]	[Pa·s]	[°C]	[µN·m]			190	195	5	10	243.734	21.504	180.499	0	1.24992	0.110277	0.925637	0	2.24921	4.49843	23.6759	0.029	0.358353	0.0809257	3.91	0.0166821	0.412283	0.5	0.0147362	0.00238508	0.156	3.69344	1548.56	12.9274
	500	27.779	0.055537							5	20	162.006	18.816	150.004	0	0.830799	0.0964923	0.76925	0	2.24921	8.99685	47.3518		0.244033	0.118836		0.0166821	0.561516	0.25	0.0147362	0.0070048		7.38689	1054.55	4.67857
	396	25.696	0.064833							5	30	143.768	8.064	131.04	0	0.73727	0.0413538	0.672	0	2.24921	13.4953	71.0278		0.191293	0.1516		0.0166821	0.660244	0.166667	0.0147362	0.0134041		11.0803	826.641	2.56726
	315	23.775	0.075512							5	40	134.252	6.72	131.994	0	0.688473	0.0344615	0.676894	0	2.24921	17.9937	94.7037		0.159857	0.181412		0.0166821	0.735656	0.125	0.0147362	0.0213867		14.7738	690.794	1.67363
	250	21.914	0.087613							5	50	121.672	10.752	114.697	0	0.623961	0.0551385	0.58819	0	2.24921	22.4921	118.38		0.138619	0.209207		0.0166821	0.7974	0.1	0.0147362	0.0308292		18.4672	599.018	1.19979
	199	20.221	0.10177							5	60	116.35	6.72	106.7	0	0.596667	0.0344615	0.54718	0	2.24921	26.9906	142.056		0.123146	0.235492		0.0166821	0.850075	0.0833333	0.0147362	0.0416431		22.1607	532.157	0.913583
	158	18.622	0.11797							5	70	112.264	5.376	99.8323	0	0.575714	0.0275692	0.511961	0	2.24921	31.489	165.731		0.111288	0.260585		0.0166821	0.896253	0.0714286	0.0147362	0.0537605		25.8541	480.912	0.725312
	125	17.118	0.13651							5	80	100.706	8.064	93.0182	0	0.516441	0.0413538	0.477017	0	2.24921	35.9874	189.407		0.101861	0.284701		0.0166821	0.937526	0.0625	0.0147362	0.0671266		29.5476	440.176	0.59375
	99.6	15.702	0.15763							5	90	101.62	4.032	92.736	0	0.521127	0.0206769	0.475569	0	2.24921	40.4858	213.083		0.0941579	0.307993		0.0166821	0.974951	0.0555556	0.0147362	0.0816959		33.241	406.887	0.497576
	79.1	14.348	0.1813							5	100	98.3002	3.36	88.825	0	0.504103	0.0172308	0.455513	0	2.24921	44.9843	236.759		0.087725	0.330578		0.0166821	1.00927	0.05	0.0147362	0.0974296		36.9344	379.089	0.424771
	62.9	13.083	0.20809							5	120	90.048	4.032	83.328	0	0.461785	0.0206769	0.427323	0	2.24921	53.9811	284.111		0.0775473	0.373965		0.0166821	1.07061	0.0416667	0.0147362	0.13226		44.3213	335.108	0.322963
	49.9	11.887	0.23799							5	140	79.296	3.36	76.608	0	0.406646	0.0172308	0.392862	0	2.24921	62.978	331.463		0.0698149	0.415384		0.0166821	1.1245	0.0357143	0.0147362	0.171393		51.7082	301.693	0.256116
	39.7	10.754	0.27102							5	150	75.264	4.032	71.232	0	0.385969	0.0206769	0.365292	0	2.24921	67.4764	355.139		0.0665946	0.435471		0.0166821	1.14925	0.0333333	0.0147362	0.192516		55.4017	287.777	0.230851
	31.5	9.6856	0.30728							10	10				0	0	0	0	0	4.49843	4.49843	23.6759		0.358353	0.0809257		0.0333643	0.412283	1	0.0294724	0.00238508		3.69344	1548.56	15.9155
	25	8.6865	0.3469							10	20	327.936	51.072	192.192	0	1.68172	0.261908	0.9856	0	4.49843	8.99685	47.3518		0.244033	0.118836		0.0333643	0.561516	0.5	0.0294724	0.0070048		7.38689	1054.55	5.76
	19.9	7.7544	0.38981							10	30	206.976	32.256	181.44	0	1.06142	0.165415	0.930462	0	4.49843	13.4953	71.0278		0.191293	0.1516		0.0333643	0.660244	0.333333	0.0294724	0.0134041		11.0803	826.641	3.16067
	15.8	6.8825	0.4355							10	40	162.624	38.976	161.28	0	0.833969	0.199877	0.827077	0	4.49843	17.9937	94.7037		0.159857	0.181412		0.0333643	0.735656	0.25	0.0294724	0.0213867		14.7738	690.794	2.06048
	12.6	6.0773	0.48411							10	50	180.096	29.568	162.624	0	0.923569	0.151631	0.833969	0	4.49843	22.4921	118.38		0.138619	0.209207		0.0333643	0.7974	0.2	0.0294724	0.0308292		18.4672	599.018	1.47711
	9.97	5.3336	0.53481							10	60	147.84	24.192	131.712	0	0.758154	0.124062	0.675446	0	4.49843	26.9906	142.056		0.123146	0.235492		0.0333643	0.850075	0.166667	0.0294724	0.0416431		22.1607	532.157	1.12475
	7.92	4.6517	0.58717							10	70	137.088	28.224	123.648	0	0.703015	0.144738	0.634092	0	4.49843	31.489	165.731		0.111288	0.260585		0.0333643	0.896253	0.142857	0.0294724	0.0537605		25.8541	480.912	0.892964
	6.29	4.032	0.64069							10	80	120.96	21.504	108.864	0	0.620308	0.110277	0.558277	0	4.49843	35.9874	189.407		0.101861	0.284701		0.0333643	0.937526	0.125	0.0294724	0.0671266		29.5476	440.176	0.730992
	5	3.4736	0.69481							10	90	114.24	18.816	102.144	0	0.585846	0.0964923	0.523815	0	4.49843	40.4858	213.083		0.0941579	0.307993		0.0333643	0.974951	0.111111	0.0294724	0.0816959		33.241	406.887	0.612588
	3.97	2.9729	0.7486							10	100	111.552	13.44	100.8	0	0.572062	0.0689231	0.516923	0	4.49843	44.9843	236.759		0.087725	0.330578		0.0333643	1.00927	0.1	0.0294724	0.0974296		36.9344	379.089	0.522955
	3.15	2.5258	0.80066							10	120	102.144	12.096	95.424	0	0.523815	0.0620308	0.489354	0	4.49843	53.9811	284.111		0.0775473	0.373965		0.0333643	1.07061	0.0833333	0.0294724	0.13226		44.3213	335.108	0.397614
	2.51	2.1188	0.84555							10	140	96.768	8.064	90.048	0	0.496246	0.0413538	0.461785	0	4.49843	62.978	331.463		0.0698149	0.415384		0.0333643	1.1245	0.0714286	0.0294724	0.171393		51.7082	301.693	0.315315
	1.99	1.7752	0.89182							10	150	92.736	8.064	87.36	0	0.475569	0.0413538	0.448	0	4.49843	67.4764	355.139		0.0665946	0.435471		0.0333643	1.14925	0.0666667	0.0294724	0.192516		55.4017	287.777	0.28421
	1.58	1.4801	0.93595							20	20				0	0	0	0	0	8.99685	8.99685	47.3518		0.244033	0.118836		0.0667286	0.561516	1	0.0589449	0.0070048		7.38689	1054.55	7.09139
	1.26	1.2312	0.98027							20	30				0	0	0	0	0	8.99685	13.4953	71.0278		0.191293	0.1516		0.0667286	0.660244	0.666667	0.0589449	0.0134041		11.0803	826.641	3.89124
	0.998	1.0182	1.0205							20	40				0	0	0	0	0	8.99685	17.9937	94.7037		0.159857	0.181412		0.0667286	0.735656	0.5	0.0589449	0.0213867		14.7738	690.794	2.53675
	0.793	0.83772	1.0569							20	50	382.14	61.76	243.18	0	1.95969	0.316718	1.24708	0	8.99685	22.4921	118.38		0.138619	0.209207		0.0667286	0.7974	0.4	0.0589449	0.0308292		18.4672	599.018	1.81854
	0.63	0.68287	1.0847							20	60	324.24	15.44	212.3	0	1.66277	0.0791795	1.08872	0	8.99685	26.9906	142.056		0.123146	0.235492		0.0667286	0.850075	0.333333	0.0589449	0.0416431		22.1607	532.157	1.38473
	0.5	0.55694	1.1139							20	70				0	0	0	0	0	8.99685	31.489	165.731		0.111288	0.260585		0.0667286	0.896253	0.285714	0.0589449	0.0537605		25.8541	480.912	1.09937
	0.397	0.45021	1.1332							20	80	285.64	23.16	193	0	1.46482	0.118769	0.989744	0	8.99685	35.9874	189.407		0.101861	0.284701		0.0667286	0.937526	0.25	0.0589449	0.0671266		29.5476	440.176	0.899957
	0.316	0.36463	1.1534							20	90	250.9	57.9	177.56	0	1.28667	0.296923	0.910564	0	8.99685	40.4858	213.083		0.0941579	0.307993		0.0667286	0.974951	0.222222	0.0589449	0.0816959		33.241	406.887	0.754185
	0.251	0.29397	1.1706							20	100	220.02	23.16	169.84	0	1.12831	0.118769	0.870974	0	8.99685	44.9843	236.759		0.087725	0.330578		0.0667286	1.00927	0.2	0.0589449	0.0974296		36.9344	379.089	0.643833
	0.199	0.23684	1.1874							20	120	223.88	30.88	162.12	0	1.1481	0.158359	0.831385	0	8.99685	53.9811	284.111		0.0775473	0.373965		0.0667286	1.07061	0.166667	0.0589449	0.13226		44.3213	335.108	0.48952
	0.158	0.18875	1.192							20	140	200.72	19.3	162.12	0	1.02933	0.0989744	0.831385	0	8.99685	62.978	331.463		0.0698149	0.415384		0.0667286	1.1245	0.142857	0.0589449	0.171393		51.7082	301.693	0.388199
	0.126	0.15092	1.2							20	150	173.7	7.72	154.4	0	0.890769	0.0395897	0.791795	0	8.99685	67.4764	355.139		0.0665946	0.435471		0.0667286	1.14925	0.133333	0.0589449	0.192516		55.4017	287.777	0.349904
	0.1	0.12295	1.2301							40	40				0	0	0	0	0	17.9937	17.9937	94.7037		0.159857	0.181412		0.133457	0.735656	1	0.11789	0.0213867		14.7738	690.794	3.1231
	0.0794	0.098146	1.2357							40	50				0	0	0	0	0	17.9937	22.4921	118.38		0.138619	0.209207		0.133457	0.7974	0.8	0.11789	0.0308292		18.4672	599.018	2.23888
	0.063	0.076415	1.2132							40	60				0	0	0	0	0	17.9937	26.9906	142.056		0.123146	0.235492		0.133457	0.850075	0.666667	0.11789	0.0416431		22.1607	532.157	1.70481
	0.0501	0.062041	1.2381							40	70				0	0	0	0	0	17.9937	31.489	165.731		0.111288	0.260585		0.133457	0.896253	0.571429	0.11789	0.0537605		25.8541	480.912	1.35348
										40	80				0	0	0	0	0	17.9937	35.9874	189.407		0.101861	0.284701		0.133457	0.937526	0.5	0.11789	0.0671266		29.5476	440.176	1.10798
										40	90				0	0	0	0	0	17.9937	40.4858	213.083		0.0941579	0.307993		0.133457	0.974951	0.444444	0.11789	0.0816959		33.241	406.887	0.92851
										40	100				0	0	0	0	0	17.9937	44.9843	236.759		0.087725	0.330578		0.133457	1.00927	0.4	0.11789	0.0974296		36.9344	379.089	0.792651
	Cross Model Viscosity									40	120				0	0	0	0	0	17.9937	53.9811	284.111		0.0775473	0.373965		0.133457	1.07061	0.333333	0.11789	0.13226		44.3213	335.108	0.60267
	\eta=1.28/(1+(0.156*x)^0.723)									40	140				0	0	0	0	0	17.9937	62.978	331.463		0.0698149	0.415384		0.133457	1.1245	0.285714	0.11789	0.171393		51.7082	301.693	0.477929
										40	150				0	0	0	0	0	17.9937	67.4764	355.139		0.0665946	0.435471		0.133457	1.14925	0.266667	0.11789	0.192516		55.4017	287.777	0.430783
										60	60				0	0	0	0	0	26.9906	26.9906	142.056		0.123146	0.235492		0.200186	0.850075	1	0.176835	0.0416431		22.1607	532.157	1.92532
										60	70				0	0	0	0	0	26.9906	31.489	165.731		0.111288	0.260585		0.200186	0.896253	0.857143	0.176835	0.0537605		25.8541	480.912	1.52855
										60	80				0	0	0	0	0	26.9906	35.9874	189.407		0.101861	0.284701		0.200186	0.937526	0.75	0.176835	0.0671266		29.5476	440.176	1.25129
										60	90				0	0	0	0	0	26.9906	40.4858	213.083		0.0941579	0.307993		0.200186	0.974951	0.666667	0.176835	0.0816959		33.241	406.887	1.04861
										60	100				0	0	0	0	0	26.9906	44.9843	236.759		0.087725	0.330578		0.200186	1.00927	0.6	0.176835	0.0974296		36.9344	379.089	0.895178
										60	120				0	0	0	0	0	26.9906	53.9811	284.111		0.0775473	0.373965		0.200186	1.07061	0.5	0.176835	0.13226		44.3213	335.108	0.680623
										60	140				0	0	0	0	0	26.9906	62.978	331.463		0.0698149	0.415384		0.200186	1.1245	0.428571	0.176835	0.171393		51.7082	301.693	0.539747
										60	150				0	0	0	0	0	26.9906	67.4764	355.139		0.0665946	0.435471		0.200186	1.14925	0.4	0.176835	0.192516		55.4017	287.777	0.486503
										80	80				0	0	0	0	0	35.9874	35.9874	189.407		0.101861	0.284701		0.266914	0.937526	1	0.23578	0.0671266		29.5476	440.176	1.36408
										80	90				0	0	0	0	0	35.9874	40.4858	213.083		0.0941579	0.307993		0.266914	0.974951	0.888889	0.23578	0.0816959		33.241	406.887	1.14313
										80	100				0	0	0	0	0	35.9874	44.9843	236.759		0.087725	0.330578		0.266914	1.00927	0.8	0.23578	0.0974296		36.9344	379.089	0.975868
										80	120				0	0	0	0	0	35.9874	53.9811	284.111		0.0775473	0.373965		0.266914	1.07061	0.666667	0.23578	0.13226		44.3213	335.108	0.741974
										80	140				0	0	0	0	0	35.9874	62.978	331.463		0.0698149	0.415384		0.266914	1.1245	0.571429	0.23578	0.171393		51.7082	301.693	0.588399
										80	150				0	0	0	0	0	35.9874	67.4764	355.139		0.0665946	0.435471		0.266914	1.14925	0.533333	0.23578	0.192516		55.4017	287.777	0.530355
										100	100				0	0	0	0	0	44.9843	44.9843	236.759		0.087725	0.330578		0.333643	1.00927	1	0.294724	0.0974296		36.9344	379.089	1.04343
										100	120				0	0	0	0	0	44.9843	53.9811	284.111		0.0775473	0.373965		0.333643	1.07061	0.833333	0.294724	0.13226		44.3213	335.108	0.793344
										100	140				0	0	0	0	0	44.9843	62.978	331.463		0.0698149	0.415384		0.333643	1.1245	0.714286	0.294724	0.171393		51.7082	301.693	0.629137
										100	150				0	0	0	0	0	44.9843	67.4764	355.139		0.0665946	0.435471		0.333643	1.14925	0.666667	0.294724	0.192516		55.4017	287.777	0.567074

## Sheet: Tween 0pt03
	Rheology
	Shear Rate	Shear Stress	Viscosity	Temperature	Torque	Status
								Etching Depth [um]	Width [um]	Qd [ul/min]	Qc [ul/min]	L [um]	L_SD [um]	H [um]	H_SD [um]	L/Width	L/width_SD	H/width	H/width_SD	U_d [mm/s]	U_c [mm/s]	Shear Rate_c [1/s]	Eta_d [Pa*s]	Eta_c [Pa*s]	Alpha=eta_d/eta_c	Interfacial Tension [mN*m]	Ca_d	Ca_c	q=Qd/Qc	Re_d	Re_c	Lambda_s	Wi_c	El_d	Ca_c^(-0.5)*alpha^(-0.6)*Re_c^(-0.2)*q^0.3*Wi^(-0.3)
	[1/s]	[Pa]	[Pa·s]	[°C]	[µN·m]			190	195	5	10	506.688	34.944	389.76	0	2.5984	0.1792	1.99877	0	2.24921	4.49843	23.6759	0.029	0.358353	0.0809257	6.94	0.00939873	0.23228	0.5	0.0147362	0.00238508	0.156	3.69344	1548.56	17.2228
	500	27.779	0.055537							5	20	376.32	29.568	314.496	0	1.92985	0.151631	1.6128	0	2.24921	8.99685	47.3518		0.244033	0.118836		0.00939873	0.316358	0.25	0.0147362	0.0070048		7.38689	1054.55	6.23311
	396	25.696	0.064833							5	30	264.768	26.88	240.576	0	1.35778	0.137846	1.23372	0	2.24921	13.4953	71.0278		0.191293	0.1516		0.00939873	0.371982	0.166667	0.0147362	0.0134041		11.0803	826.641	3.42028
	315	23.775	0.075512							5	40	197.568	13.44	186.816	0	1.01317	0.0689231	0.958031	0	2.24921	17.9937	94.7037		0.159857	0.181412		0.00939873	0.414469	0.125	0.0147362	0.0213867		14.7738	690.794	2.22972
	250	21.914	0.087613							5	50	182.784	10.752	174.72	0	0.937354	0.0551385	0.896	0	2.24921	22.4921	118.38		0.138619	0.209207		0.00939873	0.449256	0.1	0.0147362	0.0308292		18.4672	599.018	1.59844
	199	20.221	0.10177							5	60	174.72	8.064	162.624	0	0.896	0.0413538	0.833969	0	2.24921	26.9906	142.056		0.123146	0.235492		0.00939873	0.478933	0.0833333	0.0147362	0.0416431		22.1607	532.157	1.21714
	158	18.622	0.11797							5	70	166.656	6.72	155.904	0	0.854646	0.0344615	0.799508	0	2.24921	31.489	165.731		0.111288	0.260585		0.00939873	0.504949	0.0714286	0.0147362	0.0537605		25.8541	480.912	0.96631
	125	17.118	0.13651							5	80	162.624	5.376	151.872	0	0.833969	0.0275692	0.778831	0	2.24921	35.9874	189.407		0.101861	0.284701		0.00939873	0.528202	0.0625	0.0147362	0.0671266		29.5476	440.176	0.791034
	99.6	15.702	0.15763							5	90	154.56	5.376	147.84	0	0.792615	0.0275692	0.758154	0	2.24921	40.4858	213.083		0.0941579	0.307993		0.00939873	0.549288	0.0555556	0.0147362	0.0816959		33.241	406.887	0.662905
	79.1	14.348	0.1813							5	100	151.872	4.032	146.496	0	0.778831	0.0206769	0.751262	0	2.24921	44.9843	236.759		0.087725	0.330578		0.00939873	0.568623	0.05	0.0147362	0.0974296		36.9344	379.089	0.565909
	62.9	13.083	0.20809							5	120	145.152	6.72	134.4	0	0.744369	0.0344615	0.689231	0	2.24921	53.9811	284.111		0.0775473	0.373965		0.00939873	0.603183	0.0416667	0.0147362	0.13226		44.3213	335.108	0.430273
	49.9	11.887	0.23799							5	140	133.056	5.376	130.368	0	0.682338	0.0275692	0.668554	0	2.24921	62.978	331.463		0.0698149	0.415384		0.00939873	0.633545	0.0357143	0.0147362	0.171393		51.7082	301.693	0.341214
	39.7	10.754	0.27102							5	150	127.68	2.688	119.616	0	0.654769	0.0137846	0.613415	0	2.24921	67.4764	355.139		0.0665946	0.435471		0.00939873	0.647487	0.0333333	0.0147362	0.192516		55.4017	287.777	0.307555
	31.5	9.6856	0.30728							10	10	683.841	48.384	389.76	0	3.50688	0.248123	1.99877	0	4.49843	4.49843	23.6759		0.358353	0.0809257		0.0187975	0.23228	1	0.0294724	0.00238508		3.69344	1548.56	21.2037
	25	8.6865	0.3469							10	20	396.48	40.32	377.664	0	2.03323	0.206769	1.93674	0	4.49843	8.99685	47.3518		0.244033	0.118836		0.0187975	0.316358	0.5	0.0294724	0.0070048		7.38689	1054.55	7.67386
	19.9	7.7544	0.38981							10	30	361.536	34.944	284.928	0	1.85403	0.1792	1.46117	0	4.49843	13.4953	71.0278		0.191293	0.1516		0.0187975	0.371982	0.333333	0.0294724	0.0134041		11.0803	826.641	4.21086
	15.8	6.8825	0.4355							10	40	314.496	26.88	275.52	0	1.6128	0.137846	1.41292	0	4.49843	17.9937	94.7037		0.159857	0.181412		0.0187975	0.414469	0.25	0.0294724	0.0213867		14.7738	690.794	2.74511
	12.6	6.0773	0.48411							10	50	272.832	26.88	240.576	0	1.39914	0.137846	1.23372	0	4.49843	22.4921	118.38		0.138619	0.209207		0.0187975	0.449256	0.2	0.0294724	0.0308292		18.4672	599.018	1.9679
	9.97	5.3336	0.53481							10	60	267.456	13.44	229.824	0	1.37157	0.0689231	1.17858	0	4.49843	26.9906	142.056		0.123146	0.235492		0.0187975	0.478933	0.166667	0.0294724	0.0416431		22.1607	532.157	1.49847
	7.92	4.6517	0.58717							10	70	248.64	12.096	220.416	0	1.27508	0.0620308	1.13034	0	4.49843	31.489	165.731		0.111288	0.260585		0.0187975	0.504949	0.142857	0.0294724	0.0537605		25.8541	480.912	1.18967
	6.29	4.032	0.64069							10	80	186.816	21.504	174.72	0	0.958031	0.110277	0.896	0	4.49843	35.9874	189.407		0.101861	0.284701		0.0187975	0.528202	0.125	0.0294724	0.0671266		29.5476	440.176	0.973877
	5	3.4736	0.69481							10	90	174.72	5.376	166.656	0	0.896	0.0275692	0.854646	0	4.49843	40.4858	213.083		0.0941579	0.307993		0.0187975	0.549288	0.111111	0.0294724	0.0816959		33.241	406.887	0.816131
	3.97	2.9729	0.7486							10	100	158.592	6.72	151.872	0	0.813292	0.0344615	0.778831	0	4.49843	44.9843	236.759		0.087725	0.330578		0.0187975	0.568623	0.1	0.0294724	0.0974296		36.9344	379.089	0.696715
	3.15	2.5258	0.80066							10	120	147.84	6.72	139.776	0	0.758154	0.0344615	0.7168	0	4.49843	53.9811	284.111		0.0775473	0.373965		0.0187975	0.603183	0.0833333	0.0294724	0.13226		44.3213	335.108	0.529728
	2.51	2.1188	0.84555							10	140	142.464	5.376	134.4	0	0.730585	0.0275692	0.689231	0	4.49843	62.978	331.463		0.0698149	0.415384		0.0187975	0.633545	0.0714286	0.0294724	0.171393		51.7082	301.693	0.420084
	1.99	1.7752	0.89182							10	150	134.4	4.032	130.368	0	0.689231	0.0206769	0.668554	0	4.49843	67.4764	355.139		0.0665946	0.435471		0.0187975	0.647487	0.0666667	0.0294724	0.192516		55.4017	287.777	0.378644
	1.58	1.4801	0.93595							20	20				0	0	0	0	0	8.99685	8.99685	47.3518		0.244033	0.118836		0.0375949	0.316358	1	0.0589449	0.0070048		7.38689	1054.55	9.44763
	1.26	1.2312	0.98027							20	30	463.2	23.16	347.4	0	2.37538	0.118769	1.78154	0	8.99685	13.4953	71.0278		0.191293	0.1516		0.0375949	0.371982	0.666667	0.0589449	0.0134041		11.0803	826.641	5.18417
	0.998	1.0182	1.0205							20	40	370.56	15.44	304.94	0	1.90031	0.0791795	1.56379	0	8.99685	17.9937	94.7037		0.159857	0.181412		0.0375949	0.414469	0.5	0.0589449	0.0213867		14.7738	690.794	3.37963
	0.793	0.83772	1.0569							20	50	358.98	11.58	301.08	0	1.84092	0.0593846	1.544	0	8.99685	22.4921	118.38		0.138619	0.209207		0.0375949	0.449256	0.4	0.0589449	0.0308292		18.4672	599.018	2.42278
	0.63	0.68287	1.0847							20	60	351.26	11.58	277.92	0	1.80133	0.0593846	1.42523	0	8.99685	26.9906	142.056		0.123146	0.235492		0.0375949	0.478933	0.333333	0.0589449	0.0416431		22.1607	532.157	1.84483
	0.5	0.55694	1.1139							20	70	304.94	7.72	250.9	0	1.56379	0.0395897	1.28667	0	8.99685	31.489	165.731		0.111288	0.260585		0.0375949	0.504949	0.285714	0.0589449	0.0537605		25.8541	480.912	1.46465
	0.397	0.45021	1.1332							20	80	270.2	15.44	223.88	0	1.38564	0.0791795	1.1481	0	8.99685	35.9874	189.407		0.101861	0.284701		0.0375949	0.528202	0.25	0.0589449	0.0671266		29.5476	440.176	1.19898
	0.316	0.36463	1.1534							20	90	262.48	11.58	220.02	0	1.34605	0.0593846	1.12831	0	8.99685	40.4858	213.083		0.0941579	0.307993		0.0375949	0.549288	0.222222	0.0589449	0.0816959		33.241	406.887	1.00478
	0.251	0.29397	1.1706							20	100	231.6	11.58	208.44	0	1.18769	0.0593846	1.06892	0	8.99685	44.9843	236.759		0.087725	0.330578		0.0375949	0.568623	0.2	0.0589449	0.0974296		36.9344	379.089	0.857757
	0.199	0.23684	1.1874							20	120	220.02	3.86	193	0	1.12831	0.0197949	0.989744	0	8.99685	53.9811	284.111		0.0775473	0.373965		0.0375949	0.603183	0.166667	0.0589449	0.13226		44.3213	335.108	0.652172
	0.158	0.18875	1.192							20	140	200.72	7.72	177.56	0	1.02933	0.0395897	0.910564	0	8.99685	62.978	331.463		0.0698149	0.415384		0.0375949	0.633545	0.142857	0.0589449	0.171393		51.7082	301.693	0.517184
	0.126	0.15092	1.2							20	150	185.28	7.72	169.84	0	0.950154	0.0395897	0.870974	0	8.99685	67.4764	355.139		0.0665946	0.435471		0.0375949	0.647487	0.133333	0.0589449	0.192516		55.4017	287.777	0.466166
	0.1	0.12295	1.2301							40	40	602.16	23.16	320.38	0	3.088	0.118769	1.64297	0	17.9937	17.9937	94.7037		0.159857	0.181412		0.0751898	0.414469	1	0.11789	0.0213867		14.7738	690.794	4.16081
	0.0794	0.098146	1.2357							40	50				0	0	0	0	0	17.9937	22.4921	118.38		0.138619	0.209207		0.0751898	0.449256	0.8	0.11789	0.0308292		18.4672	599.018	2.98279
	0.063	0.076415	1.2132							40	60	567.42	38.6	316.52	0	2.90985	0.197949	1.62318	0	17.9937	26.9906	142.056		0.123146	0.235492		0.0751898	0.478933	0.666667	0.11789	0.0416431		22.1607	532.157	2.27126
	0.0501	0.062041	1.2381							40	70	509.52	30.88	297.22	0	2.61292	0.158359	1.52421	0	17.9937	31.489	165.731		0.111288	0.260585		0.0751898	0.504949	0.571429	0.11789	0.0537605		25.8541	480.912	1.8032
										40	80	416.88	19.3	270.2	0	2.13785	0.0989744	1.38564	0	17.9937	35.9874	189.407		0.101861	0.284701		0.0751898	0.528202	0.5	0.11789	0.0671266		29.5476	440.176	1.47612
										40	90	389.86	23.16	270.2	0	1.99928	0.118769	1.38564	0	17.9937	40.4858	213.083		0.0941579	0.307993		0.0751898	0.549288	0.444444	0.11789	0.0816959		33.241	406.887	1.23702
										40	100	378.28	15.44	258.62	0	1.9399	0.0791795	1.32626	0	17.9937	44.9843	236.759		0.087725	0.330578		0.0751898	0.568623	0.4	0.11789	0.0974296		36.9344	379.089	1.05602
	Cross Model Viscosity									40	120	358.98	15.44	243.18	0	1.84092	0.0791795	1.24708	0	17.9937	53.9811	284.111		0.0775473	0.373965		0.0751898	0.603183	0.333333	0.11789	0.13226		44.3213	335.108	0.802917
	\eta=1.28/(1+(0.156*x)^0.723)									40	140	301.08	15.44	227.74	0	1.544	0.0791795	1.1679	0	17.9937	62.978	331.463		0.0698149	0.415384		0.0751898	0.633545	0.285714	0.11789	0.171393		51.7082	301.693	0.636729
										40	150	289.5	15.44	223.88	0	1.48462	0.0791795	1.1481	0	17.9937	67.4764	355.139		0.0665946	0.435471		0.0751898	0.647487	0.266667	0.11789	0.192516		55.4017	287.777	0.573917
										60	60	965	27.02	328.1	0	4.94872	0.138564	1.68256	0	26.9906	26.9906	142.056		0.123146	0.235492		0.112785	0.478933	1	0.176835	0.0416431		22.1607	532.157	2.56504
										60	70	864.64	23.16	328.1	0	4.43405	0.118769	1.68256	0	26.9906	31.489	165.731		0.111288	0.260585		0.112785	0.504949	0.857143	0.176835	0.0537605		25.8541	480.912	2.03644
										60	80	791.3	46.32	293.36	0	4.05795	0.237538	1.50441	0	26.9906	35.9874	189.407		0.101861	0.284701		0.112785	0.528202	0.75	0.176835	0.0671266		29.5476	440.176	1.66705
										60	90	733.4	19.3	281.78	0	3.76103	0.0989744	1.44503	0	26.9906	40.4858	213.083		0.0941579	0.307993		0.112785	0.549288	0.666667	0.176835	0.0816959		33.241	406.887	1.39703
										60	100	532.68	88.78	247.04	0	2.73169	0.455282	1.26687	0	26.9906	44.9843	236.759		0.087725	0.330578		0.112785	0.568623	0.6	0.176835	0.0974296		36.9344	379.089	1.19262
										60	120				0	0	0	0	0	26.9906	53.9811	284.111		0.0775473	0.373965		0.112785	0.603183	0.5	0.176835	0.13226		44.3213	335.108	0.906772
										60	140				0	0	0	0	0	26.9906	62.978	331.463		0.0698149	0.415384		0.112785	0.633545	0.428571	0.176835	0.171393		51.7082	301.693	0.719088
										60	150				0	0	0	0	0	26.9906	67.4764	355.139		0.0665946	0.435471		0.112785	0.647487	0.4	0.176835	0.192516		55.4017	287.777	0.648152
										80	80				0	0	0	0	0	35.9874	35.9874	189.407		0.101861	0.284701		0.15038	0.528202	1	0.23578	0.0671266		29.5476	440.176	1.81732
										80	90				0	0	0	0	0	35.9874	40.4858	213.083		0.0941579	0.307993		0.15038	0.549288	0.888889	0.23578	0.0816959		33.241	406.887	1.52296
										80	100				0	0	0	0	0	35.9874	44.9843	236.759		0.087725	0.330578		0.15038	0.568623	0.8	0.23578	0.0974296		36.9344	379.089	1.30012
										80	120	617.6	23.16	270.2	0	3.16718	0.118769	1.38564	0	35.9874	53.9811	284.111		0.0775473	0.373965		0.15038	0.603183	0.666667	0.23578	0.13226		44.3213	335.108	0.988507
										80	140				0	0	0	0	0	35.9874	62.978	331.463		0.0698149	0.415384		0.15038	0.633545	0.571429	0.23578	0.171393		51.7082	301.693	0.783905
										80	150				0	0	0	0	0	35.9874	67.4764	355.139		0.0665946	0.435471		0.15038	0.647487	0.533333	0.23578	0.192516		55.4017	287.777	0.706575
										100	100				0	0	0	0	0	44.9843	44.9843	236.759		0.087725	0.330578		0.187975	0.568623	1	0.294724	0.0974296		36.9344	379.089	1.39013
										100	120				0	0	0	0	0	44.9843	53.9811	284.111		0.0775473	0.373965		0.187975	0.603183	0.833333	0.294724	0.13226		44.3213	335.108	1.05695
										100	140				0	0	0	0	0	44.9843	62.978	331.463		0.0698149	0.415384		0.187975	0.633545	0.714286	0.294724	0.171393		51.7082	301.693	0.838178
										100	150				0	0	0	0	0	44.9843	67.4764	355.139		0.0665946	0.435471		0.187975	0.647487	0.666667	0.294724	0.192516		55.4017	287.777	0.755495

## Sheet: Tween 0pt3
	Rheology
	Shear Rate	Shear Stress	Viscosity	Temperature	Torque	Status
								Etching Depth [um]	Width [um]	Qd [ul/min]	Qc [ul/min]	L [um]	L_SD [um]	H [um]	H_SD [um]	L/Width	L/width_SD	H/width	H/width_SD	U_d [mm/s]	U_c [mm/s]	Shear Rate_c [1/s]	Eta_d [Pa*s]	Eta_c [Pa*s]	Alpha=eta_d/eta_c	Interfacial Tension [mN*m]	Ca_d	Ca_c	q=Qd/Qc	Re_d	Re_c	Lambda_s	Wi_c	El_d	Ca_c^(-0.5)*alpha^(-0.6)*Re_c^(-0.2)*q^0.3*Wi^(-0.3)
	[1/s]	[Pa]	[Pa·s]	[°C]	[µN·m]			190	195	5	10	451.584	40.5888	395.741	0	2.31582	0.208148	2.02944	0	2.24921	4.49843	23.6759	0.029	0.358353	0.0809257	2.49	0.0261957	0.6474	0.5	0.0147362	0.00238508	0.156	3.69344	1548.56	10.3163
	500	27.779	0.055537							5	20	338.688	20.2944	304.416	0	1.73686	0.104074	1.56111	0	2.24921	8.99685	47.3518		0.244033	0.118836		0.0261957	0.881738	0.25	0.0147362	0.0070048		7.38689	1054.55	3.73357
	396	25.696	0.064833							5	30	334.656	12.1766	284.122	0	1.71618	0.0624443	1.45703	0	2.24921	13.4953	71.0278		0.191293	0.1516		0.0261957	1.03677	0.166667	0.0147362	0.0134041		11.0803	826.641	2.04871
	315	23.775	0.075512							5	40	224.448	10.1472	221.209	0	1.15102	0.0520369	1.1344	0	2.24921	17.9937	94.7037		0.159857	0.181412		0.0261957	1.15519	0.125	0.0147362	0.0213867		14.7738	690.794	1.33558
	250	21.914	0.087613							5	50	220.416	8.11776	207.003	0	1.13034	0.0416295	1.06155	0	2.24921	22.4921	118.38		0.138619	0.209207		0.0261957	1.25214	0.1	0.0147362	0.0308292		18.4672	599.018	0.957448
	199	20.221	0.10177							5	60	211.008	8.11776	200.915	0	1.08209	0.0416295	1.03033	0	2.24921	26.9906	142.056		0.123146	0.235492		0.0261957	1.33486	0.0833333	0.0147362	0.0416431		22.1607	532.157	0.729053
	158	18.622	0.11797							5	70	196.224	4.05888	192.797	0	1.00628	0.0208148	0.988702	0	2.24921	31.489	165.731		0.111288	0.260585		0.0261957	1.40737	0.0714286	0.0147362	0.0537605		25.8541	480.912	0.578811
	125	17.118	0.13651							5	80	185.472	6.08832	178.591	0	0.951138	0.0312222	0.91585	0	2.24921	35.9874	189.407		0.101861	0.284701		0.0261957	1.47218	0.0625	0.0147362	0.0671266		29.5476	440.176	0.473822
	99.6	15.702	0.15763							5	90	177.408	8.11776	168.444	0	0.909785	0.0416295	0.863813	0	2.24921	40.4858	213.083		0.0941579	0.307993		0.0261957	1.53095	0.0555556	0.0147362	0.0816959		33.241	406.887	0.397074
	79.1	14.348	0.1813							5	100	161.28	6.08832	154.237	0	0.827077	0.0312222	0.790961	0	2.24921	44.9843	236.759		0.087725	0.330578		0.0261957	1.58484	0.05	0.0147362	0.0974296		36.9344	379.089	0.338974
	62.9	13.083	0.20809							5	120	153.216	6.08832	140.031	0	0.785723	0.0312222	0.71811	0	2.24921	53.9811	284.111		0.0775473	0.373965		0.0261957	1.68116	0.0416667	0.0147362	0.13226		44.3213	335.108	0.257729
	49.9	11.887	0.23799							5	140	149.184	10.1472	146.12	0	0.765046	0.0520369	0.749332	0	2.24921	62.978	331.463		0.0698149	0.415384		0.0261957	1.76578	0.0357143	0.0147362	0.171393		51.7082	301.693	0.204384
	39.7	10.754	0.27102							5	150	137.088	8.11776	129.884	0	0.703015	0.0416295	0.666073	0	2.24921	67.4764	355.139		0.0665946	0.435471		0.0261957	1.80464	0.0333333	0.0147362	0.192516		55.4017	287.777	0.184222
	31.5	9.6856	0.30728							10	10				0	0	0	0	0	4.49843	4.49843	23.6759		0.358353	0.0809257		0.0523913	0.6474	1	0.0294724	0.00238508		3.69344	1548.56	12.7008
	25	8.6865	0.3469							10	20				0	0	0	0	0	4.49843	8.99685	47.3518		0.244033	0.118836		0.0523913	0.881738	0.5	0.0294724	0.0070048		7.38689	1054.55	4.59657
	19.9	7.7544	0.38981							10	30	413.952	32.471	353.123	0	2.12283	0.166518	1.81088	0	4.49843	13.4953	71.0278		0.191293	0.1516		0.0523913	1.03677	0.333333	0.0294724	0.0134041		11.0803	826.641	2.52226
	15.8	6.8825	0.4355							10	40	356.16	24.3533	296.298	0	1.82646	0.124889	1.51948	0	4.49843	17.9937	94.7037		0.159857	0.181412		0.0523913	1.15519	0.25	0.0294724	0.0213867		14.7738	690.794	1.64429
	12.6	6.0773	0.48411							10	50	334.656	16.2355	282.092	0	1.71618	0.0832591	1.44663	0	4.49843	22.4921	118.38		0.138619	0.209207		0.0523913	1.25214	0.2	0.0294724	0.0308292		18.4672	599.018	1.17876
	9.97	5.3336	0.53481							10	60	322.56	12.1766	276.004	0	1.65415	0.0624443	1.4154	0	4.49843	26.9906	142.056		0.123146	0.235492		0.0523913	1.33486	0.166667	0.0294724	0.0416431		22.1607	532.157	0.89757
	7.92	4.6517	0.58717							10	70	288.96	12.1766	265.857	0	1.48185	0.0624443	1.36337	0	4.49843	31.489	165.731		0.111288	0.260585		0.0523913	1.40737	0.142857	0.0294724	0.0537605		25.8541	480.912	0.712599
	6.29	4.032	0.64069							10	80	272.832	14.2061	243.533	0	1.39914	0.0728517	1.24889	0	4.49843	35.9874	189.407		0.101861	0.284701		0.0523913	1.47218	0.125	0.0294724	0.0671266		29.5476	440.176	0.583343
	5	3.4736	0.69481							10	90	251.328	10.1472	223.238	0	1.28886	0.0520369	1.14481	0	4.49843	40.4858	213.083		0.0941579	0.307993		0.0523913	1.53095	0.111111	0.0294724	0.0816959		33.241	406.887	0.488855
	3.97	2.9729	0.7486							10	100	211.008	6.08832	200.915	0	1.08209	0.0312222	1.03033	0	4.49843	44.9843	236.759		0.087725	0.330578		0.0523913	1.58484	0.1	0.0294724	0.0974296		36.9344	379.089	0.417326
	3.15	2.5258	0.80066							10	120	172.032	8.11776	164.385	0	0.882215	0.0416295	0.842998	0	4.49843	53.9811	284.111		0.0775473	0.373965		0.0523913	1.68116	0.0833333	0.0294724	0.13226		44.3213	335.108	0.317302
	2.51	2.1188	0.84555							10	140	157.248	8.11776	144.09	0	0.8064	0.0416295	0.738924	0	4.49843	62.978	331.463		0.0698149	0.415384		0.0523913	1.76578	0.0714286	0.0294724	0.171393		51.7082	301.693	0.251626
	1.99	1.7752	0.89182							10	150	151.872	6.08832	140.031	0	0.778831	0.0312222	0.71811	0	4.49843	67.4764	355.139		0.0665946	0.435471		0.0523913	1.80464	0.0666667	0.0294724	0.192516		55.4017	287.777	0.226804
	1.58	1.4801	0.93595							20	20	559.7	19.3	355.12	0	2.87026	0.0989744	1.82113	0	8.99685	8.99685	47.3518		0.244033	0.118836		0.104783	0.881738	1	0.0589449	0.0070048		7.38689	1054.55	5.65904
	1.26	1.2312	0.98027							20	30	501.8	23.16	308.8	0	2.57333	0.118769	1.58359	0	8.99685	13.4953	71.0278		0.191293	0.1516		0.104783	1.03677	0.666667	0.0589449	0.0134041		11.0803	826.641	3.10527
	0.998	1.0182	1.0205							20	40	409.16	19.3	297.22	0	2.09826	0.0989744	1.52421	0	8.99685	17.9937	94.7037		0.159857	0.181412		0.104783	1.15519	0.5	0.0589449	0.0213867		14.7738	690.794	2.02436
	0.793	0.83772	1.0569							20	50	378.28	23.16	270.2	0	1.9399	0.118769	1.38564	0	8.99685	22.4921	118.38		0.138619	0.209207		0.104783	1.25214	0.4	0.0589449	0.0308292		18.4672	599.018	1.45122
	0.63	0.68287	1.0847							20	60	366.7	15.44	258.62	0	1.88051	0.0791795	1.32626	0	8.99685	26.9906	142.056		0.123146	0.235492		0.104783	1.33486	0.333333	0.0589449	0.0416431		22.1607	532.157	1.10504
	0.5	0.55694	1.1139							20	70	304.94	19.3	243.18	0	1.56379	0.0989744	1.24708	0	8.99685	31.489	165.731		0.111288	0.260585		0.104783	1.40737	0.285714	0.0589449	0.0537605		25.8541	480.912	0.877313
	0.397	0.45021	1.1332							20	80	281.78	19.3	223.88	0	1.44503	0.0989744	1.1481	0	8.99685	35.9874	189.407		0.101861	0.284701		0.104783	1.47218	0.25	0.0589449	0.0671266		29.5476	440.176	0.71818
	0.316	0.36463	1.1534							20	90	262.48	11.58	212.3	0	1.34605	0.0593846	1.08872	0	8.99685	40.4858	213.083		0.0941579	0.307993		0.104783	1.53095	0.222222	0.0589449	0.0816959		33.241	406.887	0.601851
	0.251	0.29397	1.1706							20	100	231.6	11.58	200.72	0	1.18769	0.0593846	1.02933	0	8.99685	44.9843	236.759		0.087725	0.330578		0.104783	1.58484	0.2	0.0589449	0.0974296		36.9344	379.089	0.513788
	0.199	0.23684	1.1874							20	120	212.3	11.58	185.28	0	1.08872	0.0593846	0.950154	0	8.99685	53.9811	284.111		0.0775473	0.373965		0.104783	1.68116	0.166667	0.0589449	0.13226		44.3213	335.108	0.390645
	0.158	0.18875	1.192							20	140	193	11.58	165.98	0	0.989744	0.0593846	0.851179	0	8.99685	62.978	331.463		0.0698149	0.415384		0.104783	1.76578	0.142857	0.0589449	0.171393		51.7082	301.693	0.309789
	0.126	0.15092	1.2							20	150	185.28	7.72	162.12	0	0.950154	0.0395897	0.831385	0	8.99685	67.4764	355.139		0.0665946	0.435471		0.104783	1.80464	0.133333	0.0589449	0.192516		55.4017	287.777	0.279229
	0.1	0.12295	1.2301							40	40				0	0	0	0	0	17.9937	17.9937	94.7037		0.159857	0.181412		0.209565	1.15519	1	0.11789	0.0213867		14.7738	690.794	2.49228
	0.0794	0.098146	1.2357							40	50				0	0	0	0	0	17.9937	22.4921	118.38		0.138619	0.209207		0.209565	1.25214	0.8	0.11789	0.0308292		18.4672	599.018	1.78666
	0.063	0.076415	1.2132							40	60				0	0	0	0	0	17.9937	26.9906	142.056		0.123146	0.235492		0.209565	1.33486	0.666667	0.11789	0.0416431		22.1607	532.157	1.36046
	0.0501	0.062041	1.2381							40	70				0	0	0	0	0	17.9937	31.489	165.731		0.111288	0.260585		0.209565	1.40737	0.571429	0.11789	0.0537605		25.8541	480.912	1.0801
										40	80				0	0	0	0	0	17.9937	35.9874	189.407		0.101861	0.284701		0.209565	1.47218	0.5	0.11789	0.0671266		29.5476	440.176	0.884183
										40	90	447.76	108.08	243.18	0	2.29621	0.554256	1.24708	0	17.9937	40.4858	213.083		0.0941579	0.307993		0.209565	1.53095	0.444444	0.11789	0.0816959		33.241	406.887	0.740966
										40	100	409.16	84.92	239.32	0	2.09826	0.435487	1.22728	0	17.9937	44.9843	236.759		0.087725	0.330578		0.209565	1.58484	0.4	0.11789	0.0974296		36.9344	379.089	0.632548
	Cross Model Viscosity									40	120	328.1	77.2	220.02	0	1.68256	0.395897	1.12831	0	17.9937	53.9811	284.111		0.0775473	0.373965		0.209565	1.68116	0.333333	0.11789	0.13226		44.3213	335.108	0.48094
	\eta=1.28/(1+(0.156*x)^0.723)									40	140	308.8	23.16	216.16	0	1.58359	0.118769	1.10851	0	17.9937	62.978	331.463		0.0698149	0.415384		0.209565	1.76578	0.285714	0.11789	0.171393		51.7082	301.693	0.381394
										40	150	293.36	19.3	204.58	0	1.50441	0.0989744	1.04913	0	17.9937	67.4764	355.139		0.0665946	0.435471		0.209565	1.80464	0.266667	0.11789	0.192516		55.4017	287.777	0.343771
										60	60				0	0	0	0	0	26.9906	26.9906	142.056		0.123146	0.235492		0.314348	1.33486	1	0.176835	0.0416431		22.1607	532.157	1.53643
										60	70				0	0	0	0	0	26.9906	31.489	165.731		0.111288	0.260585		0.314348	1.40737	0.857143	0.176835	0.0537605		25.8541	480.912	1.21981
										60	80				0	0	0	0	0	26.9906	35.9874	189.407		0.101861	0.284701		0.314348	1.47218	0.75	0.176835	0.0671266		29.5476	440.176	0.998549
										60	90				0	0	0	0	0	26.9906	40.4858	213.083		0.0941579	0.307993		0.314348	1.53095	0.666667	0.176835	0.0816959		33.241	406.887	0.836807
										60	100				0	0	0	0	0	26.9906	44.9843	236.759		0.087725	0.330578		0.314348	1.58484	0.6	0.176835	0.0974296		36.9344	379.089	0.714366
										60	120				0	0	0	0	0	26.9906	53.9811	284.111		0.0775473	0.373965		0.314348	1.68116	0.5	0.176835	0.13226		44.3213	335.108	0.543148
										60	140				0	0	0	0	0	26.9906	62.978	331.463		0.0698149	0.415384		0.314348	1.76578	0.428571	0.176835	0.171393		51.7082	301.693	0.430727
										60	150				0	0	0	0	0	26.9906	67.4764	355.139		0.0665946	0.435471		0.314348	1.80464	0.4	0.176835	0.192516		55.4017	287.777	0.388237
										80	80				0	0	0	0	0	35.9874	35.9874	189.407		0.101861	0.284701		0.41913	1.47218	1	0.23578	0.0671266		29.5476	440.176	1.08856
										80	90				0	0	0	0	0	35.9874	40.4858	213.083		0.0941579	0.307993		0.41913	1.53095	0.888889	0.23578	0.0816959		33.241	406.887	0.912236
										80	100				0	0	0	0	0	35.9874	44.9843	236.759		0.087725	0.330578		0.41913	1.58484	0.8	0.23578	0.0974296		36.9344	379.089	0.778758
										80	120				0	0	0	0	0	35.9874	53.9811	284.111		0.0775473	0.373965		0.41913	1.68116	0.666667	0.23578	0.13226		44.3213	335.108	0.592106
										80	140				0	0	0	0	0	35.9874	62.978	331.463		0.0698149	0.415384		0.41913	1.76578	0.571429	0.23578	0.171393		51.7082	301.693	0.469552
										80	150				0	0	0	0	0	35.9874	67.4764	355.139		0.0665946	0.435471		0.41913	1.80464	0.533333	0.23578	0.192516		55.4017	287.777	0.423232
										100	100				0	0	0	0	0	44.9843	44.9843	236.759		0.087725	0.330578		0.523913	1.58484	1	0.294724	0.0974296		36.9344	379.089	0.832675
										100	120				0	0	0	0	0	44.9843	53.9811	284.111		0.0775473	0.373965		0.523913	1.68116	0.833333	0.294724	0.13226		44.3213	335.108	0.633101
										100	140				0	0	0	0	0	44.9843	62.978	331.463		0.0698149	0.415384		0.523913	1.76578	0.714286	0.294724	0.171393		51.7082	301.693	0.502061
										100	150				0	0	0	0	0	44.9843	67.4764	355.139		0.0665946	0.435471		0.523913	1.80464	0.666667	0.294724	0.192516		55.4017	287.777	0.452534

## Sheet: Tween 1
	Rheology
	Shear Rate	Shear Stress	Viscosity	Temperature	Torque	Status
								Etching Depth [um]	Width [um]	Qd [ul/min]	Qc [ul/min]	L [um]	L_SD [um]	H [um]	H_SD [um]	L/Width	L/width_SD	H/width	H/width_SD	U_d [mm/s]	U_c [mm/s]	Shear Rate_c [1/s]	Eta_d [Pa*s]	Eta_c [Pa*s]	Alpha=eta_d/eta_c	Interfacial Tension [mN*m]	Ca_d	Ca_c	q=Qd/Qc	Re_d	Re_c	Lambda_s	Wi_c	El_d	Ca_c^(-0.5)*alpha^(-0.6)*Re_c^(-0.2)*q^0.3*Wi^(-0.3)
	[1/s]	[Pa]	[Pa·s]	[°C]	[µN·m]			190	195	5	10	291.648	28.224	223.104	0	1.49563	0.144738	1.14412	0	2.24921	4.49843	23.6759	0.029	0.358353	0.0809257	1.83	0.0356433	0.880888	0.5	0.0147362	0.00238508	0.156	3.69344	1548.56	8.844
	500	27.779	0.055537							5	20	233.856	21.504	182.784	0	1.19926	0.110277	0.937354	0	2.24921	8.99685	47.3518		0.244033	0.118836		0.0356433	1.19974	0.25	0.0147362	0.0070048		7.38689	1054.55	3.20074
	396	25.696	0.064833							5	30	200.256	14.784	174.72	0	1.02695	0.0758154	0.896	0	2.24921	13.4953	71.0278		0.191293	0.1516		0.0356433	1.41068	0.166667	0.0147362	0.0134041		11.0803	826.641	1.75633
	315	23.775	0.075512							5	40	165.312	13.44	151.872	0	0.847754	0.0689231	0.778831	0	2.24921	17.9937	94.7037		0.159857	0.181412		0.0356433	1.57181	0.125	0.0147362	0.0213867		14.7738	690.794	1.14498
	250	21.914	0.087613							5	50	146.496	13.44	134.4	0	0.751262	0.0689231	0.689231	0	2.24921	22.4921	118.38		0.138619	0.209207		0.0356433	1.70373	0.1	0.0147362	0.0308292		18.4672	599.018	0.820807
	199	20.221	0.10177							5	60	139.776	6.72	127.68	0	0.7168	0.0344615	0.654769	0	2.24921	26.9906	142.056		0.123146	0.235492		0.0356433	1.81628	0.0833333	0.0147362	0.0416431		22.1607	532.157	0.625007
	158	18.622	0.11797							5	70	133.056	8.064	123.648	0	0.682338	0.0413538	0.634092	0	2.24921	31.489	165.731		0.111288	0.260585		0.0356433	1.91494	0.0714286	0.0147362	0.0537605		25.8541	480.912	0.496206
	125	17.118	0.13651							5	80	127.68	5.376	122.304	0	0.654769	0.0275692	0.6272	0	2.24921	35.9874	189.407		0.101861	0.284701		0.0356433	2.00313	0.0625	0.0147362	0.0671266		29.5476	440.176	0.406201
	99.6	15.702	0.15763							5	90	126.336	5.376	114.24	0	0.647877	0.0275692	0.585846	0	2.24921	40.4858	213.083		0.0941579	0.307993		0.0356433	2.08309	0.0555556	0.0147362	0.0816959		33.241	406.887	0.340406
	79.1	14.348	0.1813							5	100	119.616	5.376	107.52	0	0.613415	0.0275692	0.551385	0	2.24921	44.9843	236.759		0.087725	0.330578		0.0356433	2.15642	0.05	0.0147362	0.0974296		36.9344	379.089	0.290598
	62.9	13.083	0.20809							5	120	104.832	4.032	99.456	0	0.5376	0.0206769	0.510031	0	2.24921	53.9811	284.111		0.0775473	0.373965		0.0356433	2.28748	0.0416667	0.0147362	0.13226		44.3213	335.108	0.220948
	49.9	11.887	0.23799							5	140	99.456	4.032	92.736	0	0.510031	0.0206769	0.475569	0	2.24921	62.978	331.463		0.0698149	0.415384		0.0356433	2.40262	0.0357143	0.0147362	0.171393		51.7082	301.693	0.175216
	39.7	10.754	0.27102							5	150	95.424	5.376	87.36	0	0.489354	0.0275692	0.448	0	2.24921	67.4764	355.139		0.0665946	0.435471		0.0356433	2.4555	0.0333333	0.0147362	0.192516		55.4017	287.777	0.157931
	31.5	9.6856	0.30728							10	10	490.56	33.6	262.08	0	2.51569	0.172308	1.344	0	4.49843	4.49843	23.6759		0.358353	0.0809257		0.0712865	0.880888	1	0.0294724	0.00238508		3.69344	1548.56	10.8882
	25	8.6865	0.3469							10	20	326.592	30.912	247.296	0	1.67483	0.158523	1.26818	0	4.49843	8.99685	47.3518		0.244033	0.118836		0.0712865	1.19974	0.5	0.0294724	0.0070048		7.38689	1054.55	3.94058
	19.9	7.7544	0.38981							10	30	259.392	26.88	198.912	0	1.33022	0.137846	1.02006	0	4.49843	13.4953	71.0278		0.191293	0.1516		0.0712865	1.41068	0.333333	0.0294724	0.0134041		11.0803	826.641	2.1623
	15.8	6.8825	0.4355							10	40	245.952	20.16	194.88	0	1.26129	0.103385	0.999385	0	4.49843	17.9937	94.7037		0.159857	0.181412		0.0712865	1.57181	0.25	0.0294724	0.0213867		14.7738	690.794	1.40963
	12.6	6.0773	0.48411							10	50	229.824	16.128	189.504	0	1.17858	0.0827077	0.971815	0	4.49843	22.4921	118.38		0.138619	0.209207		0.0712865	1.70373	0.2	0.0294724	0.0308292		18.4672	599.018	1.01053
	9.97	5.3336	0.53481							10	60	215.04	14.784	177.408	0	1.10277	0.0758154	0.909785	0	4.49843	26.9906	142.056		0.123146	0.235492		0.0712865	1.81628	0.166667	0.0294724	0.0416431		22.1607	532.157	0.769474
	7.92	4.6517	0.58717							10	70	198.912	13.44	177.408	0	1.02006	0.0689231	0.909785	0	4.49843	31.489	165.731		0.111288	0.260585		0.0712865	1.91494	0.142857	0.0294724	0.0537605		25.8541	480.912	0.610902
	6.29	4.032	0.64069							10	80	194.88	8.064	172.032	0	0.999385	0.0413538	0.882215	0	4.49843	35.9874	189.407		0.101861	0.284701		0.0712865	2.00313	0.125	0.0294724	0.0671266		29.5476	440.176	0.500092
	5	3.4736	0.69481							10	90	172.032	6.72	162.624	0	0.882215	0.0344615	0.833969	0	4.49843	40.4858	213.083		0.0941579	0.307993		0.0712865	2.08309	0.111111	0.0294724	0.0816959		33.241	406.887	0.419089
	3.97	2.9729	0.7486							10	100	127.68	6.72	115.584	0	0.654769	0.0344615	0.592738	0	4.49843	44.9843	236.759		0.087725	0.330578		0.0712865	2.15642	0.1	0.0294724	0.0974296		36.9344	379.089	0.357768
	3.15	2.5258	0.80066							10	120	115.584	6.72	108.864	0	0.592738	0.0344615	0.558277	0	4.49843	53.9811	284.111		0.0775473	0.373965		0.0712865	2.28748	0.0833333	0.0294724	0.13226		44.3213	335.108	0.272019
	2.51	2.1188	0.84555							10	140	114.24	6.72	104.832	0	0.585846	0.0344615	0.5376	0	4.49843	62.978	331.463		0.0698149	0.415384		0.0712865	2.40262	0.0714286	0.0294724	0.171393		51.7082	301.693	0.215716
	1.99	1.7752	0.89182							10	150	111.552	4.032	99.456	0	0.572062	0.0206769	0.510031	0	4.49843	67.4764	355.139		0.0665946	0.435471		0.0712865	2.4555	0.0666667	0.0294724	0.192516		55.4017	287.777	0.194436
	1.58	1.4801	0.93595							20	20				0	0	0	0	0	8.99685	8.99685	47.3518		0.244033	0.118836		0.142573	1.19974	1	0.0589449	0.0070048		7.38689	1054.55	4.85142
	1.26	1.2312	0.98027							20	30				0	0	0	0	0	8.99685	13.4953	71.0278		0.191293	0.1516		0.142573	1.41068	0.666667	0.0589449	0.0134041		11.0803	826.641	2.66211
	0.998	1.0182	1.0205							20	40	470.92	61.76	281.78	0	2.41497	0.316718	1.44503	0	8.99685	17.9937	94.7037		0.159857	0.181412		0.142573	1.57181	0.5	0.0589449	0.0213867		14.7738	690.794	1.73546
	0.793	0.83772	1.0569							20	50	401.44	135.1	247.04	0	2.05867	0.692821	1.26687	0	8.99685	22.4921	118.38		0.138619	0.209207		0.142573	1.70373	0.4	0.0589449	0.0308292		18.4672	599.018	1.24411
	0.63	0.68287	1.0847							20	60				0	0	0	0	0	8.99685	26.9906	142.056		0.123146	0.235492		0.142573	1.81628	0.333333	0.0589449	0.0416431		22.1607	532.157	0.947334
	0.5	0.55694	1.1139							20	70	316.52	154.4	212.3	0	1.62318	0.791795	1.08872	0	8.99685	31.489	165.731		0.111288	0.260585		0.142573	1.91494	0.285714	0.0589449	0.0537605		25.8541	480.912	0.752108
	0.397	0.45021	1.1332							20	80	274.06	57.9	193	0	1.40544	0.296923	0.989744	0	8.99685	35.9874	189.407		0.101861	0.284701		0.142573	2.00313	0.25	0.0589449	0.0671266		29.5476	440.176	0.615686
	0.316	0.36463	1.1534							20	90	231.6	34.74	196.86	0	1.18769	0.178154	1.00954	0	8.99685	40.4858	213.083		0.0941579	0.307993		0.142573	2.08309	0.222222	0.0589449	0.0816959		33.241	406.887	0.515959
	0.251	0.29397	1.1706							20	100	250.9	15.44	208.44	0	1.28667	0.0791795	1.06892	0	8.99685	44.9843	236.759		0.087725	0.330578		0.142573	2.15642	0.2	0.0589449	0.0974296		36.9344	379.089	0.440464
	0.199	0.23684	1.1874							20	120	204.58	19.3	177.56	0	1.04913	0.0989744	0.910564	0	8.99685	53.9811	284.111		0.0775473	0.373965		0.142573	2.28748	0.166667	0.0589449	0.13226		44.3213	335.108	0.334894
	0.158	0.18875	1.192							20	140	189.14	11.58	173.7	0	0.969949	0.0593846	0.890769	0	8.99685	62.978	331.463		0.0698149	0.415384		0.142573	2.40262	0.142857	0.0589449	0.171393		51.7082	301.693	0.265577
	0.126	0.15092	1.2							20	150	181.42	11.58	165.98	0	0.930359	0.0593846	0.851179	0	8.99685	67.4764	355.139		0.0665946	0.435471		0.142573	2.4555	0.133333	0.0589449	0.192516		55.4017	287.777	0.239379
	0.1	0.12295	1.2301							40	40				0	0	0	0	0	17.9937	17.9937	94.7037		0.159857	0.181412		0.285146	1.57181	1	0.11789	0.0213867		14.7738	690.794	2.1366
	0.0794	0.098146	1.2357							40	50				0	0	0	0	0	17.9937	22.4921	118.38		0.138619	0.209207		0.285146	1.70373	0.8	0.11789	0.0308292		18.4672	599.018	1.53168
	0.063	0.076415	1.2132							40	60				0	0	0	0	0	17.9937	26.9906	142.056		0.123146	0.235492		0.285146	1.81628	0.666667	0.11789	0.0416431		22.1607	532.157	1.16631
	0.0501	0.062041	1.2381							40	70				0	0	0	0	0	17.9937	31.489	165.731		0.111288	0.260585		0.285146	1.91494	0.571429	0.11789	0.0537605		25.8541	480.912	0.925954
										40	80	663.92	100.36	277.92	0	3.40472	0.514667	1.42523	0	17.9937	35.9874	189.407		0.101861	0.284701		0.285146	2.00313	0.5	0.11789	0.0671266		29.5476	440.176	0.757998
										40	90	706.38	88.78	254.76	0	3.62246	0.455282	1.30646	0	17.9937	40.4858	213.083		0.0941579	0.307993		0.285146	2.08309	0.444444	0.11789	0.0816959		33.241	406.887	0.63522
										40	100				0	0	0	0	0	17.9937	44.9843	236.759		0.087725	0.330578		0.285146	2.15642	0.4	0.11789	0.0974296		36.9344	379.089	0.542275
	Cross Model Viscosity									40	120	459.34	77.2	235.46	0	2.35559	0.395897	1.20749	0	17.9937	53.9811	284.111		0.0775473	0.373965		0.285146	2.28748	0.333333	0.11789	0.13226		44.3213	335.108	0.412303
	\eta=1.28/(1+(0.156*x)^0.723)									40	140	413.02	77.2	231.6	0	2.11805	0.395897	1.18769	0	17.9937	62.978	331.463		0.0698149	0.415384		0.285146	2.40262	0.285714	0.11789	0.171393		51.7082	301.693	0.326964
										40	150	335.82	23.16	189.14	0	1.72215	0.118769	0.969949	0	17.9937	67.4764	355.139		0.0665946	0.435471		0.285146	2.4555	0.266667	0.11789	0.192516		55.4017	287.777	0.29471
										60	60				0	0	0	0	0	26.9906	26.9906	142.056		0.123146	0.235492		0.427719	1.81628	1	0.176835	0.0416431		22.1607	532.157	1.31716
										60	70				0	0	0	0	0	26.9906	31.489	165.731		0.111288	0.260585		0.427719	1.91494	0.857143	0.176835	0.0537605		25.8541	480.912	1.04572
										60	80				0	0	0	0	0	26.9906	35.9874	189.407		0.101861	0.284701		0.427719	2.00313	0.75	0.176835	0.0671266		29.5476	440.176	0.856043
										60	90				0	0	0	0	0	26.9906	40.4858	213.083		0.0941579	0.307993		0.427719	2.08309	0.666667	0.176835	0.0816959		33.241	406.887	0.717383
										60	100				0	0	0	0	0	26.9906	44.9843	236.759		0.087725	0.330578		0.427719	2.15642	0.6	0.176835	0.0974296		36.9344	379.089	0.612416
										60	120				0	0	0	0	0	26.9906	53.9811	284.111		0.0775473	0.373965		0.427719	2.28748	0.5	0.176835	0.13226		44.3213	335.108	0.465633
										60	140				0	0	0	0	0	26.9906	62.978	331.463		0.0698149	0.415384		0.427719	2.40262	0.428571	0.176835	0.171393		51.7082	301.693	0.369256
										60	150				0	0	0	0	0	26.9906	67.4764	355.139		0.0665946	0.435471		0.427719	2.4555	0.4	0.176835	0.192516		55.4017	287.777	0.33283
										80	80				0	0	0	0	0	35.9874	35.9874	189.407		0.101861	0.284701		0.570292	2.00313	1	0.23578	0.0671266		29.5476	440.176	0.933205
										80	90				0	0	0	0	0	35.9874	40.4858	213.083		0.0941579	0.307993		0.570292	2.08309	0.888889	0.23578	0.0816959		33.241	406.887	0.782047
										80	100				0	0	0	0	0	35.9874	44.9843	236.759		0.087725	0.330578		0.570292	2.15642	0.8	0.23578	0.0974296		36.9344	379.089	0.667618
										80	120				0	0	0	0	0	35.9874	53.9811	284.111		0.0775473	0.373965		0.570292	2.28748	0.666667	0.23578	0.13226		44.3213	335.108	0.507605
										80	140				0	0	0	0	0	35.9874	62.978	331.463		0.0698149	0.415384		0.570292	2.40262	0.571429	0.23578	0.171393		51.7082	301.693	0.40254
										80	150				0	0	0	0	0	35.9874	67.4764	355.139		0.0665946	0.435471		0.570292	2.4555	0.533333	0.23578	0.192516		55.4017	287.777	0.362831
										100	100				0	0	0	0	0	44.9843	44.9843	236.759		0.087725	0.330578		0.712865	2.15642	1	0.294724	0.0974296		36.9344	379.089	0.713841
										100	120				0	0	0	0	0	44.9843	53.9811	284.111		0.0775473	0.373965		0.712865	2.28748	0.833333	0.294724	0.13226		44.3213	335.108	0.542749
										100	140				0	0	0	0	0	44.9843	62.978	331.463		0.0698149	0.415384		0.712865	2.40262	0.714286	0.294724	0.171393		51.7082	301.693	0.43041
										100	150				0	0	0	0	0	44.9843	67.4764	355.139		0.0665946	0.435471		0.712865	2.4555	0.666667	0.294724	0.192516		55.4017	287.777	0.387951
