# Supplementary material for: Dimensional analysis meets AI for non-Newtonian droplet generation
Source: Lab Chip. 2025 Feb 12;25(7):1681–93. doi: 10.1039/d4lc00946k (PMC11834948; doi:10.1039/d4lc00946k)
Supplement: LC-025-D4LC00946K-s005 [file LC-025-D4LC00946K-s005.xlsx]

## Sheet: Water
	Rheology
	Shear Rate	Shear Stress	Viscosity	Temperature	Torque	Status		Etching Depth [um]	Width [um]	Qd [ul/min]	Qc [ul/min]	L [pixels]	L_SD [pixels]	H [pixels]	H_SD [pixels]	Frequency [Hz]	L[um]	L_SD[um]	H [um]	H_SD [um]	L/Width	L/width_SD	H/Width	H/Width_SD	U_d [mm/s]	U_c [mm/s]	ShearRate_d [1/s]	Eta_d [Pa*s]	Eta_c [Pa*s]	Alpha=eta_d\eta_c	Interfacial Tension [mN*m]	Ca_d	Ca_c	q=Qd/Qc	Re_d	Re_c	Lambda_s	Wi_d	El_d	Ca^-0.6*q^0.57*Wid^0.45	Ca^-0.6*q^0.57}	q/Ca_c
								100	105	10	100						0	0	0	0	0	0	0	0	15.873	158.73	158.73	0.001	0.29	0.00344828	3.63	0.00437273	12.6809	0.1	1.5873	0.0547345	0	0	0	0	0.0586286	0.00788586
	[1/s]	[Pa]	[Pa·s]	[°C]	[µN·m]					10	10						0	0	0	0	0	0	0	0	15.873	15.873	158.73	0.001		0.00344828		0.00437273	1.26809	1	1.5873	0.00547345		0	0	0	0.867181	0.788586
										10	20						0	0	0	0	0	0	0	0	15.873	31.746	158.73	0.001		0.00344828		0.00437273	2.53618	0.5	1.5873	0.0109469		0	0	0	0.385394	0.197147
										10	30						0	0	0	0	0	0	0	0	15.873	47.619	158.73	0.001		0.00344828		0.00437273	3.80428	0.333333	1.5873	0.0164204		0	0	0	0.239816	0.0876207
										10	40						0	0	0	0	0	0	0	0	15.873	63.4921	158.73	0.001		0.00344828		0.00437273	5.07237	0.25	1.5873	0.0218938		0	0	0	0.171277	0.0492866
										10	50						0	0	0	0	0	0	0	0	15.873	79.3651	158.73	0.001		0.00344828		0.00437273	6.34046	0.2	1.5873	0.0273673		0	0	0	0.131921	0.0315434
										10	60						0	0	0	0	0	0	0	0	15.873	95.2381	158.73	0.001		0.00344828		0.00437273	7.60855	0.166667	1.5873	0.0328407		0	0	0	0.106579	0.0219052
										10	70						0	0	0	0	0	0	0	0	15.873	111.111	158.73	0.001		0.00344828		0.00437273	8.87665	0.142857	1.5873	0.0383142		0	0	0	0.0889907	0.0160936
										10	80						0	0	0	0	0	0	0	0	15.873	126.984	158.73	0.001		0.00344828		0.00437273	10.1447	0.125	1.5873	0.0437876		0	0	0	0.0761192	0.0123217
										10	90						0	0	0	0	0	0	0	0	15.873	142.857	158.73	0.001		0.00344828		0.00437273	11.4128	0.111111	1.5873	0.0492611		0	0	0	0.0663202	0.00973563
										20	100						0	0	0	0	0	0	0	0	31.746	158.73	317.46	0.001		0.00344828		0.00874546	12.6809	0.2	3.1746	0.0547345		0	0	0	0.0870355	0.0157717
										20	20	28.3333	1.36626	28	1.41412	512	110.375	5.3224	109.077	5.50884	1.05119	0.0506895	1.03883	0.0524651	31.746	31.746	317.46	0.001		0.00344828		0.00874546	2.53618	1	3.1746	0.0109469		0	0	0	0.572126	0.394293
										20	30	30.3333	1.0328	28.6667	3.2659	536	118.166	4.02336	111.674	12.7226	1.12539	0.0383177	1.06356	0.121168	31.746	47.619	317.46	0.001		0.00344828		0.00874546	3.80428	0.666667	3.1746	0.0164204		0	0	0	0.356012	0.175241
										20	40	31.6	0.894447	27	1	736	123.101	3.48441	105.181	3.8956	1.17239	0.0331848	1.00173	0.0371009	31.746	63.4921	317.46	0.001		0.00344828		0.00874546	5.07237	0.5	3.1746	0.0218938		0	0	0	0.254265	0.0985733
										20	50						0	0	0	0	0	0	0	0	31.746	79.3651	317.46	0.001		0.00344828		0.00874546	6.34046	0.4	3.1746	0.0273673		0	0	0	0.19584	0.0630869
										20	50						0	0	0	0	0	0	0	0	31.746	79.3651	317.46	0.001		0.00344828		0.00874546	6.34046	0.4	3.1746	0.0273673		0	0	0	0.19584	0.0630869
										20	60						0	0	0	0	0	0	0	0	31.746	95.2381	317.46	0.001		0.00344828		0.00874546	7.60855	0.333333	3.1746	0.0328407		0	0	0	0.158219	0.0438103
										20	70						0	0	0	0	0	0	0	0	31.746	111.111	317.46	0.001		0.00344828		0.00874546	8.87665	0.285714	3.1746	0.0383142		0	0	0	0.132109	0.0321872
										20	80						0	0	0	0	0	0	0	0	31.746	126.984	317.46	0.001		0.00344828		0.00874546	10.1447	0.25	3.1746	0.0437876		0	0	0	0.113001	0.0246433
										20	90						0	0	0	0	0	0	0	0	31.746	142.857	317.46	0.001		0.00344828		0.00874546	11.4128	0.222222	3.1746	0.0492611		0	0	0	0.0984539	0.0194713
										40	100						0	0	0	0	0	0	0	0	63.4921	158.73	634.921	0.001		0.00344828		0.0174909	12.6809	0.4	6.34921	0.0547345		0	0	0	0.129206	0.0315434
										40	40	32	0.707107	23.6	0.894427	1344	124.659	2.7546	91.9361	3.48433	1.18723	0.0262343	0.875582	0.0331841	63.4921	63.4921	634.921	0.001		0.00344828		0.0174909	5.07237	1	6.34921	0.0218938		0	0	0	0.377462	0.197147
										40	50	24.8333	0.752773	20.6667	1.0328	1776	96.7406	2.9325	80.509	4.02336	0.921339	0.0279286	0.766753	0.0383177	63.4921	79.3651	634.921	0.001		0.00344828		0.0174909	6.34046	0.8	6.34921	0.0273673		0	0	0	0.290729	0.126174
										40	60						0	0	0	0	0	0	0	0	63.4921	95.2381	634.921	0.001		0.00344828		0.0174909	7.60855	0.666667	6.34921	0.0328407		0	0	0	0.23488	0.0876207
										40	80						0	0	0	0	0	0	0	0	63.4921	126.984	634.921	0.001		0.00344828		0.0174909	10.1447	0.5	6.34921	0.0437876		0	0	0	0.167752	0.0492866
										5	100	6.125	1.12599	4.875	1.45774	95	23.8605	4.38641	18.991	5.67876	0.227243	0.0417754	0.180867	0.0540834	7.93651	158.73	79.3651	0.001		0.00344828		0.00218637	12.6809	0.05	0.793651	0.0547345		0	0	0	0.0394932	0.00394293
										5	10	26.7511	1.0036	25.9677	0.9805	137	104.212	3.90962	101.16	3.81963	0.992491	0.0372345	0.963426	0.0363775	7.93651	15.873	79.3651	0.001		0.00344828		0.00218637	1.26809	0.5	0.793651	0.00547345		0	0	0	0.584147	0.394293
										5	15	28.917	4.3695	26.9185	4.3118	167	112.649	17.0218	104.864	16.797	1.07285	0.162113	0.998701	0.159972	7.93651	23.8095	79.3651	0.001		0.00344828		0.00218637	1.90214	0.333333	0.793651	0.00821018		0	0	0	0.363493	0.175241
										5	20	23.4535	2.7973	21.3964	2.0997	70	91.3654	10.8972	83.3518	8.17959	0.870147	0.103782	0.793826	0.0779008	7.93651	31.746	79.3651	0.001		0.00344828		0.00218637	2.53618	0.25	0.793651	0.0109469		0	0	0	0.259608	0.0985733
										5	25	29.1095	2.0754	24.8358	2.4469	155	113.399	8.08492	96.7503	9.53214	1.07999	0.0769993	0.921431	0.0907823	7.93651	39.6825	79.3651	0.001		0.00344828		0.00218637	3.17023	0.2	0.793651	0.0136836		0	0	0	0.199955	0.0630869
										5	30	19.7013	0.4717	17.627	3.7393	125	76.7483	1.83755	68.6677	14.5668	0.730937	0.0175005	0.653978	0.138732	7.93651	47.619	79.3651	0.001		0.00344828		0.00218637	3.80428	0.166667	0.793651	0.0164204		0	0	0	0.161544	0.0438103
										5	40	17.3564	1.3474	16.0182	2.3244	76	67.6136	5.24893	62.4005	9.05493	0.643939	0.0499898	0.59429	0.0862374	7.93651	63.4921	79.3651	0.001		0.00344828		0.00218637	5.07237	0.125	0.793651	0.0218938		0	0	0	0.115375	0.0246433
										5	50	17.1075	1.4236	15.4368	1.4026	112	66.6439	5.54577	60.1356	5.46397	0.634704	0.0528169	0.57272	0.0520378	7.93651	79.3651	79.3651	0.001		0.00344828		0.00218637	6.34046	0.1	0.793651	0.0273673		0	0	0	0.0888643	0.0157717
	Cross Model Viscosity		Interfacial Tension [mN*m]							5	60	22.8318	3.5121	13.1779	0.8797	106	88.9435	13.6817	51.3358	3.42696	0.847081	0.130302	0.488912	0.0326377	7.93651	95.2381	79.3651	0.001		0.00344828		0.00218637	7.60855	0.0833333	0.793651	0.0328407		0	0	0	0.0717936	0.0109526
			3.63							5	70	23.2763	2.1056	12.1343	0.6771	152	90.6751	8.20257	47.2704	2.63771	0.863572	0.0781197	0.450194	0.025121	7.93651	111.111	79.3651	0.001		0.00344828		0.00218637	8.87665	0.0714286	0.793651	0.0383142		0	0	0	0.0599457	0.0080468
										5	80	21.5463	1.9185	11.08	0.991	80	83.9357	7.4737	43.1632	3.86054	0.799388	0.0711781	0.411078	0.036767	7.93651	126.984	79.3651	0.001		0.00344828		0.00218637	10.1447	0.0625	0.793651	0.0437876		0	0	0	0.0512752	0.00616083
										5	90						0	0	0	0	0	0	0	0	7.93651	142.857	79.3651	0.001		0.00344828		0.00218637	11.4128	0.0555556	0.793651	0.0492611		0	0	0	0.0446744	0.00486782
										60	60	25.1429	4.74091	19.8571	3.33809	2016	97.9465	18.4687	77.3554	13.0039	0.932824	0.175892	0.736718	0.123846	95.2381	95.2381	952.381	0.001		0.00344828		0.0262364	7.60855	1	9.52381	0.0328407		0	0	0	0.29595	0.131431
										60	80	78.0833	35.7376	54.5	8.57587	280	304.181	139.219	212.31	33.4081	2.89696	1.3259	2.022	0.318173	95.2381	126.984	952.381	0.001		0.00344828		0.0262364	10.1447	0.75	9.52381	0.0437876		0	0	0	0.211369	0.07393

## Sheet: HA0pt01
	Rheology
	Shear Rate	Shear Stress	Viscosity	Temperature	Torque	Status		Etching Depth [um]	Width [um]	Qd [ul/min]	Qc [ul/min]	L [pixels]	L_SD [pixels]	H [pixels]	H_SD [pixels]	Frequency [Hz]	L[um]	L_SD[um]	H [um]	H_SD [um]	L/Width	L/width_SD	H/Width	H/Width_SD	U_d [mm/s]	U_c [mm/s]	ShearRate_d [1/s]	Eta_d [Pa*s]	Eta_c [Pa*s]	Alpha=eta_d\eta_c	Interfacial Tension [mN*m]	Ca_d	Ca_c	q=Qd/Qc	Re_d	Re_c	Lambda_s	Wi_d	El_d	Ca^-0.6*q^0.57*Wid^0.45	Ca^-0.6*q^0.57}	(q*Wid/Ca_c)^0.6	(q/Ca_c)^0.6*Wi_d^0.45	q/Ca_c
								100	105	10	100	19.4619	2.6918	17.9689	2.8841	364	75.8157	10.4862	69.9996	11.2353	0.722055	0.0998683	0.666663	0.107003	15.873	158.73	158.73	0.00269342	0.29	0.00928766	3.63	0.0117776	12.6809	0.1	0.589325	0.0547345	0.00033	0.052381	0.0888829	0.0155503	0.0586286	0.00932424	0.0145123	0.00788586
	[1/s]	[Pa]	[Pa·s]	[°C]	[µN·m]					10	100	31.0311	0.2055	30.3648	0.2148	184	120.885	0.800545	118.289	0.836774	1.15128	0.00762424	1.12656	0.00796928	15.873	158.73	158.73	0.00269342		0.00928766		0.0117776	12.6809	0.1	0.589325	0.0547345		0.052381	0.0888829	0.0155503	0.0586286	0.00932424	0.0145123	0.00788586
	1000	1.6566	0.0016557	20.97	54.215	Dy_auto				10	20	24.8545	0.1169	24.5188	0.147	384	96.8231	0.455395	95.5154	0.572653	0.922125	0.0043371	0.90967	0.00545384	15.873	31.746	158.73	0.00269342		0.00928766		0.0117776	2.53618	0.5	0.589325	0.0109469		0.052381	0.0888829	0.102219	0.385394	0.0643247	0.100116	0.197147
	790	1.3524	0.001712	20.97	44.261	Dy_auto				10	30	50.6497	6.9302	46.0178	6.9113	100	197.311	26.9973	179.267	26.9236	1.87915	0.257117	1.7073	0.256416	15.873	47.619	158.73	0.00269342		0.00928766		0.0117776	3.80428	0.333333	0.589325	0.0164204		0.052381	0.0888829	0.0636071	0.239816	0.0395429	0.0615449	0.0876207
	628	1.1035	0.0017581	20.96	36.115	Dy_auto				10	40	50.5138	4.0942	46.4768	4.9349	152	196.781	15.9494	181.055	19.2244	1.87411	0.151899	1.72433	0.183089	15.873	63.4921	158.73	0.00269342		0.00928766		0.0117776	5.07237	0.25	0.589325	0.0218938		0.052381	0.0888829	0.0454284	0.171277	0.0279989	0.0435778	0.0492866
	499	0.90003	0.0018053	20.96	29.456	Dy_auto				10	50	31.7956	4.1274	30.5094	4.0641	264	123.863	16.0787	118.852	15.8321	1.17965	0.15313	1.13193	0.150782	15.873	79.3651	158.73	0.00269342		0.00928766		0.0117776	6.34046	0.2	0.589325	0.0273673		0.052381	0.0888829	0.0349899	0.131921	0.0214215	0.0333406	0.0315434
	396	0.73519	0.0018565	20.96	24.061	Dy_auto				10	60	27.461	3.5872	26.5178	3.7978	368	106.977	13.9743	103.303	14.7947	1.01883	0.133088	0.983835	0.140902	15.873	95.2381	158.73	0.00269342		0.00928766		0.0117776	7.60855	0.166667	0.589325	0.0328407		0.052381	0.0888829	0.0282684	0.106579	0.017212	0.026789	0.0219052
	315	0.59987	0.001907	20.96	19.632	Dy_auto				10	70	26.3313	2.9964	25.1813	3.4046	492	102.576	11.6728	98.0962	13.263	0.976916	0.111169	0.93425	0.126314	15.873	111.111	158.73	0.00269342		0.00928766		0.0117776	8.87665	0.142857	0.589325	0.0383142		0.052381	0.0888829	0.0236033	0.0889907	0.0143053	0.0222649	0.0160936
	250	0.49029	0.0019623	20.96	16.046	Dy_auto				10	80	20.3177	3.1454	18.2975	3.5504	724	79.1496	12.2532	71.2797	13.8309	0.753806	0.116697	0.678854	0.131723	15.873	126.984	158.73	0.00269342		0.00928766		0.0117776	10.1447	0.125	0.589325	0.0437876		0.052381	0.0888829	0.0201893	0.0761192	0.0121872	0.0189683	0.0123217
	198	0.39799	0.0020053	20.96	13.025	Dy_auto				10	90	23.6669	3.4437	22.6149	3.8037	664	92.1967	13.4153	88.0986	14.8177	0.878064	0.127764	0.839034	0.141121	15.873	142.857	158.73	0.00269342		0.00928766		0.0117776	11.4128	0.111111	0.589325	0.0492611		0.052381	0.0888829	0.0175903	0.0663202	0.0105809	0.0164682	0.00973563
	158	0.32416	0.0020562	20.95	10.609	Dy_auto				20	100	34.6327	4.9537	32.0397	3.9929	456	134.915	19.2976	124.814	15.5547	1.28491	0.183787	1.1887	0.14814	31.746	158.73	317.46	0.00269136		0.00928054		0.0235372	12.6809	0.2	1.17955	0.0547345		0.104762	0.0888148	0.0315347	0.0870355	0.0214215	0.0300482	0.0157717
	125	0.26378	0.0021065	20.95	8.633	Dy_auto				20	20	87.6374	30.0694	60.5857	11.5976	52	341.4	117.138	236.018	45.1796	3.25143	1.1156	2.24779	0.430282	31.746	31.746	317.46	0.00269136		0.00928054		0.0235372	2.53618	1	1.17955	0.0109469		0.104762	0.0888148	0.207292	0.572126	0.147779	0.207292	0.394293
	99.5	0.21416	0.002153	20.95	7.009	Dy_auto				20	30	85.0371	34.8918	60.7207	12.3541	88	331.27	135.924	236.543	48.1266	3.15496	1.29452	2.25279	0.458349	31.746	47.619	317.46	0.00269136		0.00928054		0.0235372	3.80428	0.666667	1.17955	0.0164204		0.104762	0.0888148	0.12899	0.356012	0.0908456	0.127431	0.175241
	79	0.17323	0.0021925	20.95	5.6695	Dy_auto				20	40	63.0012	11.5665	52.9277	9.4806	116	245.427	45.0584	206.185	36.9326	2.3374	0.429128	1.96367	0.351739	31.746	63.4921	317.46	0.00269136		0.00928054		0.0235372	5.07237	0.5	1.17955	0.0218938		0.104762	0.0888148	0.0921251	0.254265	0.0643247	0.0902292	0.0985733
	62.8	0.13978	0.0022271	20.95	4.5746	Dy_auto				20	50	53.3334	8.7399	46.283	7.0003	152	207.765	34.0471	180.3	27.2704	1.97872	0.324258	1.71714	0.259718	31.746	79.3651	317.46	0.00269136		0.00928054		0.0235372	6.34046	0.4	1.17955	0.0273673		0.104762	0.0888148	0.0709567	0.19584	0.0492136	0.0690327	0.0630869
	49.9	0.11232	0.0022531	20.95	3.676	Dy_auto				20	60	46.7267	8.5154	41.4641	7.2264	204	182.028	33.1726	161.527	28.1511	1.7336	0.315929	1.53836	0.268106	31.746	95.2381	317.46	0.00269136		0.00928054		0.0235372	7.60855	0.333333	1.17955	0.0328407		0.104762	0.0888148	0.0573259	0.158219	0.0395429	0.0554674	0.0438103
	39.6	0.091154	0.0023019	20.94	2.9833	Dy_auto				20	70	40.7955	6.5781	37.1534	5.5312	296	158.923	25.6256	144.735	21.5473	1.51355	0.244054	1.37843	0.205213	31.746	111.111	317.46	0.00269136		0.00928054		0.0235372	8.87665	0.285714	1.17955	0.0383142		0.104762	0.0888148	0.0478656	0.132109	0.0328649	0.0461	0.0321872
	31.5	0.073276	0.0023295	20.94	2.3982	Dy_auto				20	80	34.2978	4.9936	32.0437	4.2537	376	133.61	19.4531	124.829	16.5707	1.27248	0.185267	1.18885	0.157816	31.746	126.984	317.46	0.00269136		0.00928054		0.0235372	10.1447	0.25	1.17955	0.0437876		0.104762	0.0888148	0.0409424	0.113001	0.0279989	0.0392745	0.0246433
	25	0.059013	0.0023618	20.94	1.9314	Dy_auto				20	90	34.5547	6.5109	31.9897	6.2014	388	134.611	25.3638	124.619	24.1582	1.28201	0.24156	1.18685	0.230078	31.746	142.857	317.46	0.00269136		0.00928054		0.0235372	11.4128	0.222222	1.17955	0.0492611		0.104762	0.0888148	0.0356717	0.0984539	0.0243085	0.0340979	0.0194713
	19.8	0.047166	0.0023764	20.94	1.5436	Dy_auto				40	100	47.6179	9.0471	39.7661	7.496	168	185.5	35.2439	154.913	29.2014	1.76667	0.335656	1.47536	0.278109	63.4921	158.73	634.921	0.00268865		0.0092712		0.0470269	12.6809	0.4	2.36149	0.0547345		0.209524	0.0887253	0.0639497	0.129206	0.0492136	0.0622158	0.0315434
	15.8	0.038421	0.002437	20.94	1.2574	Dy_auto				40	40	243.157	85.2033	66.479	4.60055	48	947.242	331.918	258.975	17.9219	9.02135	3.16112	2.46643	0.170685	63.4921	63.4921	634.921	0.00268865		0.0092712		0.0470269	5.07237	1	2.36149	0.0218938		0.209524	0.0887253	0.186822	0.377462	0.147779	0.186822	0.197147
	12.5	0.029701	0.0023716	20.94	0.97205	Dy_auto				40	60	88.3427	19.2447	61.782	6.15959	144	344.148	74.9696	240.678	23.9953	3.2776	0.713996	2.29217	0.228527	63.4921	95.2381	634.921	0.00268865		0.0092712		0.0470269	7.60855	0.666667	2.36149	0.0328407		0.209524	0.0887253	0.116252	0.23488	0.0908456	0.114847	0.0876207
	9.99	0.023418	0.0023438	20.93	0.76642	Dy_auto				40	80	71.4872	16.0162	56.0917	7.15191	224	278.485	62.3927	218.511	27.861	2.65224	0.594216	2.08105	0.265342	63.4921	126.984	634.921	0.00268865		0.0092712		0.0470269	10.1447	0.5	2.36149	0.0437876		0.209524	0.0887253	0.0830278	0.167752	0.0643247	0.0813191	0.0492866
	7.92	0.018534	0.00234	20.93	0.60659	Dy_auto				5	100	12.0435	2.1329	10.1548	2.52	432	46.9166	8.30892	39.559	9.81691	0.446825	0.0791326	0.376753	0.0934944	7.93651	158.73	79.3651	0.00269499		0.00929309		0.00589224	12.6809	0.05	0.294491	0.0547345		0.0261905	0.0889348	0.00766809	0.0394932	0.00405861	0.007009	0.00394293
	6.3	0.01662	0.002637	20.92	0.54392	Dy_auto				5	10	28.6625	0.1862	28.177	0.1444	136	111.658	0.72536	109.766	0.562524	1.06341	0.00690819	1.04539	0.00535737	7.93651	15.873	79.3651	0.00269499		0.00929309		0.00589224	1.26809	0.5	0.294491	0.00547345		0.0261905	0.0889348	0.113419	0.584147	0.0643247	0.111085	0.394293
	5.01	0.013287	0.0026524	20.91	0.43486	Dy_auto				5	20	22.5273	0.2435	20.7257	0.4505	10	87.7573	0.948578	80.739	1.75497	0.835784	0.00903408	0.768943	0.016714	7.93651	31.746	79.3651	0.00269499		0.00929309		0.00589224	2.53618	0.25	0.294491	0.0109469		0.0261905	0.0889348	0.050406	0.259608	0.0279989	0.0483526	0.0985733
	3.98	0.0092837	0.0023333	20.91	0.30383	Dy_auto				5	30	19.7851	0.4898	18.7027	0.3077	89	77.0748	1.90806	72.8582	1.19868	0.734046	0.018172	0.693888	0.011416	7.93651	47.619	79.3651	0.00269499		0.00929309		0.00589224	3.80428	0.166667	0.294491	0.0164204		0.0261905	0.0889348	0.0313657	0.161544	0.017212	0.0297242	0.0438103
	3.16	0.0083982	0.0026566	20.9	0.27486	Dy_auto				5	40	15.7962	0.5748	15.0227	0.3812	42	61.5356	2.23919	58.5224	1.485	0.586054	0.0213256	0.557356	0.0141429	7.93651	63.4921	79.3651	0.00269499		0.00929309		0.00589224	5.07237	0.125	0.294491	0.0218938		0.0261905	0.0889348	0.0224015	0.115375	0.0121872	0.0210467	0.0246433
	2.51	0.0070808	0.0028204	20.9	0.23174	Dy_auto				5	50	15.2535	0.5551	14.6535	0.533	40	59.4215	2.16245	57.0841	2.07635	0.565919	0.0205947	0.543659	0.0197748	7.93651	79.3651	79.3651	0.00269499		0.00929309		0.00589224	6.34046	0.1	0.294491	0.0273673		0.0261905	0.0889348	0.0172541	0.0888643	0.00932424	0.0161025	0.0157717
	1.99	0.0047256	0.0023688	20.91	0.15466	Dy_auto				5	60	14.5955	0.7208	13.8933	0.6245	45	56.8582	2.80795	54.1227	2.4328	0.541507	0.0267424	0.515454	0.0231695	7.93651	95.2381	79.3651	0.00269499		0.00929309		0.00589224	7.60855	0.0833333	0.294491	0.0328407		0.0261905	0.0889348	0.0139396	0.0717936	0.00749197	0.0129382	0.0109526
	1.58	0.0053009	0.0033455	20.92	0.17349	Dy_auto				5	70	14.215	1.3405	13.1608	1.2016	230	55.3759	5.22205	51.2692	4.68095	0.52739	0.0497338	0.488278	0.0445805	7.93651	111.111	79.3651	0.00269499		0.00929309		0.00589224	8.87665	0.0714286	0.294491	0.0383142		0.0261905	0.0889348	0.0116392	0.0599457	0.00622673	0.0107532	0.0080468
										5	80	12.0489	1.5704	10.9936	1.412	198	46.9377	6.11765	42.8266	5.50058	0.447025	0.0582633	0.407873	0.0523865	7.93651	126.984	79.3651	0.00269499		0.00929309		0.00589224	10.1447	0.0625	0.294491	0.0437876		0.0261905	0.0889348	0.0099557	0.0512752	0.00530481	0.00916111	0.00616083
										5	90	14.3836	1.3934	13.5583	1.1814	368	56.0327	5.42813	52.8177	4.60226	0.533645	0.0516964	0.503026	0.043831	7.93651	142.857	79.3651	0.00269499		0.00929309		0.00589224	11.4128	0.0555556	0.294491	0.0492611		0.0261905	0.0889348	0.00867408	0.0446744	0.0046056	0.00795362	0.00486782
	Cross Model Viscosity		Interfacial Tension [mN*m]							60	100	136.688	19.9808	59.4921	1.79501	168	532.481	77.8372	231.757	6.99264	5.07125	0.741306	2.20721	0.0665965	95.2381	158.73	952.381	0.00268668		0.00926443		0.0704889	12.6809	0.6	3.54482	0.0547345		0.314286	0.0886606	0.0967056	0.1628	0.0800562	0.0952349	0.0473152
	\eta=0.0027/(1+(0.00033*x)^0.395)		3.63							60	60						0	0	0	0	0	0	0	0	95.2381	95.2381	952.381	0.00268668		0.00926443		0.0704889	7.60855	1	3.54482	0.0328407		0.314286	0.0886606	0.175798	0.29595	0.147779	0.175798	0.131431
										60	80						0	0	0	0	0	0	0	0	95.2381	126.984	952.381	0.00268668		0.00926443		0.0704889	10.1447	0.75	3.54482	0.0437876		0.314286	0.0886606	0.125556	0.211369	0.104637	0.124477	0.07393
										80	100						0	0	0	0	0	0	0	0	126.984	158.73	1269.84	0.00268509		0.00925893		0.0939295	12.6809	0.8	4.72923	0.0547345		0.419048	0.088608	0.129685	0.19181	0.113063	0.12882	0.0630869

## Sheet: HA0pt0178
	Rheology
	Shear Rate	Shear Stress	Viscosity	Temperature	Torque	Status		Etching Depth [um]	Width [um]	Qd [ul/min]	Qc [ul/min]	L [pixels]	L_SD [pixels]	H [pixels]	H_SD [pixels]	Frequency [Hz]	L[um]	L_SD[um]	H [um]	H_SD [um]	L/Width	L/width_SD	H/Width	H/Width_SD	U_d [mm/s]	U_c [mm/s]	ShearRate_d [1/s]	Eta_d [Pa*s]	Eta_c [Pa*s]	Alpha=eta_d\eta_c	Interfacial Tension [mN*m]	Ca_d	Ca_c	q=Qd/Qc	Re_d	Re_c	Lambda_s	Wi_d	El_d	Ca^-0.6*q^0.57*Wid^0.45	Ca^-0.6*q^0.57}	(q*Wid/Ca_c)^0.6	(q/Ca_c)^0.6*Wi_d^0.45	q/Ca_c
								100	105	10	100	28.2087	1.1789	26.9339	1.0169	488	109.89	4.59252	104.924	3.96143	1.04657	0.0437383	0.999273	0.0377279	15.873	158.73	158.73	0.00259114	0.29	0.00893497	3.63	0.0113304	12.6809	0.1	0.612588	0.0547345	0.00112641	0.178795	0.291869	0.027019	0.0586286	0.019477	0.0252156	0.00788586
	ShearRate_1/s	Shear_Stress_Pa	Viscosity_Pas	Temperature_C	Torque_uNm					10	10	162.487	16.6917	77.5944	1.37692	18	632.984	65.0242	302.277	5.36392	6.02842	0.619278	2.87883	0.0510849	15.873	15.873	158.73	0.00259114		0.00893497		0.0113304	1.26809	1	0.612588	0.00547345		0.178795	0.291869	0.399641	0.867181	0.30869	0.399641	0.788586
	1000	1.9394	0.0019384	20.97	63.472					10	20	83.5207	3.5517	69.2396	1.0711	38	325.363	13.836	269.73	4.17257	3.0987	0.131771	2.56885	0.0397388	15.873	31.746	158.73	0.00259114		0.00893497		0.0113304	2.53618	0.5	0.612588	0.0109469		0.178795	0.291869	0.177609	0.385394	0.134365	0.173954	0.197147
	790	1.597	0.0020215	20.97	52.266					10	30	59.3995	2.3711	54.0183	1.8607	74	231.397	9.23685	210.434	7.24854	2.20378	0.08797	2.00413	0.0690337	15.873	47.619	158.73	0.00259114		0.00893497		0.0113304	3.80428	0.333333	0.612588	0.0164204		0.178795	0.291869	0.110519	0.239816	0.0825995	0.106936	0.0876207
	628	1.3154	0.0020957	20.97	43.049					10	40	54.1634	2.8727	49.2052	2.4577	100	210.999	11.1909	191.684	9.57421	2.00951	0.10658	1.82556	0.091183	15.873	63.4921	158.73	0.00259114		0.00893497		0.0113304	5.07237	0.25	0.612588	0.0218938		0.178795	0.291869	0.0789332	0.171277	0.0584859	0.0757177	0.0492866
	499	1.0835	0.0021734	20.97	35.462					10	50	39.3739	1.6612	36.3223	1.4271	86	153.385	6.47137	141.497	5.55941	1.46081	0.0616321	1.34759	0.0529467	15.873	79.3651	158.73	0.00259114		0.00893497		0.0113304	6.34046	0.2	0.612588	0.0273673		0.178795	0.291869	0.060796	0.131921	0.0447465	0.0579303	0.0315434
	396	0.8953	0.0022608	20.97	29.301					10	60	37.1903	1.9616	34.4254	1.7109	204	144.878	7.6416	134.108	6.66498	1.37979	0.0727772	1.27721	0.063476	15.873	95.2381	158.73	0.00259114		0.00893497		0.0113304	7.60855	0.166667	0.612588	0.0328407		0.178795	0.291869	0.0491171	0.106579	0.0359535	0.0465466	0.0219052
	315	0.73713	0.0023434	20.98	24.125					10	70	31.4693	1.593	29.6494	1.3633	296	122.592	6.20569	115.502	5.31087	1.16754	0.0591018	1.10002	0.0505797	15.873	111.111	158.73	0.00259114		0.00893497		0.0113304	8.87665	0.142857	0.612588	0.0383142		0.178795	0.291869	0.0410114	0.0889907	0.0298817	0.0386858	0.0160936
	250	0.60545	0.0024232	20.97	19.815					10	80	28.0691	1.1082	26.9933	1.1853	384	109.346	4.3171	105.155	4.61745	1.04139	0.0411153	1.00148	0.0439757	15.873	126.984	158.73	0.00259114		0.00893497		0.0113304	10.1447	0.125	0.612588	0.0437876		0.178795	0.291869	0.0350796	0.0761192	0.0254575	0.0329581	0.0123217
	198	0.49723	0.0025053	20.97	16.273					10	90	28.8511	1.3594	27.5898	1.3154	416	112.392	5.29568	107.479	5.12427	1.0704	0.050435	1.02361	0.0488026	15.873	142.857	158.73	0.00259114		0.00893497		0.0113304	11.4128	0.111111	0.612588	0.0492611		0.178795	0.291869	0.0305637	0.0663202	0.022102	0.028614	0.00973563
	158	0.40772	0.0025862	20.97	13.344					10	100	52.3856	1.7161	46.3775	3.6143	312	204.073	6.68524	180.668	14.0799	1.94355	0.0636689	1.72065	0.134094	15.873	158.73	158.73	0.00259114		0.00893497		0.0113304	12.6809	0.1	0.612588	0.0547345		0.178795	0.291869	0.027019	0.0586286	0.019477	0.0252156	0.00788586
	125	0.33503	0.0026754	20.97	10.965					20	20	159.073	85.7614	68.0873	11.3628	32	619.684	334.092	265.241	44.2649	5.90175	3.18183	2.5261	0.42157	31.746	31.746	317.46	0.00234797		0.00809646		0.0205341	2.53618	1	1.35206	0.0109469		0.35759	0.264478	0.360176	0.572126	0.30869	0.360176	0.394293
	99.5	0.27223	0.0027368	20.98	8.9096					20	40	71.3798	4.1225	61.8621	2.4263	54	278.067	16.0596	240.99	9.45189	2.64826	0.152949	2.29514	0.090018	31.746	63.4921	317.46	0.00234797		0.00809646		0.0205341	5.07237	0.5	1.35206	0.0218938		0.35759	0.264478	0.16007	0.254265	0.134365	0.156776	0.0985733
	79	0.22185	0.0028078	20.98	7.2608					20	60	66.38	4.7854	58.4402	3.3837	72	258.59	18.642	227.66	13.1815	2.46276	0.177543	2.16819	0.125538	31.746	95.2381	317.46	0.00234797		0.00809646		0.0205341	7.60855	0.333333	1.35206	0.0328407		0.35759	0.264478	0.0996055	0.158219	0.0825995	0.0963762	0.0438103
	62.8	0.1814	0.0028903	20.98	5.9368					20	80	56.388	3.3473	50.2932	2.9196	216	219.665	13.0397	195.922	11.3736	2.09205	0.124188	1.86592	0.10832	31.746	126.984	317.46	0.00234797		0.00809646		0.0205341	10.1447	0.25	1.35206	0.0437876		0.35759	0.264478	0.0711385	0.113001	0.0584859	0.0682407	0.0246433
	50	0.14781	0.0029572	20.98	4.8376					40	100	93.7944	40.1625	58.7356	8.06455	200	365.385	156.457	228.81	31.4162	3.47986	1.49007	2.17915	0.299202	63.4921	158.73	634.921	0.00209203		0.00721388		0.0365915	12.6809	0.4	3.03496	0.0547345		0.715181	0.235648	0.111115	0.129206	0.1028	0.108102	0.0315434
	39.6	0.11915	0.0030096	20.98	3.8996					40	40						0	0	0	0	0	0	0	0	63.4921	63.4921	634.921	0.00209203		0.00721388		0.0365915	5.07237	1	3.03496	0.0218938		0.715181	0.235648	0.324609	0.377462	0.30869	0.324609	0.197147
	31.5	0.097018	0.0030841	20.98	3.1752					40	60					24	0	0	0	0	0	0	0	0	63.4921	95.2381	634.921	0.00209203		0.00721388		0.0365915	7.60855	0.666667	3.03496	0.0328407		0.715181	0.235648	0.201992	0.23488	0.189764	0.19955	0.0876207
	25	0.078514	0.0031423	20.98	2.5696					40	80	133.645	15.9349	64.2141	0.1675	120	520.626	62.076	250.152	0.652513	4.95834	0.5912	2.3824	0.00621441	63.4921	126.984	634.921	0.00209203		0.00721388		0.0365915	10.1447	0.5	3.03496	0.0437876		0.715181	0.235648	0.144263	0.167752	0.134365	0.141294	0.0492866
	19.8	0.063912	0.0032201	20.98	2.0917					5	10	70.0631	3.6029	52.2028	13.195	21	272.938	14.0354	203.361	51.4024	2.59941	0.133671	1.93677	0.489547	7.93651	15.873	79.3651	0.00281475		0.00970603		0.00615407	1.26809	0.5	0.281961	0.00547345		0.0893976	0.317056	0.197069	0.584147	0.134365	0.193014	0.394293
	15.8	0.051791	0.003285	20.98	1.695					5	20	54.7681	2.2241	49.51	7.3038	84	213.354	8.6642	192.871	28.4527	2.03195	0.0825162	1.83687	0.270978	7.93651	31.746	79.3651	0.00281475		0.00970603		0.00615407	2.53618	0.25	0.281961	0.0109469		0.0893976	0.317056	0.0875818	0.259608	0.0584859	0.0840141	0.0985733
	12.6	0.04085	0.0032494	20.98	1.3369					5	30	20.7667	0.658	19.4117	0.2694	164	80.8987	2.5633	75.6202	1.04947	0.770464	0.0244124	0.720192	0.00999499	7.93651	47.619	79.3651	0.00281475		0.00970603		0.00615407	3.80428	0.166667	0.281961	0.0164204		0.0893976	0.317056	0.0544988	0.161544	0.0359535	0.0516467	0.0438103
	9.94	0.033201	0.0033389	20.98	1.0866					5	40	17.5823	0.3623	16.6546	0.3138	63	68.4936	1.41138	64.8796	1.22244	0.65232	0.0134417	0.617901	0.0116423	7.93651	63.4921	79.3651	0.00281475		0.00970603		0.00615407	5.07237	0.125	0.281961	0.0218938		0.0893976	0.317056	0.0389232	0.115375	0.0254575	0.0365693	0.0246433
	7.92	0.026434	0.0033364	20.99	0.86511					5	50	14.9906	0.3877	13.8136	0.3886	500	58.3974	1.51032	53.8122	1.51383	0.556165	0.014384	0.512497	0.0144174	7.93651	79.3651	79.3651	0.00281475		0.00970603		0.00615407	6.34046	0.1	0.281961	0.0273673		0.0893976	0.317056	0.0299795	0.0888643	0.019477	0.0279785	0.0157717
	6.3	0.021556	0.003421	20.99	0.70549					5	60	24.506	0.8071	23.4512	0.8174	284	95.4655	3.14414	91.3564	3.18426	0.909195	0.0299442	0.870061	0.0303263	7.93651	95.2381	79.3651	0.00281475		0.00970603		0.00615407	7.60855	0.0833333	0.281961	0.0328407		0.0893976	0.317056	0.0242204	0.0717936	0.0156497	0.0224805	0.0109526
	4.98	0.017765	0.0035647	20.99	0.5814					5	70	24.1882	0.5382	22.2494	0.8467	460	94.2275	2.09661	86.6747	3.2984	0.897405	0.0199677	0.825474	0.0314134	7.93651	111.111	79.3651	0.00281475		0.00970603		0.00615407	8.87665	0.0714286	0.281961	0.0383142		0.0893976	0.317056	0.0202234	0.0599457	0.0130068	0.018684	0.0080468
	3.97	0.014142	0.0035579	20.99	0.46282					5	80	23.5183	1.4576	21.1617	1.7822	576	91.6178	5.67822	82.4375	6.94273	0.872551	0.0540783	0.785119	0.0661213	7.93651	126.984	79.3651	0.00281475		0.00970603		0.00615407	10.1447	0.0625	0.281961	0.0437876		0.0893976	0.317056	0.0172983	0.0512752	0.011081	0.0159177	0.00616083
	3.16	0.011812	0.003742	20.99	0.38658					5	90	10.6005	0.4459	8.2985	1.028		41.2953	1.73705	32.3276	4.00467	0.393288	0.0165433	0.307882	0.0381398	7.93651	142.857	79.3651	0.00281475		0.00970603		0.00615407	11.4128	0.0555556	0.281961	0.0492611		0.0893976	0.317056	0.0150715	0.0446744	0.00962047	0.0138197	0.00486782
	2.51	0.010794	0.0042991	21	0.35327					5	100	29.2859	1.1766	28.4567	1.1606	336	114.086	4.58356	110.856	4.52123	1.08653	0.043653	1.05577	0.0430593	7.93651	158.73	79.3651	0.00281475		0.00970603		0.00615407	12.6809	0.05	0.281961	0.0547345		0.0893976	0.317056	0.0133235	0.0394932	0.00847788	0.0121783	0.00394293
	1.99	0.0066403	0.0033364	21	0.21732
	1.58	0.0062111	0.0039214	21	0.20328
	1.26	0.006114	0.0048576	21.01	0.2001
	1	0.0050577	0.0050583	21.03	0.16553
	\eta=0.00393225/(1 + (0.00112641*x)^0.382571)		3.63

## Sheet: HA0pt0316
	Rheology
	Shear Rate	Shear Stress	Viscosity	Temperature	Torque	Status		Etching Depth [um]	Width [um]	Qd [ul/min]	Qc [ul/min]	L [pixels]	L_SD [pixels]	H [pixels]	H_SD [pixels]	Frequency [Hz]	L[um]	L_SD[um]	H [um]	H_SD [um]	L/Width	L/width_SD	H/Width	H/Width_SD	U_d [mm/s]	U_c [mm/s]	ShearRate_d [1/s]	Eta_d [Pa*s]	Eta_c [Pa*s]	Alpha=eta_d\eta_c	Interfacial Tension [mN*m]	Ca_d	Ca_c	q=Qd/Qc	Re_d	Re_c	Lambda_s	Wi_d	El_d	Ca^-0.6*q^0.57*Wid^0.45	Ca^-0.6*q^0.57}	(q*Wid/Ca_c)^0.6	(q/Ca_c)^0.6*Wi_d^0.45	q/Ca_c
								100	105	10	100	26.4642	0.9417	24.8927	1.1185	552	103.094	3.66848	96.972	4.35723	0.981847	0.0349379	0.923542	0.0414974	15.873	158.73	158.73	0.00647888	0.29	0.022341	3.63	0.0283304	12.6809	0.1	0.244996	0.0547345	0.0019	0.301587	1.23099	0.0341858	0.0586286	0.0266537	0.031904	0.00788586
	[1/s]	[Pa]	[Pa·s]	[°C]	[µN·m]					10	10	113.098	3.57636	73.992	1.64305	22	440.586	13.9321	288.243	6.40068	4.19605	0.132686	2.74517	0.0609589	15.873	15.873	158.73	0.00647888		0.022341		0.0283304	1.26809	1	0.244996	0.00547345		0.301587	1.23099	0.505645	0.867181	0.422433	0.505645	0.788586
	1000	2.8482	0.0028467	20.91	93.214	Dy_auto				10	20	81.7078	4.95475	68.2934	2.32025	40	318.301	19.3017	266.044	9.03878	3.03143	0.183826	2.53375	0.0860836	15.873	31.746	158.73	0.00647888		0.022341		0.0283304	2.53618	0.5	0.244996	0.0109469		0.301587	1.23099	0.224719	0.385394	0.183874	0.220095	0.197147
	790	2.3944	0.0030306	20.91	78.363	Dy_auto				10	30	58.2413	2.90555	52.6999	2.18283	78	226.884	11.3189	205.298	8.50342	2.1608	0.107799	1.95521	0.080985	15.873	47.619	158.73	0.00647888		0.022341		0.0283304	3.80428	0.333333	0.244996	0.0164204		0.301587	1.23099	0.139834	0.239816	0.113035	0.135301	0.0876207
	628	2.0152	0.0032107	20.91	65.953	Dy_auto				10	40	50.1993	1.6673	46.6249	2.1576	116	195.556	6.49513	181.632	8.40514	1.86244	0.0618584	1.72983	0.080049	15.873	63.4921	158.73	0.00647888		0.022341		0.0283304	5.07237	0.25	0.244996	0.0218938		0.301587	1.23099	0.09987	0.171277	0.080036	0.0958017	0.0492866
	499	1.6934	0.0033965	20.91	55.42	Dy_auto				10	50	39.2817	0.6839	34.3666	4.3296	184	153.026	2.6642	133.878	16.8664	1.45739	0.0253733	1.27503	0.160632	15.873	79.3651	158.73	0.00647888		0.022341		0.0283304	6.34046	0.2	0.244996	0.0273673		0.301587	1.23099	0.076922	0.131921	0.0612341	0.0732962	0.0315434
	396	1.4239	0.0035955	20.91	46.6	Dy_auto				10	60	34.9957	1.4246	33.1658	1.6179	244	136.329	5.54967	129.201	6.30269	1.29837	0.052854	1.23048	0.0600256	15.873	95.2381	158.73	0.00647888		0.022341		0.0283304	7.60855	0.166667	0.244996	0.0328407		0.301587	1.23099	0.0621453	0.106579	0.0492012	0.058893	0.0219052
	315	1.1943	0.0037969	20.91	39.088	Dy_auto				10	70	36.059	1.2152	29.7075	5.5833	304	140.471	4.73393	115.728	21.7503	1.33782	0.0450851	1.10218	0.207146	15.873	111.111	158.73	0.00647888		0.022341		0.0283304	8.87665	0.142857	0.244996	0.0383142		0.301587	1.23099	0.0518896	0.0889907	0.0408921	0.0489472	0.0160936
	250	0.99963	0.0040007	20.9	32.716	Dy_auto				10	80	27.9944	1.3383	22.3487	4.7023	400	109.055	5.21348	87.0616	18.3183	1.03862	0.0496522	0.829158	0.17446	15.873	126.984	158.73	0.00647888		0.022341		0.0283304	10.1447	0.125	0.244996	0.0437876		0.301587	1.23099	0.0443844	0.0761192	0.0348377	0.0417001	0.0123217
	198	0.83483	0.0042062	20.9	27.322	Dy_auto				10	90	33.1155	2.1671	26.5709	5.3209	400	129.005	8.44215	103.51	20.7281	1.22862	0.0804014	0.985805	0.19741	15.873	142.857	158.73	0.00647888		0.022341		0.0283304	11.4128	0.111111	0.244996	0.0492611		0.301587	1.23099	0.0386707	0.0663202	0.0302459	0.0362038	0.00973563
	158	0.69719	0.0044223	20.9	22.818	Dy_auto				20	100	41.1744	2.9944	38.2562	2.8176	360	160.399	11.665	149.031	10.9762	1.52761	0.111095	1.41934	0.104536	31.746	158.73	317.46	0.00637691		0.0219893		0.055769	12.6809	0.2	0.497828	0.0547345		0.603175	1.21161	0.069326	0.0870355	0.0612341	0.0660582	0.0157717
	125	0.58124	0.0046414	20.9	19.023	Dy_auto				20	20	112.679	56.5429	66.5845	23.4043	168	438.954	220.268	259.386	91.1739	4.18051	2.09779	2.47035	0.868322	31.746	31.746	317.46	0.00637691		0.0219893		0.055769	2.53618	1	0.497828	0.0109469		0.603175	1.21161	0.455712	0.572126	0.422433	0.455712	0.394293
	99.5	0.48014	0.0048268	20.9	15.714	Dy_auto				20	30	93.5567	32.2169	64.5247	10.4934	62	364.459	125.504	251.362	40.878	3.47104	1.19528	2.39393	0.389315	31.746	47.619	317.46	0.00637691		0.0219893		0.055769	3.80428	0.666667	0.497828	0.0164204		0.603175	1.21161	0.283572	0.356012	0.259686	0.280144	0.175241
	79	0.39628	0.0050152	20.9	12.969	Dy_auto				20	40	94.2589	8.6773	67.54	0.837	94	367.195	33.8033	263.109	3.26062	3.49709	0.321936	2.5058	0.0310535	31.746	63.4921	317.46	0.00637691		0.0219893		0.055769	5.07237	0.5	0.497828	0.0218938		0.603175	1.21161	0.202528	0.254265	0.183874	0.19836	0.0985733
	62.8	0.32556	0.005187	20.9	10.655	Dy_auto				20	50	70.3223	5.8067	58.3384	9.2471	128	273.947	22.6206	227.263	36.023	2.60902	0.215434	2.16441	0.343076	31.746	79.3651	317.46	0.00637691		0.0219893		0.055769	6.34046	0.4	0.497828	0.0273673		0.603175	1.21161	0.155992	0.19584	0.140679	0.151762	0.0630869
	49.9	0.26674	0.0053503	20.9	8.7299	Dy_auto				20	60	58.8463	2.7118	52.8718	3.647	164	229.242	10.5641	205.967	14.2072	2.18325	0.10061	1.96159	0.135307	31.746	95.2381	317.46	0.00637691		0.0219893		0.055769	7.60855	0.333333	0.497828	0.0328407		0.603175	1.21161	0.126026	0.158219	0.113035	0.12194	0.0438103
	39.6	0.21833	0.0055132	20.89	7.1456	Dy_auto				20	70	60.15	3.4495	54.3909	3.2174	204	234.32	13.4379	211.885	12.5337	2.23162	0.12798	2.01795	0.119369	31.746	111.111	317.46	0.00637691		0.0219893		0.055769	8.87665	0.285714	0.497828	0.0383142		0.603175	1.21161	0.105228	0.132109	0.0939454	0.101347	0.0321872
	31.5	0.17933	0.0057008	20.89	5.8692	Dy_auto				20	80	52.1648	2.0251	43.9276	6.9045	256	203.213	7.88898	171.124	26.8972	1.93536	0.0751331	1.62975	0.256163	31.746	126.984	317.46	0.00637691		0.0219893		0.055769	10.1447	0.25	0.497828	0.0437876		0.603175	1.21161	0.0900079	0.113001	0.080036	0.0863414	0.0246433
	25	0.14391	0.0057594	20.89	4.71	Dy_auto				20	90	50.6088	3.5645	42.0881	8.1655	312	197.152	13.8859	163.958	31.8095	1.87763	0.132246	1.56151	0.302948	31.746	142.857	317.46	0.00637691		0.0219893		0.055769	11.4128	0.222222	0.497828	0.0492611		0.603175	1.21161	0.078421	0.0984539	0.0694868	0.0749611	0.0194713
	19.8	0.11695	0.005892	20.89	3.8274	Dy_auto				40	100	57.6667	1.96638	108.5	27.2378	136	224.646	7.66024	422.672	106.108	2.13949	0.0729547	4.02545	1.01055	63.4921	158.73	634.921	0.00623131		0.0214873		0.108991	12.6809	0.4	1.01892	0.0547345		1.20635	1.18395	0.140587	0.129206	0.140679	0.136776	0.0315434
	15.8	0.093823	0.0059506	20.89	3.0706	Dy_auto				40	40	64.5	1.73205	250	49.3491	24	251.266	6.74737	973.899	192.244	2.39301	0.0642607	9.27523	1.8309	63.4921	63.4921	634.921	0.00623131		0.0214873		0.108991	5.07237	1	1.01892	0.0218938		1.20635	1.18395	0.410711	0.377462	0.422433	0.410711	0.197147
	12.5	0.075766	0.0060497	20.89	2.4797	Dy_auto				40	60						0	0	0	0	0	0	0	0	63.4921	95.2381	634.921	0.00623131		0.0214873		0.108991	7.60855	0.666667	1.01892	0.0328407		1.20635	1.18395	0.25557	0.23488	0.259686	0.25248	0.0876207
	9.98	0.060515	0.0060623	20.89	1.9805	Dy_auto				40	80	143.167	59.6302	59.5	2.42899	56	557.72	232.295	231.788	9.46238	5.31162	2.21234	2.20751	0.0901179	63.4921	126.984	634.921	0.00623131		0.0214873		0.108991	10.1447	0.5	1.01892	0.0437876		1.20635	1.18395	0.182529	0.167752	0.183874	0.178772	0.0492866
	7.9	0.048727	0.0061662	20.88	1.5947	Dy_auto				5	100	15.6667	3.20417	15.3334	4.30891	752	61.0312	12.4822	59.7326	16.7858	0.581249	0.118878	0.568882	0.159864	7.93651	158.73	79.3651	0.00654943		0.0225842		0.0143194	12.6809	0.05	0.121179	0.0547345		0.150794	1.24439	0.0168576	0.0394932	0.0116017	0.0154086	0.00394293
	6.29	0.039245	0.006236	20.89	1.2844	Dy_auto				5	10	59.6779	6.4001	51.3245	9.5155	33	232.481	24.9322	199.94	37.0686	2.21411	0.23745	1.90419	0.353034	7.93651	15.873	79.3651	0.00654943		0.0225842		0.0143194	1.26809	0.5	0.121179	0.00547345		0.150794	1.24439	0.249342	0.584147	0.183874	0.24421	0.394293
	5.01	0.030506	0.0060931	20.88	0.99838	Dy_auto				5	20	36.8499	3.3082	28.35	7.0383	138	143.552	12.8874	110.44	27.4184	1.36717	0.122737	1.05181	0.261127	7.93651	31.746	79.3651	0.00654943		0.0225842		0.0143194	2.53618	0.25	0.121179	0.0109469		0.150794	1.24439	0.110813	0.259608	0.080036	0.106299	0.0985733
	3.96	0.024643	0.0062208	20.88	0.80651	Dy_auto				5	30	18.2267	0.4725	16.8991	0.2938	140	71.0039	1.84067	65.8321	1.14453	0.676228	0.0175302	0.626972	0.0109003	7.93651	47.619	79.3651	0.00654943		0.0225842		0.0143194	3.80428	0.166667	0.121179	0.0164204		0.150794	1.24439	0.0689545	0.161544	0.0492012	0.0653459	0.0438103
	3.16	0.019787	0.0062633	20.88	0.64757	Dy_auto				5	40	17.9	0.3019	16.6729	0.2511	194	69.7312	1.17608	64.9509	0.978185	0.664107	0.0112008	0.61858	0.00931604	7.93651	63.4921	79.3651	0.00654943		0.0225842		0.0143194	5.07237	0.125	0.121179	0.0218938		0.150794	1.24439	0.0492475	0.115375	0.0348377	0.0462692	0.0246433
	2.51	0.015625	0.0062261	20.88	0.51136	Dy_auto				5	50	27.7948	1.647	25.7504	2.0812	244	108.277	6.41605	100.313	8.10752	1.03121	0.0611052	0.955364	0.0772145	7.93651	79.3651	79.3651	0.00654943		0.0225842		0.0143194	6.34046	0.1	0.121179	0.0273673		0.150794	1.24439	0.0379315	0.0888643	0.0266537	0.0353997	0.0157717
	1.99	0.015377	0.0077105	20.87	0.50324	Dy_auto				5	60	27.1958	1.7699	21.7231	5.0314	272	105.944	6.89482	84.6245	19.6003	1.00899	0.0656649	0.805947	0.18667	7.93651	95.2381	79.3651	0.00654943		0.0225842		0.0143194	7.60855	0.0833333	0.121179	0.0328407		0.150794	1.24439	0.0306449	0.0717936	0.0214161	0.0284435	0.0109526
	1.58	0.010288	0.0064933	20.88	0.33671	Dy_auto				5	70	32.7568	1.7343	23.9415	1.9997	432	127.607	6.75614	93.2665	7.79003	1.21531	0.0643441	0.888252	0.0741907	7.93651	111.111	79.3651	0.00654943		0.0225842		0.0143194	8.87665	0.0714286	0.121179	0.0383142		0.150794	1.24439	0.0255876	0.0599457	0.0177993	0.0236399	0.0080468
	1.26	0.0083602	0.0066427	20.88	0.27361	Dy_auto				5	80	20.0286	1.118	15.3914	3.8677	588	78.0234	4.35528	59.9587	15.067	0.74308	0.0414788	0.571035	0.143495	7.93651	126.984	79.3651	0.00654943		0.0225842		0.0143194	10.1447	0.0625	0.121179	0.0437876		0.150794	1.24439	0.0218867	0.0512752	0.015164	0.0201398	0.00616083
	1	0.0067092	0.0067104	20.9	0.21958	Dy_auto				5	90	21.836	2.1086	21.2171	2.1185	568	85.0643	8.21426	82.6533	8.25282	0.810136	0.078231	0.787174	0.0785983	7.93651	142.857	79.3651	0.00654943		0.0225842		0.0143194	11.4128	0.0555556	0.121179	0.0492611		0.150794	1.24439	0.0190691	0.0446744	0.0131653	0.0174853	0.00486782
	Cross Model Viscosity		Interfacial Tension [mN*m]
	\eta=0.0067/(1+(0.0019*x)^0.57)		3.63

## Sheet: HA0pt1
	Rheology
	Shear Rate	Shear Stress	Viscosity	Temperature	Torque	Status		Etching Depth [um]	Width [um]	Qd [ul/min]	Qc [ul/min]	L [pixels]	L_SD [pixels]	H [pixels]	H_SD [pixels]	Frequency [Hz]	L[um]	L_SD[um]	H [um]	H_SD [um]	L/Width	L/width_SD	H/Width	H/Width_SD	U_d [mm/s]	U_c [mm/s]	ShearRate_d [1/s]	Eta_d [Pa*s]	Eta_c [Pa*s]	Alpha=eta_d\eta_c	Interfacial Tension [mN*m]	Ca_d	Ca_c	q=Qd/Qc	Re_d	Re_c	Lambda_s	Wi_d	El_d	Ca^-0.6*q^0.57*Wid^0.45	Ca^-0.6*q^0.57}	(q*Wid/Ca_c)^0.6	(q/Ca_c)^0.6*Wi_d^0.45	q/Ca_c
								100	105	10	100	28.399	0.8181	26.4398	0.4587	520	110.631	3.18699	102.999	1.78691	1.05363	0.0303523	0.980941	0.0170182	15.873	158.73	158.73	0.0174101	0.29	0.0600347	3.63	0.0761296	12.6809	0.1	0.0911715	0.0547345	0.0115	1.8254	20.0216	0.0768635	0.0586286	0.0785098	0.0717332	0.00788586
	[1/s]	[Pa]	[Pa·s]	[°C]	[µN·m]					10	10	170.986	25.46	74.4136	3.23666	14	666.094	99.1818	289.886	12.6087	6.34375	0.944589	2.76082	0.120083	15.873	15.873	158.73	0.0174101		0.0600347		0.0761296	1.26809	1	0.0911715	0.00547345		1.8254	20.0216	1.13689	0.867181	1.2443	1.13689	0.788586
	ShearRate_1/s	Shear_Stress_Pa	Viscosity_Pas	Temperature_C	Torque_uNm					10	20	84.8081	22.6928	61.2276	10.7268	34	330.378	88.402	238.518	41.7873	3.14646	0.841924	2.2716	0.397974	15.873	31.746	158.73	0.0174101		0.0600347		0.0761296	2.53618	0.5	0.0911715	0.0109469		1.8254	20.0216	0.50526	0.385394	0.541612	0.494862	0.197147
	1000	7.8514	0.0078473	20.87	256.96					10	30	63.5393	2.9843	57.3071	2.8606	62	247.524	11.6256	223.245	11.1437	2.35737	0.11072	2.12615	0.106131	15.873	47.619	158.73	0.0174101		0.0600347		0.0761296	3.80428	0.333333	0.0911715	0.0164204		1.8254	20.0216	0.314404	0.239816	0.33295	0.304211	0.0876207
	790	6.8917	0.0087193	20.87	225.55					10	40	57.797	3.8159	52.3973	1.8501	100	225.154	14.8652	204.119	7.20725	2.14432	0.141573	1.94399	0.0686404	15.873	63.4921	158.73	0.0174101		0.0600347		0.0761296	5.07237	0.25	0.0911715	0.0218938		1.8254	20.0216	0.224548	0.171277	0.23575	0.215401	0.0492866
	628	6.0467	0.009633	20.86	197.9					10	50	48.011	0.9869	44.6496	0.8649	120	187.032	3.84457	173.937	3.3693	1.78125	0.0366149	1.65654	0.0320886	15.873	79.3651	158.73	0.0174101		0.0600347		0.0761296	6.34046	0.2	0.0911715	0.0273673		1.8254	20.0216	0.172952	0.131921	0.180368	0.1648	0.0315434
	499	5.3033	0.010636	20.86	173.57					10	60	39.0627	1.414	36.6288	1.2901	168	152.173	5.50838	142.691	5.02571	1.44926	0.0524607	1.35896	0.0478639	15.873	95.2381	158.73	0.0174101		0.0600347		0.0761296	7.60855	0.166667	0.0911715	0.0328407		1.8254	20.0216	0.139728	0.106579	0.144925	0.132415	0.0219052
	396	4.6442	0.011726	20.86	151.99					10	70	39.7536	2.3771	36.6167	2.4295	204	154.864	9.26023	142.644	9.46436	1.4749	0.0881926	1.35851	0.0901367	15.873	111.111	158.73	0.0174101		0.0600347		0.0761296	8.87665	0.142857	0.0911715	0.0383142		1.8254	20.0216	0.116669	0.0889907	0.12045	0.110053	0.0160936
	315	4.0597	0.012904	20.86	132.87					10	80	37.3035	1.0311	34.7163	0.9059	256	145.319	4.01675	135.241	3.52902	1.38399	0.0382548	1.28801	0.0336097	15.873	126.984	158.73	0.0174101		0.0600347		0.0761296	10.1447	0.125	0.0911715	0.0437876		1.8254	20.0216	0.0997941	0.0761192	0.102616	0.0937589	0.0123217
	250	3.5427	0.014176	20.86	115.94					10	90	37.3413	0.4715	34.5218	0.3617	304	145.467	1.83677	134.483	1.40904	1.3854	0.0174931	1.28079	0.0134194	15.873	142.857	158.73	0.0174101		0.0600347		0.0761296	11.4128	0.111111	0.0911715	0.0492611		1.8254	20.0216	0.0869474	0.0663202	0.0890908	0.0814009	0.00973563
	199	3.0864	0.015548	20.86	101.01					10	100	48.2028	1.7016	40.4277	0.7034	272	187.779	6.62875	157.49	2.74016	1.78837	0.0631309	1.49991	0.0260968	15.873	158.73	158.73	0.0174101		0.0600347		0.0761296	12.6809	0.1	0.0911715	0.0547345		1.8254	20.0216	0.0768635	0.0586286	0.0785098	0.0717332	0.00788586
	158	2.6784	0.016985	20.86	87.657					20	20	128.393	5.6606	69.0794	4.1789	38	500.166	22.0514	269.106	16.2793	4.76348	0.210014	2.56291	0.155041	31.746	31.746	317.46	0.013068		0.045062		0.114285	2.53618	1	0.24293	0.0109469		3.65079	15.0282	1.02463	0.572126	1.2443	1.02463	0.394293
	125	2.3171	0.018498	20.86	75.834					20	40						0	0	0	0	0	0	0	0	31.746	63.4921	317.46	0.013068		0.045062		0.114285	5.07237	0.5	0.24293	0.0218938		3.65079	15.0282	0.455366	0.254265	0.541612	0.445995	0.0985733
	99.5	1.997	0.02007	20.86	65.357					20	60	73.8714	8.72599	58.375	2.76887	96	287.773	33.9929	227.406	10.7864	2.7407	0.323742	2.16577	0.102728	31.746	95.2381	317.46	0.013068		0.045062		0.114285	7.60855	0.333333	0.24293	0.0328407		3.65079	15.0282	0.283357	0.158219	0.33295	0.27417	0.0438103
	79	1.714	0.021684	20.86	56.094					20	80	56.8333	7.3598	49.1667	6.79461	160	221.4	28.6708	191.534	26.4691	2.10857	0.273055	1.82413	0.252086	31.746	126.984	317.46	0.013068		0.045062		0.114285	10.1447	0.25	0.24293	0.0437876		3.65079	15.0282	0.202374	0.113001	0.23575	0.194131	0.0246433
	62.8	1.4649	0.023331	20.86	47.943					40	100						0	0	0	0	0	0	0	0	63.4921	158.73	634.921	0.00941056		0.0324502		0.164599	12.6809	0.4	0.674689	0.0547345		7.30159	10.8221	0.316098	0.129206	0.414377	0.307527	0.0315434
	49.9	1.2456	0.024973	20.86	40.765					40	200						0	0	0	0	0	0	0	0	63.4921	317.46	634.921	0.00941056		0.0324502		0.164599	25.3618	0.2	0.674689	0.109469		7.30159	10.8221	0.140481	0.057422	0.180368	0.133859	0.00788586
	39.6	1.0548	0.026624	20.86	34.523					40	40						0	0	0	0	0	0	0	0	63.4921	63.4921	634.921	0.00941056		0.0324502		0.164599	5.07237	1	0.674689	0.0218938		7.30159	10.8221	0.923446	0.377462	1.2443	0.923446	0.197147
	31.5	0.89021	0.028285	20.86	29.135					40	60						0	0	0	0	0	0	0	0	63.4921	95.2381	634.921	0.00941056		0.0324502		0.164599	7.60855	0.666667	0.674689	0.0328407		7.30159	10.8221	0.574625	0.23488	0.764917	0.567678	0.0876207
	25	0.74413	0.029764	20.86	24.354					40	80						0	0	0	0	0	0	0	0	63.4921	126.984	634.921	0.00941056		0.0324502		0.164599	10.1447	0.5	0.674689	0.0437876		7.30159	10.8221	0.410399	0.167752	0.541612	0.401953	0.0492866
	19.9	0.62002	0.031219	20.86	20.292					5	100	18.9512	0.6834	18.2187	0.816	87	73.8263	2.66225	70.9727	3.17881	0.703107	0.0253548	0.675931	0.0302744	7.93651	158.73	79.3651	0.0221283		0.0763045		0.0483806	12.6809	0.05	0.0358659	0.0547345		0.912698	25.4476	0.0379027	0.0394932	0.0341734	0.0346449	0.00394293
	15.8	0.51351	0.032549	20.86	16.806					5	10	74.4225	3.8794	57.3136	11.0142	19	289.92	15.1126	223.271	42.9069	2.76114	0.143929	2.12639	0.408637	7.93651	15.873	79.3651	0.0221283		0.0763045		0.0483806	1.26809	0.5	0.0358659	0.00547345		0.912698	25.4476	0.560621	0.584147	0.541612	0.549084	0.394293
	12.5	0.42286	0.03374	20.86	13.839					5	20	64.1429	13.6678	57.5714	10.8145	32	249.875	53.2444	224.275	42.1287	2.37976	0.507089	2.13595	0.401226	7.93651	31.746	79.3651	0.0221283		0.0763045		0.0483806	2.53618	0.25	0.0358659	0.0109469		0.912698	25.4476	0.249152	0.259608	0.23575	0.239003	0.0985733
	9.96	0.34748	0.034905	20.86	11.372					5	30	47.5658	1.1855	44.9033	3.9819	64	185.297	4.61823	174.925	15.5119	1.76474	0.0439832	1.66595	0.147732	7.93651	47.619	79.3651	0.0221283		0.0763045		0.0483806	3.80428	0.166667	0.0358659	0.0164204		0.912698	25.4476	0.155038	0.161544	0.144925	0.146924	0.0438103
	7.91	0.28349	0.035848	20.86	9.2779					5	40	38.9371	1.6844	37.5513	1.4887	102	151.683	6.56175	146.285	5.79938	1.4446	0.0624928	1.39319	0.0552322	7.93651	63.4921	79.3651	0.0221283		0.0763045		0.0483806	5.07237	0.125	0.0358659	0.0218938		0.912698	25.4476	0.110729	0.115375	0.102616	0.104032	0.0246433
	6.3	0.23282	0.036981	20.86	7.6197					5	50	33.8424	1.1773	32.9326	1.0635	144	131.836	4.58629	128.292	4.14297	1.25558	0.0436789	1.22183	0.0394568	7.93651	79.3651	79.3651	0.0221283		0.0763045		0.0483806	6.34046	0.1	0.0358659	0.0273673		0.912698	25.4476	0.0852854	0.0888643	0.0785098	0.079593	0.0157717
	5	0.18764	0.037521	20.86	6.1412					5	5	186.333	7.9666	71.8333	0.983192	8	725.878	31.0347	279.834	3.83012	6.91313	0.295568	2.66508	0.0364773	7.93651	7.93651	79.3651	0.0221283		0.0763045		0.0483806	0.634046	1	0.0358659	0.00273673		0.912698	25.4476	1.26146	1.3144	1.2443	1.26146	1.57717
	3.97	0.15017	0.037803	20.86	4.9146					5	60	36.5941	0.5393	35.1938	0.4964	168	142.556	2.1009	137.101	1.93377	1.35768	0.0200085	1.30572	0.0184169	7.93651	95.2381	79.3651	0.0221283		0.0763045		0.0483806	7.60855	0.0833333	0.0358659	0.0328407		0.912698	25.4476	0.0689021	0.0717936	0.0630821	0.0639525	0.0109526
	3.16	0.12145	0.038487	20.86	3.9747					5	70	29.1812	0.5083	28.3847	0.2839	69	113.678	1.98013	110.575	1.10596	1.08265	0.0188584	1.0531	0.010533	7.93651	111.111	79.3651	0.0221283		0.0763045		0.0483806	8.87665	0.0714286	0.0358659	0.0383142		0.912698	25.4476	0.0575314	0.0599457	0.0524288	0.0531522	0.0080468
	2.51	0.097164	0.038767	20.86	3.1799					5	80	21.8344	0.8678	21.2119	0.7381	424	85.058	3.3806	82.633	2.87534	0.810077	0.0321962	0.786981	0.0273842	7.93651	126.984	79.3651	0.0221283		0.0763045		0.0483806	10.1447	0.0625	0.0358659	0.0437876		0.912698	25.4476	0.0492101	0.0512752	0.0446663	0.0452825	0.00616083
	1.99	0.077492	0.038925	20.86	2.5361					5	90	24.9487	0.6823	23.9082	0.8059	57	97.1901	2.65797	93.1367	3.13946	0.92562	0.025314	0.887017	0.0298996	7.93651	142.857	79.3651	0.0221283		0.0763045		0.0483806	11.4128	0.0555556	0.0358659	0.0492611		0.912698	25.4476	0.0428752	0.0446744	0.038779	0.039314	0.00486782
	1.58	0.061977	0.039205	20.86	2.0284																																					#DIV/0!
	1.26	0.049536	0.039386	20.86	1.6212
	0.999	0.039948	0.039969	20.86	1.3074
	0.794	0.031412	0.039542	20.86	1.0281
	0.631	0.025173	0.039903	20.87	0.82386
	0.501	0.022495	0.044941	20.87	0.7362
	0.398	0.015909	0.039996	20.87	0.52067
	0.316	0.012406	0.039214	20.88	0.40602
	0.251	0.0099116	0.039454	20.9	0.32438
	0.2	0.0083652	0.041923	20.91	0.27377
	0.158	0.0068682	0.043336	20.94	0.22478
	0.126	0.0050196	0.039856	20.94	0.16428
	0.1	0.0049279	0.049274	20.96	0.16128
	Cross Model Viscosity
	\eta=0.043/(1+(0.0115*x)^0.64)

## Sheet: HA0pt178
	Rheology
	Shear Rate	Shear Stress	Viscosity	Temperature	Torque	Status		Etching Depth [um]	Width [um]	Qd [ul/min]	Qc [ul/min]	L [pixels]	L_SD [pixels]	H [pixels]	H_SD [pixels]	Frequency [Hz]	L[um]	L_SD[um]	H [um]	H_SD [um]	L/Width	L/width_SD	H/Width	H/Width_SD	U_d [mm/s]	U_c [mm/s]	ShearRate_d [1/s]	Eta_d [Pa*s]	Eta_c [Pa*s]	Alpha=eta_d\eta_c	Interfacial Tension [mN*m]	Ca_d	Ca_c	q=Qd/Qc	Re_d	Re_c	Lambda_s	Wi_d	El_d	Ca^-0.6*q^0.57*Wid^0.45	Ca^-0.6*q^0.57}	(q*Wid/Ca_c)^0.6	(q/Ca_c)^0.6*Wi_d^0.45	q/Ca_c
								100	105	10	20	145.779	12.0584	75.4296	0.1719	56	567.897	46.9747	293.843	0.669653	5.40854	0.447378	2.79851	0.00637765	15.873	31.746	158.73	0.0338306	0.29	0.116657	3.63	0.147932	2.53618	0.5	0.0469191	0.0109469	0.0263514	4.18276	89.1483	0.733775	0.385394	0.890741	0.718674	0.197147
	[1/s]	[Pa]	[Pa·s]	[°C]	[µN·m]					10	30	66.6562	17.2037	58.8226	10.2064	54	259.666	67.0188	229.149	39.7601	2.47301	0.638274	2.18237	0.378668	15.873	47.619	158.73	0.0338306		0.116657		0.147932	3.80428	0.333333	0.0469191	0.0164204		4.18276	89.1483	0.4566	0.239816	0.547573	0.441797	0.0876207
	ShearRate_1/s	Shear_Stress_Pa	Viscosity_Pas	Temperature_C	Torque_uNm					10	40	86.5575	4.6317	69.7298	0.82	92	337.193	18.0432	271.639	3.19439	3.21136	0.17184	2.58704	0.0304228	15.873	63.4921	158.73	0.0338306		0.116657		0.147932	5.07237	0.25	0.0469191	0.0218938		4.18276	89.1483	0.326105	0.171277	0.387717	0.312821	0.0492866
	1000	13.427	0.01342	20.94	439.43					10	50	64.2992	4.4488	60.3474	3.5677	124	250.484	17.3307	235.089	13.8983	2.38556	0.165055	2.23894	0.132365	15.873	79.3651	158.73	0.0338306		0.116657		0.147932	6.34046	0.2	0.0469191	0.0273673		4.18276	89.1483	0.251173	0.131921	0.296636	0.239334	0.0315434
	790	11.995	0.015176	20.94	392.58					10	60	46.8809	3.6718	45.3361	3.2747	132	182.629	14.3039	176.611	12.7569	1.73933	0.136227	1.68201	0.121494	15.873	95.2381	158.73	0.0338306		0.116657		0.147932	7.60855	0.166667	0.0469191	0.0328407		4.18276	89.1483	0.202923	0.106579	0.238345	0.192303	0.0219052
	628	10.719	0.017074	20.94	350.8					10	70	39.8559	3.633	38.7826	3.6181	47	155.263	14.1527	151.081	14.0947	1.47869	0.134788	1.43887	0.134235	15.873	111.111	158.73	0.0338306		0.116657		0.147932	8.87665	0.142857	0.0469191	0.0383142		4.18276	89.1483	0.169435	0.0889907	0.198093	0.159827	0.0160936
	499	9.5755	0.019202	20.94	313.38					10	80	55.1289	0.4762	53.1347	0.3691	272	214.76	1.85508	206.991	1.43787	2.04533	0.0176675	1.97135	0.013694	15.873	126.984	158.73	0.0338306		0.116657		0.147932	10.1447	0.125	0.0469191	0.0437876		4.18276	89.1483	0.144928	0.0761192	0.168764	0.136163	0.0123217
	396	8.5472	0.021577	20.94	279.73					10	90	28.8367	1.6597	27.3419	1.976	456	112.336	6.46552	106.513	7.6977	1.06987	0.0615764	1.01441	0.0733114	15.873	142.857	158.73	0.0338306		0.116657		0.147932	11.4128	0.111111	0.0469191	0.0492611		4.18276	89.1483	0.126271	0.0663202	0.14652	0.118216	0.00973563
	315	7.6187	0.024212	20.94	249.34					20	100	48.2299	8.03532	44.8269	7.70014	208	187.884	31.3024	174.628	29.9966	1.78937	0.298118	1.66312	0.285682	31.746	158.73	317.46	0.0232738		0.0802545		0.20354	12.6809	0.2	0.136402	0.0547345		8.36552	61.3297	0.22637	0.0870355	0.296636	0.2157	0.0157717
	250	6.7852	0.027144	20.94	222.06					20	40	131.051	57.2192	65.0637	8.47766	48	510.523	222.903	253.462	33.0255	4.86212	2.12288	2.41392	0.314529	31.746	63.4921	317.46	0.0232738		0.0802545		0.20354	5.07237	0.5	0.136402	0.0218938		8.36552	61.3297	0.661315	0.254265	0.890741	0.647705	0.0985733
	199	6.0255	0.030344	20.94	197.2					20	60	87.5065	4.1747	66.3716	1.509	116	340.89	16.263	258.557	5.87846	3.24657	0.154885	2.46245	0.0559853	31.746	95.2381	317.46	0.0232738		0.0802545		0.20354	7.60855	0.333333	0.136402	0.0328407		8.36552	61.3297	0.411511	0.158219	0.547573	0.398169	0.0438103
	158	5.3399	0.033852	20.94	174.76					20	80	65.1834	5.8113	60.0278	2.0697	172	253.928	22.6385	233.844	8.06272	2.41836	0.215605	2.22709	0.0767878	31.746	126.984	317.46	0.0232738		0.0802545		0.20354	10.1447	0.25	0.136402	0.0437876		8.36552	61.3297	0.293902	0.113001	0.387717	0.28193	0.0246433
	125	4.7144	0.037622	20.93	154.29					40	100						0	0	0	0	0	0	0	0	63.4921	158.73	634.921	0.015456		0.0532965		0.27034	12.6809	0.4	0.410793	0.0547345		16.731	40.7287	0.45906	0.129206	0.68149	0.446613	0.0315434
	99.5	4.1516	0.041705	20.93	135.87					40	80						0	0	0	0	0	0	0	0	63.4921	126.984	634.921	0.015456		0.0532965		0.27034	10.1447	0.5	0.410793	0.0437876		16.731	40.7287	0.59601	0.167752	0.890741	0.583745	0.0492866
	79.1	3.6437	0.046076	20.93	119.25					5	10	117.868	45.7562	72.3969	3.98975	11	459.167	178.248	282.029	15.5425	4.37302	1.6976	2.68599	0.148023	7.93651	15.873	79.3651	0.046976		0.161986		0.102707	1.26809	0.5	0.0168948	0.00547345		2.09138	123.788	0.814174	0.584147	0.890741	0.797419	0.394293
	62.8	3.1836	0.050676	20.93	104.19					5	20	61.8344	3.1316	58.3686	4.1253	29	240.882	12.1995	227.381	16.0705	2.29411	0.116185	2.16553	0.153052	7.93651	31.746	79.3651	0.046976		0.161986		0.102707	2.53618	0.25	0.0168948	0.0109469		2.09138	123.788	0.361836	0.259608	0.387717	0.347097	0.0985733
	49.9	2.7698	0.055499	20.93	90.65					5	30	40.6705	2.3667	39.5582	2.3877	68	158.436	9.21971	154.103	9.30152	1.50891	0.0878068	1.46765	0.0885859	7.93651	47.619	79.3651	0.046976		0.161986		0.102707	3.80428	0.166667	0.0168948	0.0164204		2.09138	123.788	0.225157	0.161544	0.238345	0.213374	0.0438103
	39.6	2.3965	0.060443	20.93	78.431					5	40	30.0744	1.7571	29.1527	1.8509	128	117.158	6.84496	113.567	7.21036	1.11579	0.06519	1.08159	0.0686701	7.93651	63.4921	79.3651	0.046976		0.161986		0.102707	5.07237	0.125	0.0168948	0.0218938		2.09138	123.788	0.160808	0.115375	0.168764	0.151083	0.0246433
	31.5	2.0652	0.065563	20.93	67.588					5	50	26.8794	1.0926	25.6893	1.6868	180	104.711	4.25633	100.075	6.57109	0.997251	0.0405365	0.953097	0.0625819	7.93651	79.3651	79.3651	0.046976		0.161986		0.102707	6.34046	0.1	0.0168948	0.0273673		2.09138	123.788	0.123858	0.0888643	0.129118	0.115591	0.0157717
	25	1.7698	0.070726	20.93	57.921					5	60	31.9707	1.3564	30.9811	1.2223	168	124.545	5.28399	120.69	4.76159	1.18614	0.0503237	1.14943	0.0453485	7.93651	95.2381	79.3651	0.046976		0.161986		0.102707	7.60855	0.0833333	0.0168948	0.0328407		2.09138	123.788	0.100065	0.0717936	0.103746	0.0928763	0.0109526
	19.9	1.5069	0.075798	20.93	49.318					5	70	31.517	0.8227	30.9244	0.828	188	122.778	3.20491	120.469	3.22556	1.16931	0.0305229	1.14732	0.0307196	7.93651	111.111	79.3651	0.046976		0.161986		0.102707	8.87665	0.0714286	0.0168948	0.0383142		2.09138	123.788	0.0835512	0.0599457	0.0862251	0.0771914	0.0080468
	15.8	1.277	0.080858	20.93	41.794					5	80	20.7354	0.9571	19.4664	0.8095	476	80.7768	3.72848	75.8333	3.15349	0.769303	0.0355093	0.722222	0.0300332	7.93651	126.984	79.3651	0.046976		0.161986		0.102707	10.1447	0.0625	0.0168948	0.0437876		2.09138	123.788	0.0714664	0.0512752	0.0734587	0.0657625	0.00616083
	12.5	1.077	0.085833	20.93	35.247
	9.97	0.90047	0.090346	20.93	29.471
	7.92	0.74969	0.094664	20.93	24.536
	6.3	0.62275	0.09886	20.93	20.381
	5	0.5127	0.10246	20.93	16.78
	3.97	0.42079	0.10586	20.92	13.771
	3.16	0.34355	0.10879	20.92	11.244
	2.51	0.27746	0.11063	20.92	9.0808
	1.99	0.22419	0.11254	20.92	7.3373
	1.58	0.18099	0.11431	20.92	5.9233
	1.26	0.14448	0.11495	20.92	4.7284
	0.998	0.11594	0.11614	20.92	3.7943
	0.793	0.093322	0.11765	20.92	3.0542
	0.631	0.07433	0.11776	20.92	2.4326
	0.501	0.059465	0.1188	20.92	1.9462
	0.398	0.047583	0.11968	20.92	1.5573
	0.317	0.037243	0.11751	20.92	1.2189
	0.252	0.029619	0.1175	20.92	0.96936
	0.2	0.025245	0.12643	20.92	0.82622
	0.159	0.020495	0.12916	20.92	0.67077
	0.126	0.015446	0.12256	20.92	0.50553
	0.1	0.01141	0.11406	20.92	0.37341
	Cross Model Viscosity
	\eta=0.125529/(1 + (0.0263514*x)^0.696827)

## Sheet: HA0pt316
	Rheology
	Shear Rate	Shear Stress	Viscosity	Temperature	Torque	Status		Etching Depth [um]	Width [um]	Qd [ul/min]	Qc [ul/min]	L [pixels]	L_SD [pixels]	H [pixels]	H_SD [pixels]	Frequency [Hz]	L[um]	L_SD[um]	H [um]	H_SD [um]	L/Width	L/width_SD	H/Width	H/Width_SD	U_d [mm/s]	U_c [mm/s]	ShearRate_d [1/s]	Eta_d [Pa*s]	Eta_c [Pa*s]	Alpha=eta_d\eta_c	Interfacial Tension [mN*m]	Ca_d	Ca_c	q=Qd/Qc	Re_d	Re_c	Lambda_s	Wi_d	El_d	Ca^-0.6*q^0.57*Wid^0.45	Ca^-0.6*q^0.57}	(q*Wid/Ca_c)^0.6	(q/Ca_c)^0.6*Wi_d^0.45	q/Ca_c
								100	105	10	100	42.7149	7.08748	39.5714	4.27618	192	166.4	27.61	154.154	16.6583	1.58476	0.262952	1.46814	0.15865	15.873	158.73	158.73	0.0689446	0.29	0.23774	3.04	0.359986	15.142	0.1	0.0230229	0.0547345	0.07	11.1111	482.612	0.155769	0.0527096	0.208614	0.145372	0.00660414
	[1/s]	[Pa]	[Pa·s]	[°C]	[µN·m]					10	10						0	0	0	0	0	0	0	0	15.873	15.873	158.73	0.0689446		0.23774		0.359986	1.5142	1	0.0230229	0.00547345		11.1111	482.612	2.30399	0.779632	3.30631	2.30399	0.660414
	ShearRate_1/s	Shear_Stress_Pa	Viscosity_Pas	Temperature_C	Torque_uNm					10	20						0	0	0	0	0	0	0	0	15.873	31.746	158.73	0.0689446		0.23774		0.359986	3.0284	0.5	0.0230229	0.0109469		11.1111	482.612	1.02394	0.346485	1.43916	1.00287	0.165103
	ShearRate_1/s	Shear_Stress_Pa	Viscosity_Pas	Temperature_C	Torque_uNm					10	30	63.7459	2.5007	52.5111	1.114	66	248.328	9.74172	204.562	4.3397	2.36503	0.0927783	1.94821	0.0413304	15.873	47.619	158.73	0.0689446		0.23774		0.359986	4.54261	0.333333	0.0230229	0.0164204		11.1111	482.612	0.63716	0.215604	0.884705	0.616503	0.0733793
	1000	23.917	0.023905	20.94	782.76					10	40	51.8229	6.1719	45.2964	1.2757	102	201.881	24.0432	176.457	4.96961	1.92268	0.228983	1.68054	0.0473297	15.873	63.4921	158.73	0.0689446		0.23774		0.359986	6.05681	0.25	0.0230229	0.0218938		11.1111	482.612	0.455062	0.153985	0.626429	0.436524	0.0412759
	791	21.78	0.027552	20.93	712.8					10	50	46.625	5.82942	52.875	6.77047	120	181.632	22.7091	205.98	26.375	1.72983	0.216277	1.96171	0.251191	15.873	79.3651	158.73	0.0689446		0.23774		0.359986	7.57101	0.2	0.0230229	0.0273673		11.1111	482.612	0.350498	0.118603	0.47927	0.333977	0.0264166
	628	19.836	0.031588	20.93	649.18					10	60	39.875	1.45774	41.625	1.92261	140	155.337	5.67876	162.154	7.48972	1.4794	0.0540834	1.54433	0.0713306	15.873	95.2381	158.73	0.0689446		0.23774		0.359986	9.08521	0.166667	0.0230229	0.0328407		11.1111	482.612	0.283168	0.0958192	0.38509	0.268348	0.0183448
	499	18.064	0.036212	20.93	591.19					10	70						0	0	0	0	0	0	0	0	15.873	111.111	158.73	0.0689446		0.23774		0.359986	10.5994	0.142857	0.0230229	0.0383142		11.1111	482.612	0.236437	0.0800064	0.320056	0.22303	0.0134778
	396	16.445	0.041498	20.93	538.2					10	70	39.2565	4.5051	37.5463	2.9676	172	152.928	17.5501	146.265	11.5606	1.45645	0.167143	1.393	0.110101	15.873	111.111	158.73	0.0689446		0.23774		0.359986	10.5994	0.142857	0.0230229	0.0383142		11.1111	482.612	0.236437	0.0800064	0.320056	0.22303	0.0134778
	315	14.957	0.047512	20.93	489.52					10	80	39.0344	5.8088	32.0458	2.6875	30	152.062	22.6287	124.838	10.4694	1.44821	0.215512	1.18893	0.0997088	15.873	126.984	158.73	0.0689446		0.23774		0.359986	12.1136	0.125	0.0230229	0.0437876		11.1111	482.612	0.202239	0.0684344	0.272669	0.190008	0.010319
	250	13.586	0.054324	20.92	444.65					10	90	30.0769	1.4398	29.2221	1.4743	35	117.168	5.60888	113.838	5.74328	1.11588	0.0534179	1.08417	0.0546979	15.873	142.857	158.73	0.0689446		0.23774		0.359986	13.6278	0.111111	0.0230229	0.0492611		11.1111	482.612	0.176204	0.0596247	0.23673	0.164964	0.00815326
	199	12.319	0.062003	20.92	403.18					20	100						0	0	0	0	0	0	0	0	31.746	158.73	317.46	0.044816		0.154538		0.468003	15.142	0.2	0.0708364	0.0547345		22.2222	313.712	0.315887	0.0782486	0.47927	0.300997	0.0132083
	158	11.153	0.070654	20.92	365.02					20	200						0	0	0	0	0	0	0	0	31.746	317.46	317.46	0.044816		0.154538		0.468003	30.284	0.1	0.0708364	0.109469		22.2222	313.712	0.140387	0.0347754	0.208614	0.131017	0.00330207
	125	10.071	0.080299	20.92	329.59					20	20						0	0	0	0	0	0	0	0	31.746	31.746	317.46	0.044816		0.154538		0.468003	3.0284	1	0.0708364	0.0109469		22.2222	313.712	2.07647	0.514365	3.30631	2.07647	0.330207
	99.6	9.0673	0.091001	20.92	296.75					20	40						0	0	0	0	0	0	0	0	31.746	63.4921	317.46	0.044816		0.154538		0.468003	6.05681	0.5	0.0708364	0.0218938		22.2222	313.712	0.922828	0.228595	1.43916	0.903837	0.0825517
	79.2	8.1426	0.10286	20.92	266.49					20	60						0	0	0	0	0	0	0	0	31.746	95.2381	317.46	0.044816		0.154538		0.468003	9.08521	0.333333	0.0708364	0.0328407		22.2222	313.712	0.574241	0.142246	0.884705	0.555623	0.0366897
	62.9	7.2851	0.11583	20.91	238.43					20	80						0	0	0	0	0	0	0	0	31.746	126.984	317.46	0.044816		0.154538		0.468003	12.1136	0.25	0.0708364	0.0437876		22.2222	313.712	0.410125	0.101592	0.626429	0.393418	0.0206379
	50	6.49	0.12989	20.91	212.4					5	100	16.3183	1.0824	15.5978	0.1064	1408	63.5695	4.2166	60.7628	0.414492	0.605424	0.040158	0.578693	0.00394754	7.93651	158.73	79.3651	0.102769		0.354376		0.268298	15.142	0.05	0.00772267	0.0547345		5.55556	719.383	0.0768122	0.0355061	0.0908047	0.07021	0.00330207
	39.7	5.7582	0.14505	20.91	188.45					5	10	82	9.38083	67.7143	0.48795	18	319.439	36.544	263.788	1.90086	3.04228	0.348038	2.51226	0.0181034	7.93651	15.873	79.3651	0.102769		0.354376		0.268298	1.5142	0.5	0.00772267	0.00547345		5.55556	719.383	1.13614	0.525173	1.43916	1.11275	0.330207
	31.5	5.0844	0.16121	20.91	166.4					5	20	63.3025	1.072	62.2711	0.777	28	246.601	4.17608	242.583	3.02688	2.34858	0.0397722	2.31032	0.0288274	7.93651	31.746	79.3651	0.102769		0.354376		0.268298	3.0284	0.25	0.00772267	0.0109469		5.55556	719.383	0.504923	0.233398	0.626429	0.484354	0.0825517
	25.1	4.4666	0.17826	20.91	146.18					5	30	40.0006	0.8576	38.6556	0.8976	104	155.826	3.34086	150.587	3.49669	1.48406	0.0318178	1.43416	0.0333018	7.93651	47.619	79.3651	0.102769		0.354376		0.268298	4.54261	0.166667	0.00772267	0.0164204		5.55556	719.383	0.314194	0.145235	0.38509	0.297751	0.0366897
	19.9	3.9038	0.19611	20.91	127.76					5	40	39.577	0.5557	38.1887	0.5604	34	154.176	2.16478	148.768	2.18309	1.46834	0.020617	1.41684	0.0207914	7.93651	63.4921	79.3651	0.102769		0.354376		0.268298	6.05681	0.125	0.00772267	0.0218938		5.55556	719.383	0.224398	0.103727	0.272669	0.210827	0.0206379
	15.8	3.3915	0.21446	20.9	111					5	50	28.7143	1.2536	27.5	1.5166	188	111.859	4.88352	107.129	5.90806	1.06533	0.0465097	1.02028	0.0562673	7.93651	79.3651	79.3651	0.102769		0.354376		0.268298	7.57101	0.1	0.00772267	0.0273673		5.55556	719.383	0.172836	0.0798928	0.208614	0.1613	0.0132083
	12.6	2.9294	0.23315	20.9	95.872					5	100						0	0	0	0	0	0	0	0	7.93651	158.73	79.3651	0.102769		0.354376		0.268298	15.142	0.05	0.00772267	0.0547345		5.55556	719.383	0.0768122	0.0355061	0.0908047	0.07021	0.00330207
	9.98	2.5145	0.25193	20.9	82.295					5	60	24.6794	1.7189	23.8445	1.7711	272	96.141	6.69614	92.8886	6.89949	0.915629	0.0637728	0.884653	0.0657095	7.93651	95.2381	79.3651	0.102769		0.354376		0.268298	9.08521	0.0833333	0.00772267	0.0328407		5.55556	719.383	0.139635	0.0645454	0.16762	0.129604	0.00917241
	7.93	2.144	0.27042	20.9	70.168					5	70	27.9211	0.8862	27.447	0.9593	256	108.769	3.45228	106.922	3.73705	1.0359	0.0328788	1.01831	0.0355909	7.93651	111.111	79.3651	0.102769		0.354376		0.268298	10.5994	0.0714286	0.00772267	0.0383142		5.55556	719.383	0.116591	0.0538937	0.139313	0.107716	0.00673892
	6.3	1.8187	0.28868	20.9	59.521					5	80	22.6513	1.3891	22.1993	1.2593	360	88.2404	5.41138	86.4795	4.90573	0.840384	0.0515369	0.823615	0.0467212	7.93651	126.984	79.3651	0.102769		0.354376		0.268298	12.1136	0.0625	0.00772267	0.0437876		5.55556	719.383	0.0997274	0.0460986	0.118686	0.091768	0.00515948
	5.01	1.5357	0.30663	20.9	50.259					5	90	25.6667	1.21106	24.1667	0.983192	312	99.9871	4.7178	94.1436	3.83012	0.952259	0.0449315	0.896606	0.0364773	7.93651	142.857	79.3651	0.102769		0.354376		0.268298	13.6278	0.0555556	0.00772267	0.0492611		5.55556	719.383	0.0868893	0.0401642	0.103043	0.0796724	0.00407663
	3.98	1.2888	0.32393	20.9	42.18
	3.16	1.0706	0.33883	20.9	35.038
	2.51	0.88659	0.35312	20.89	29.016
	1.99	0.73077	0.36635	20.89	23.917
	1.58	0.59777	0.3773	20.89	19.564
	1.26	0.48779	0.38754	20.89	15.964
	1	0.39536	0.39546	20.89	12.939
	0.794	0.31887	0.40157	20.89	10.436
	0.631	0.25802	0.40904	20.88	8.4444
	0.501	0.20801	0.41517	20.88	6.8078
	0.398	0.16543	0.41564	20.88	5.4141
	0.317	0.13349	0.42127	20.88	4.3688
	0.252	0.10604	0.42124	20.88	3.4703
	0.2	0.085125	0.42606	20.88	2.7859
	0.159	0.070224	0.44123	20.88	2.2983
	0.126	0.054034	0.42897	20.88	1.7684
	0.101	0.044899	0.44644	20.88	1.4694
	0.0797	0.036458	0.45732	20.88	1.1932
	0.0632	0.027428	0.43407	20.88	0.89767
	0.0501	0.021326	0.42524	20.88	0.69794
	0.0398	0.018863	0.47368	20.88	0.61733
	0.0316	0.016172	0.51131	20.89	0.52929
	0.0251	0.012069	0.48024	20.89	0.39499
	0.02	0.0086202	0.43103	20.89	0.28212
	0.0159	0.0071245	0.44929	20.9	0.23317
	0.0126	0.0065565	0.52045	20.9	0.21458
	0.01	0.003984	0.39823	20.94	0.13039
	Cross Model Viscosity
	\eta=0.45/(1+(0.07*x)^0.71)

## Sheet: HA0pt562
	Rheology
	Shear Rate	Shear Stress	Viscosity	Temperature	Torque	Status		Etching Depth [um]	Width [um]	Qd [ul/min]	Qc [ul/min]	L [pixels]	L_SD [pixels]	H [pixels]	H_SD [pixels]	Frequency [Hz]	L[um]	L_SD[um]	H [um]	H_SD [um]	L/Width	L/width_SD	H/Width	H/Width_SD	U_d [mm/s]	U_c [mm/s]	ShearRate_d [1/s]	Eta_d [Pa*s]	Eta_c [Pa*s]	Alpha=eta_d\eta_c	Interfacial Tension [mN*m]	Ca_d	Ca_c	q=Qd/Qc	Re_d	Re_c	Lambda_s	Wi_d	El_d	Ca^-0.6*q^0.57*Wid^0.45	Ca^-0.6*q^0.57}	(q*Wid/Ca_c)^0.6	(q/Ca_c)^0.6*Wi_d^0.45	q/Ca_c
								100	105	10	100	45.5	4.76445	41.333	4.54606	156	177.25	18.5604	161.017	17.7096	1.68809	0.176766	1.53349	0.168663	15.873	158.73	158.73	0.162261	0.29	0.559521	1.63	1.58011	28.2403	0.1	0.0097824	0.0547345	0.216	34.2857	3504.84	0.177942	0.0362642	0.282193	0.166065	0.00354103
	[1/s]	[Pa]	[Pa·s]	[°C]	[µN·m]					10	10						0	0	0	0	0	0	0	0	15.873	15.873	158.73	0.162261		0.559521		1.58011	2.82403	1	0.0097824	0.00547345		34.2857	3504.84	2.63196	0.536387	4.47246	2.63196	0.354103
	ShearRate_1/s	Shear_Stress_Pa	Viscosity_Pas	Temperature_C	Torque_uNm					10	20						0	0	0	0	0	0	0	0	15.873	31.746	158.73	0.162261		0.559521		1.58011	5.64807	0.5	0.0097824	0.0109469		34.2857	3504.84	1.1697	0.238382	1.94675	1.14563	0.0885259
	1000	46.234	0.046211	20.82	1513.1					10	30	81.314	2.0016	68.4298	0.2473	46	316.767	7.79743	266.575	0.963381	3.01683	0.0742612	2.53881	0.00917506	15.873	47.619	158.73	0.162261		0.559521		1.58011	8.4721	0.333333	0.0097824	0.0164204		34.2857	3504.84	0.727859	0.148336	1.19674	0.704261	0.0393448
	791	43.144	0.054553	20.82	1412					10	40	66.1667	14.8784	59.8333	5.49242	62	257.759	57.9603	233.086	21.3963	2.45485	0.552003	2.21987	0.203774	15.873	63.4921	158.73	0.162261		0.559521		1.58011	11.2961	0.25	0.0097824	0.0218938		34.2857	3504.84	0.519839	0.105942	0.847372	0.498663	0.0221315
	628	40.201	0.063983	20.82	1315.7					10	50	49.5146	5.7204	45.1167	4.5273	110	192.889	22.2844	175.757	17.6365	1.83704	0.212232	1.67387	0.167967	15.873	79.3651	158.73	0.162261		0.559521		1.58011	14.1202	0.2	0.0097824	0.0273673		34.2857	3504.84	0.400391	0.0815987	0.648309	0.381518	0.0141641
	499	37.427	0.074974	20.82	1224.9					10	60	49.7396	2.0275	45.4	5.0161	160	193.765	7.89832	176.86	19.5407	1.84539	0.0752221	1.68438	0.186102	15.873	95.2381	158.73	0.162261		0.559521		1.58011	16.9442	0.166667	0.0097824	0.0328407		34.2857	3504.84	0.323476	0.0659236	0.520912	0.306547	0.00983621
	397	34.815	0.087779	20.82	1139.4					10	70	47.6667	11.6733	47.5	8.06846	112	185.69	45.4746	185.041	31.4315	1.76848	0.433091	1.76229	0.299347	15.873	111.111	158.73	0.162261		0.559521		1.58011	19.7682	0.142857	0.0097824	0.0383142		34.2857	3504.84	0.270094	0.0550444	0.432941	0.254778	0.0072266
	315	32.373	0.10273	20.82	1059.5					10	80	47.2	4.14729	46.8	1.30384	124	183.872	16.1562	182.314	5.07924	1.75116	0.153868	1.73632	0.0483737	15.873	126.984	158.73	0.162261		0.559521		1.58011	22.5923	0.125	0.0097824	0.0437876		34.2857	3504.84	0.231028	0.0470829	0.36884	0.217056	0.00553287
	250	30.088	0.12018	20.82	984.72					10	90	41.8333	2.31661	40.1667	3.65605	42	162.966	9.02457	156.473	14.2425	1.55205	0.0859483	1.49022	0.135643	15.873	142.857	158.73	0.162261		0.559521		1.58011	25.4163	0.111111	0.0097824	0.0492611		34.2857	3504.84	0.201287	0.0410218	0.320225	0.188446	0.00437165
	199	27.917	0.14035	20.82	913.67					20	100						0	0	0	0	0	0	0	0	31.746	158.73	317.46	0.101407		0.349681		1.97502	28.2403	0.2	0.0313055	0.0547345		68.5714	2190.4	0.360852	0.0538351	0.648309	0.343843	0.00708207
	158	25.875	0.16372	20.82	846.82					20	20						0	0	0	0	0	0	0	0	31.746	31.746	317.46	0.101407		0.349681		1.97502	5.64807	1	0.0313055	0.0109469		68.5714	2190.4	2.37205	0.353883	4.47246	2.37205	0.177052
	126	23.928	0.19056	20.82	783.1					20	60						0	0	0	0	0	0	0	0	31.746	95.2381	317.46	0.101407		0.349681		1.97502	16.9442	0.333333	0.0313055	0.0328407		68.5714	2190.4	0.655983	0.0978652	1.19674	0.634715	0.0196724
	99.8	22.097	0.2215	20.82	723.19					20	80						0	0	0	0	0	0	0	0	31.746	126.984	317.46	0.101407		0.349681		1.97502	22.5923	0.25	0.0313055	0.0437876		68.5714	2190.4	0.468505	0.0698956	0.847372	0.44942	0.0110657
	79.3	20.344	0.25667	20.82	665.8					5	100	24.228	1.6808	23.0075	1.5761	412	94.3825	6.54772	89.628	6.13985	0.898881	0.0623592	0.8536	0.0584748	7.93651	158.73	79.3651	0.255253		0.880184		1.24283	28.2403	0.05	0.00310927	0.0547345		17.1429	5513.47	0.0877462	0.0244282	0.122832	0.0802043	0.00177052
	63	18.672	0.29652	20.82	611.08					5	10						0	0	0	0	0	0	0	0	7.93651	15.873	79.3651	0.255253		0.880184		1.24283	2.82403	0.5	0.00310927	0.00547345		17.1429	5513.47	1.29786	0.361319	1.94675	1.27115	0.177052
	50	17.079	0.34139	20.82	558.97					5	20	49.4734	2.0191	47.3609	1.9427	41	192.728	7.8656	184.499	7.56798	1.83551	0.0749105	1.75713	0.072076	7.93651	31.746	79.3651	0.255253		0.880184		1.24283	5.64807	0.25	0.00310927	0.0109469		17.1429	5513.47	0.576797	0.160578	0.847372	0.553301	0.0442629
	39.7	15.568	0.3917	20.82	509.52					5	30	39.7742	0.4166	38.0074	0.3785	72	154.944	1.62291	148.062	1.47448	1.47566	0.0154562	1.41011	0.0140427	7.93651	47.619	79.3651	0.255253		0.880184		1.24283	8.4721	0.166667	0.00310927	0.0164204		17.1429	5513.47	0.358919	0.0999215	0.520912	0.340136	0.0196724
	31.6	14.136	0.44763	20.82	462.64					5	40	35.9101	1.6955	34.4731	1.1953	48	139.891	6.60499	134.293	4.65641	1.3323	0.0629046	1.27898	0.0443467	7.93651	63.4921	79.3651	0.255253		0.880184		1.24283	11.2961	0.125	0.00310927	0.0218938		17.1429	5513.47	0.256341	0.0713643	0.36884	0.240838	0.0110657
	25.1	12.779	0.50938	20.83	418.23					5	50	35.6667	1.75119	33.5	1.76068	116	138.943	6.82193	130.503	6.85891	1.32327	0.0649708	1.24288	0.0653229	7.93651	79.3651	79.3651	0.255253		0.880184		1.24283	14.1202	0.1	0.00310927	0.0273673		17.1429	5513.47	0.197439	0.0549662	0.282193	0.184261	0.00708207
	19.9	11.494	0.57636	20.82	376.16					5	5						0	0	0	0	0	0	0	0	7.93651	7.93651	79.3651	0.255253		0.880184		1.24283	1.41202	1	0.00310927	0.00273673		17.1429	5513.47	2.92034	0.81301	4.47246	2.92034	0.708207
	15.8	10.288	0.64938	20.83	336.69					5	60	37.4505	1.9959	35.5325	1.9094	132	145.892	7.77522	138.42	7.43825	1.38945	0.0740498	1.31829	0.0708405	7.93651	95.2381	79.3651	0.255253		0.880184		1.24283	16.9442	0.0833333	0.00310927	0.0328407		17.1429	5513.47	0.159511	0.0444073	0.22674	0.148053	0.0049181
	12.6	9.1487	0.72728	20.83	299.42					5	70	33.1678	2.48328	31.333	2.80476	140	129.208	9.67385	122.061	10.9262	1.23056	0.0921319	1.16248	0.104059	7.93651	111.111	79.3651	0.255253		0.880184		1.24283	19.7682	0.0714286	0.00310927	0.0383142		17.1429	5513.47	0.133188	0.0370789	0.188448	0.12305	0.0036133
	9.99	8.0909	0.80951	20.83	264.8					5	80	31.3333	3.6697	32.5	3.937	164	122.062	14.2957	126.607	15.337	1.16249	0.136149	1.20578	0.146067	7.93651	126.984	79.3651	0.255253		0.880184		1.24283	22.5923	0.0625	0.00310927	0.0437876		17.1429	5513.47	0.113923	0.0317158	0.160547	0.104831	0.00276643
	7.94	7.1056	0.89496	20.83	232.55					5	90	27.5537	1.729	25.4285	2.046	200	107.338	6.73549	99.0592	7.97039	1.02227	0.0641475	0.943421	0.0759085	7.93651	142.857	79.3651	0.255253		0.880184		1.24283	25.4163	0.0555556	0.00310927	0.0492611		17.1429	5513.47	0.0992578	0.027633	0.139386	0.0910136	0.00218582
	6.31	6.2	0.98265	20.83	202.91
	5.01	5.3746	1.0727	20.83	175.9
	3.98	4.671	1.1735	20.83	152.87
	3.16	4.0011	1.2651	20.83	130.95
	2.51	3.4046	1.3557	20.83	111.42
	2	2.8793	1.4429	20.83	94.232
	1.59	2.4209	1.5273	20.84	79.231
	1.26	2.0186	1.6033	20.84	66.065
	1	1.6769	1.6767	20.84	54.882
	0.795	1.387	1.7437	20.84	45.394
	0.631	1.1409	1.808	20.84	37.339
	0.501	0.93349	1.8615	20.84	30.551
	0.398	0.75869	1.9054	20.85	24.83
	0.317	0.62103	1.96	20.85	20.325
	0.252	0.50311	1.9988	20.85	16.466
	0.2	0.40817	2.0416	20.85	13.359
	0.159	0.32957	2.0752	20.85	10.786
	0.126	0.26735	2.1207	20.85	8.7499
	0.1	0.21252	2.1215	20.85	6.9553
	0.0795	0.16408	2.0642	20.86	5.3698
	0.0631	0.13565	2.1489	20.87	4.4397
	0.0502	0.10458	2.0847	20.87	3.4228
	0.0398	0.084717	2.1259	20.87	2.7726
	0.0317	0.067498	2.1324	20.88	2.2091
	0.0251	0.056415	2.2444	20.88	1.8463
	0.02	0.043912	2.2001	20.9	1.4372
	0.0159	0.038431	2.4145	20.9	1.2578
	0.0126	0.028014	2.2232	20.9	0.91685
	0.01	0.022776	2.2742	20.9	0.7454
	Cross Model Viscosity
	\eta=2.23/(1+(0.216*x)^0.72)

## Sheet: HA1
	Rheology
	Shear Rate	Shear Stress	Viscosity	Temperature	Torque	Status		Etching Depth [um]	Width [um]	Qd [ul/min]	Qc [ul/min]	L [pixels]	L_SD [pixels]	H [pixels]	H_SD [pixels]	Frequency [Hz]	L[um]	L_SD[um]	H [um]	H_SD [um]	L/Width	L/width_SD	H/Width	H/Width_SD	U_d [mm/s]	U_c [mm/s]	ShearRate_d [1/s]	Eta_d [Pa*s]	Eta_c [Pa*s]	Alpha=eta_d\eta_c	Interfacial Tension [mN*m]	Ca_d	Ca_c	q=Qd/Qc	Re_d	Re_c	Lambda_s	Wi_d	El_d	Ca^-0.6*q^0.57*Wid^0.45	Ca^-0.6*q^0.57}	(q*Wid/Ca_c)^0.6	(q/Ca_c)^0.6*Wi_d^0.45	q/Ca_c
								100	105	10	100						0	0	0	0	0	0	0	0	15.873	158.73	158.73	0.521135	0.29	1.79702	1.63	5.07484	28.2403	0.1	0.00304586	0.0547345	0.9	142.857	46902.1	0.338208	0.0362642	0.664384	0.315634	0.00354103
	[1/s]	[Pa]	[Pa·s]	[°C]	[µN·m]					5	100	35.5	3.39	28.6667	0.516398	136	138.294	13.2061	111.674	2.01168	1.31708	0.125772	1.06356	0.0191588	7.93651	158.73	79.3651	0.812479		2.80165		3.95598	28.2403	0.05	0.000976826	0.0547345		71.4286	73123.1	0.166776	0.0244282	0.28919	0.152441	0.00177052
	ShearRate_1/s	Shear_Stress_Pa	Viscosity_Pas	Temperature_C	Torque_uNm					5	20	70.1645	5.308	58.1208	9.9333	24	273.333	20.6778	226.415	38.6961	2.60317	0.196932	2.15634	0.368535	7.93651	31.746	79.3651	0.812479		2.80165		3.95598	5.64807	0.25	0.000976826	0.0109469		71.4286	73123.1	1.0963	0.160578	1.99502	1.05164	0.0442629
	1000	95.56	0.095516	20.86	3127.5					5	30	47.0232	2.0503	43.2866	2.1025	48	183.183	7.98714	168.627	8.19049	1.7446	0.076068	1.60597	0.0780047	7.93651	47.619	79.3651	0.812479		2.80165		3.95598	8.4721	0.166667	0.000976826	0.0164204		71.4286	73123.1	0.682184	0.0999215	1.22642	0.646483	0.0196724
	792	90.871	0.11479	20.86	2974					5	40	33.8795	2.8805	31.6424	2.5455	64	131.981	11.2213	123.266	9.91624	1.25696	0.106869	1.17396	0.0944404	7.93651	63.4921	79.3651	0.812479		2.80165		3.95598	11.2961	0.125	0.000976826	0.0218938		71.4286	73123.1	0.487218	0.0713643	0.868383	0.457752	0.0110657
	629	86.358	0.1373	20.86	2826.3					5	50	34.5887	0.1469	32.3223	0.4079	102	134.744	0.572263	125.915	1.58901	1.28327	0.00545013	1.19919	0.0151335	7.93651	79.3651	79.3651	0.812479		2.80165		3.95598	14.1202	0.1	0.000976826	0.0273673		71.4286	73123.1	0.375265	0.0549662	0.664384	0.350218	0.00708207
	500	82.144	0.16437	20.87	2688.4					5	60	35.8997	2.4449	33.5	2.5121	112	139.851	9.52435	130.503	9.78613	1.33191	0.0907081	1.24288	0.0932013	7.93651	95.2381	79.3651	0.812479		2.80165		3.95598	16.9442	0.0833333	0.000976826	0.0328407		71.4286	73123.1	0.303177	0.0444073	0.533829	0.281398	0.0049181
	397	78.14	0.1968	20.87	2557.4					5	70	36.97	0.1091	33.6756	0.7748	208	144.02	0.42501	131.187	3.01831	1.37162	0.00404771	1.2494	0.0287458	7.93651	111.111	79.3651	0.812479		2.80165		3.95598	19.7682	0.0714286	0.000976826	0.0383142		71.4286	73123.1	0.253145	0.0370789	0.443676	0.233876	0.0036133
	315	74.317	0.23559	20.87	2432.2					5	80	38.333	2.73025	31.6667	2.33809	104	149.33	10.636	123.361	9.10826	1.42219	0.101295	1.17486	0.0867453	7.93651	126.984	79.3651	0.812479		2.80165		3.95598	22.5923	0.0625	0.000976826	0.0437876		71.4286	73123.1	0.21653	0.0317158	0.377986	0.199248	0.00276643
	251	70.633	0.28182	20.87	2311.7					5	90	25.2	1.30384	24.2	1.78885	180	98.1691	5.07924	94.2735	6.96866	0.934944	0.0483737	0.897843	0.0663682	7.93651	142.857	79.3651	0.812479		2.80165		3.95598	25.4163	0.0555556	0.000976826	0.0492611		71.4286	73123.1	0.188656	0.027633	0.328165	0.172986	0.00218582
	199	67.072	0.33683	20.87	2195.1
	158	63.705	0.40267	20.87	2084.9
	126	60.366	0.48026	20.87	1975.7
	99.9	57.084	0.57163	20.88	1868.2
	79.3	53.935	0.6798	20.88	1765.2
	63	50.83	0.80643	20.88	1663.6
	50.1	47.745	0.95339	20.88	1562.6
	39.8	44.685	1.1231	20.88	1462.4
	31.6	41.64	1.3171	20.89	1362.8
	25.1	38.69	1.5404	20.89	1266.2
	20	35.805	1.7947	20.89	1171.8
	15.9	32.987	2.0811	20.89	1079.6
	12.6	30.238	2.4013	20.89	989.63
	10	27.571	2.7568	20.9	902.33
	7.94	24.995	3.146	20.9	818.03
	6.31	22.527	3.5686	20.9	737.27
	5.01	19.974	3.9839	20.9	653.69
	3.98	17.713	4.448	20.9	579.7
	3.16	15.616	4.9385	20.9	511.09
	2.51	13.892	5.5303	20.91	454.67
	2	12.12	6.0732	20.91	396.66
	1.59	10.501	6.6249	20.91	343.68
	1.26	9.0332	7.1728	20.91	295.64
	1	7.7298	7.7279	20.92	252.98
	0.795	6.5761	8.2764	20.92	215.22
	0.631	5.5669	8.819	20.92	182.19
	0.501	4.6811	9.3378	20.92	153.2
	0.398	3.9153	9.832	20.92	128.14
	0.317	3.2744	10.337	20.92	107.17
	0.252	2.7191	10.807	20.93	88.99
	0.2	2.2564	11.288	20.93	73.846
	0.159	1.812	11.426	20.94	59.302
	0.126	1.4881	11.813	20.94	48.702
	0.1	1.247	12.45	20.94	40.812
	0.0796	1.0389	13.058	20.94	34.002
	0.0632	0.84648	13.393	20.95	27.704
	0.0502	0.67764	13.507	20.95	22.177
	0.0399	0.54499	13.672	20.95	17.836
	0.0316	0.42615	13.467	20.96	13.947
	0.0251	0.33643	13.387	20.96	11.011
	0.02	0.2938	14.7	20.96	9.6156
	0.0159	0.2202	13.883	20.97	7.2065
	0.0126	0.19162	15.2	20.97	6.2714
	0.01	0.15158	15.148	20.97	4.9608
	Cross Model Viscosity
	\eta=15/(1+(0.9*x)^0.67)
